# Supplementary material for: DNA target recognition domains in the Type I restriction and modification systems of Staphylococcus aureus
Source: PubMed Central journal article supplement (PMC5399793; doi:10.1093/nar/gkx067), 2017-02-09
Supplement: gkx067_Supp.pdf [file gkx067_Supp.pdf]

**SUPPLEMENTARY INFORMATION**

**DNA target recognition domains in the Type I  
restriction/modification systems of Staphylococcus aureus.**

**Laurie P. Cooper, Gareth A. Roberts, John H. White, Yvette A.  
Luyten, Edward K.M. Bower, Richard D. Morgan, Richard J. Roberts,  
Jodi A. Lindsay, David T.F. Dryden.**

**Pages 2 and 3: SUPPLEMENTARY INFORMATION FOR TABLE 1.**

**Pages 4 to 9: Supplementary information for MATERIALS AND METHODS  
SECTION "Construction of further MTases with further combinations  
of TRDs using synthetic genes."**

**Pages 10 to 16: SUPPLEMENTARY INFORMATION FOR TABLE 2.**

**Pages 17 to 57: SUPPLEMENTARY INFORMATION FOR TABLE 3.**

**Pages 58 to 85: SUPPLEMENTARY INFORMATION FOR TABLE 4**

**Pages 86 to 91: SUPPLEMENTARY INFORMATION FOR TABLES 5 AND 6.**

**Pages 92 to 97: PROMALS ALIGNMENT OF TRD AMINO ACID SEQUENCES WITH  
SECONDARY STRUCTURE PREDICTIONS.**

**SUPPLEMENTARY INFORMATION FOR TABLE 1.**

The amino acid sequences in FASTA format of the first TRD with its letter code, DNA target (5' to 3') and methylation site underlined. The TRDs labelled as NOVEL 1, NOVEL 2 and NOVEL 4 were found once all of the other TRDs had been analysed but are included in this list for completeness.

The TRD sequences are flanked by the conserved regions so to obtain the amino acid sequence of any HsdS subunit simply paste the sequence for the second TRD directly on to the end of the sequence for the first TRD.

```
>A CCAY
MSNTQKKNVPELRFPGFEGEWEEKQLGDLTTKIGSGKTPKGGSENYTNKGI PFLRSQNI RNGKLNLDLVYISKDIDDEMKNRSRTYYGDVLLNITGASIG
RTAINSIVETHANLNQHVCIRLKKYIYFFGQYLLSRKGRKIFLAQSGSREGLNFKEITANLKIFTPTTFEEQQKIGKFFSKLDRQIELEEQKLELL
QQQ
>B AGG
MSNTQKKNVPELRFPGFEGEWEEKQLGDLTDRVIRKNKNLESKKPLTISGQLGLIDQTEYFYSKSVSKNLENYTLIKNGEFAYNKSYNGYPLGAIKRLT
RYDSGVLSSLYICFSIKSEMSKDFMEAYFDSTHWYREVSGIAVEGARNHGLLNVSVNDFTTILIKYPSLEEQQKIGKFFSKLDRQIELEEQKLELLQQQ
>C GWAG
MSNTQTKNVPELRFPGFEGEWEEKQVGELEEFKNGLNKGEYFGSGSSIVNFKDVFNNRSINTNNLTGKVVNSKELKNYSVEKGDVFFTRTSEVIGEIG
YPSVILNDPENTVFSGFVLRGRPKSGIDLINNNFKRYVFFTNSFRKEMITKSSMTTRALTSGTAINKMKVIYPVSAKEQKIGDFFSKLDRQIELEEQKLE
ELLQQQ
>J GGA
MSNTQKKNVPELRFPEFEGEWEEKLGDLIKVNSGKDYKHLDKGDI PVYGTGGYMTSVSEPLSEIDAVGIGRKGITINKPYLLEAPFWTVDTLTYCTPEKE
ADILFILSLFRKINWKLYDESTGVPSLSKQTINKINRLVPTNKEQQKIGEFFSKLDRQIELEEQKLELLQQQ
>M CAG
MSNTQTKNVPELRFPGFEGEWEEKLEDLGLFQKSYFSRAKEGNGKTKHIHYGDIHSHKFKTVLSDGNIPNIEKAVFELIQKGDIVFADASEDYSDLG
KAVMIDFEPNSLISGLHHLFRPLNNAISNFLIFYTKTLSYKFFIRQQGTGISVLGISKKSLNLDLVIPRSELEQQKIGQFFSKLDRQIELEEQKLELL
QQQ
>N ACC
MSNTQKKNVPELRFPGFEGEWEEKLGEFAGKVTQKNVDKXYIETLTNSAELGIIISQKDYFDKEISNIDNIKKYVVEENDFVYNPRMSNYAPFGPVNRN
KLGKKGVMSPLYTVFKIQNIDLNFIEFYFKSSKWYRFMALNGDSGARADRFISIKDRTFMEMPLHIPCMDEQIKIGQFFSKLDRQIELEEQKLELLQQQ

>O CAC
MSNKQKKNVPELRFPGFEGEWEEKLGEVGTFTSGGTPLKSKSEYWNWDIPIWITTDGIHNIKRENI TNFITEKGLNESSAKLITNEALIAMYGQKTRG
MSAINLFEATTNQACAIYQTNQININVFVQYFQKLYEFLRSLSNEGSQKNLSLSLLKEITLNYPNQEQQKIGDFFSKLDRQIELEEQKLELLQQQ
>R GARA
MSNTQKKNVPELRFPGFEGEWEEKLGEVAKIYDGTHTQTPKYTNEGIFLNSVENIKTLNSSKYISEEAFEKEFKIRPEFGDILMTRIGDIGTPNIVSSNE
KFAYVYSLALLKTKNLSYFLKNLILSSSIQNELWRKTLHVAFPPKINKNEIGKIKINYPKQEQKIGQFFSKLDRQIELEEQKLELLQQQ
>T CAG
MSNTQTKNVPELRFPGFEGEWEEKELGEIFQIISGSTPLKSNKEFYENGNINWVKTDDLNNKSVTHSKEKITEYAMKSLKLVKPNVSVLIAMYGGFNQI
GRTGLLKIDATINQAI SALLMNHETNPEFIQAFNLNQQVKGWRYAASSRKDPNITKKDIEQKVPVYSINEQQKIGEFFSKIDHQIELEEQKLELLQQQ
>V CNAG
MSNTGKMNVPELRFPGFEGEWEEKLRELRLNPKDKYSYTGPPGSDLKSDYTTDGIQIIQLQNIQDGYFYNSNKFVTSNEKAEVLKSCNVFPGDIVIAK
MADPIARA AIVPDNNIGKYLMSADGIRLSVDTVHFNTKVFLECI NRKSRKVEDNSSGSTRMRIGLSTLGSLLTKTTLKEQQKIGQFFSKLDRQIVLE
EQKLELLQQQ
>X TCTA
MSNTQKKNVPELRFPGFEGEWEEKQFADFTKINQGLQIAINERKTEYSPELYFITNEFLRPN SQTKYFIENPPQSVIANKEDILMTRTGNTGKVVTNVF
GAFHNNFFKIKFDKNLYDRLFLVEVLNSSKI QNKILSLAGSSTIPDLNHSDFYSSISSYPLREQQKIGKFFSKLDRQIELEEQKLELLQQQ
>Z GAC
MSNTQTKNVPELRFPGFEGEYSLDIFGNLATNKSEKFNPNQENASIDIELDCIEQNTGR LIKIYNSKEFSSQKNKFNPNQVLYGKLRPYLNKYYFTKSG
VCSSEIWLKSTKEDKLLNLFYFIQTKRYSDVASKSAGSKMPRADWGLIENIRVYFPELCEQQKIGQFFSKLDRQIELEEQKLELLQQQ
>b* GGA
MSNTQKKNVPELRFPEFEGEWEEKLEDTLEFIKDGTHGTHENVNNGPWLLSAKNIKNNKIISSDDRKISESDYKIKYKYLEKGDLLLTIVGTIGRA
AIVKNPNNIAFQRSVAI LKTKATYDVGFIFQLFQTKYFKNLLLRKQVVSQAQPLYLGDIRKIKISITNIEEQKIGIFFSKLDRQIELEEQKLELLQQQ
>e* GAG
MSNTQKKNVPELRFPGFEGEWEEKSIS SFLKESKIKGNSGSHAKKLTVKLWGKGVVPPKETFPGSDNTQYYKRKAGQIMYGKLDLFCAGFIVPDSLNNY
ESTIDSPSDFINGDSKFLLEKIKLSFYKFKGDIANGSRKAKRINQDTFSLPVFAPKYDEQLRIGEFFSKLDRQIELQKQKLELLQQQ
>NOVEL 1
MSNTQKKNVPELRFPGFEGEWEEKLGEVATFAKGLGAKKDVSQNGVPVILYGYELTYKYGAIVSKI FSKTDIPENKLMKAKNDVLI PSSGETAIDIAT
ASCIYLNKGVAVGGDINILTPQKQDGRFISLSINGINKNELSKYAQKGTVVHLYNNDIKNLKIAFPSEFEEQVRIGNFFSKLDRQIELEEQKLELLQQQ
>NOVEL 2
MSNTQKKNVPELRFPEFEGEWKDVKFSVIFQEVSNKTS DLAKYPLFSLTVEKGITPKTERYKRDVFKSDNFKIVEPRDIVNPMNVTLGAI DLSKYN
DIALSGYHYHVMKIINSFNPDFISNFLKTEKMI IHYKKIATGSLMEKQRVHFSEFKNI IKKFPNKEQQKIGDFFSKLDRQIELQVQKLELLQQQ
>NOVEL 4
MTEQINTPELRFPEFKNEWSYDLVSDVVTNKS KKFDPKKEEAKKDIELDSIEQNTGRLLDITYISNDFTSQKNKFNKGNVLYSKLRPYLNKYYATIDGVC
SSEIWLNTLNKDVLANKFLYFIQTNRFSSVTNKSAGSKMPRADWELVKNIRLYKGSIEEQEKIGYFFSKLDRQIELEEKLELLEQQQ
```

The amino acid sequences in FASTA format of the second TRD with its letter code, DNA target (5' to 3') and its methylation site underlined. The TRD labelled as NOVEL 3 was found once all of the other TRDs had been analysed but is included in this list for completeness.

>D ATC  
KKGYMQKIFSQELRFKDENGEDYPHWENSKIEKYLKERNERSDKGQMLSVTINSGIKFSELDRKDNSSKNKSNYKVRKNDIAYNSMRMQGASGKSNY  
NGIVSPAYTVLYPTQNTSSLFYGKFKTHRMIHKFKINSQGLTSDTWNLKYQLKNINIDI PVLEEQEKIGDFFKMDILISKQKIKIEILEKEKQSFLO  
KMFL  
>E TCAY  
KKGYMQKIFSQELRFKDENGNDYPEWEETTIKEIAQINXGKKDTKDAITNGSYDFYVRSPIVYKINTFSYEGEAILTVGDGVGVGVFHYVNGKFDYHQR  
VYKISDFKNYYGLLLFFYYFSQNFLETKKYSAKTSVDSVRKDMIANKVPRPIYIEQKKIGQFIKRVNDNKTQKQVIELLQKQKALLQKMF I  
>F TTAA  
KKGYMQKIFSQELRFKDEEGKDYDPWKSISQEIFENKGGTALETEFNFNGYKVISIGSYSINSTYNDQNIQVNVNKNKTEKYILSKGDLAMVLNDKTKD  
GKIIGRSIFIDKDNQYIYNQRTERLIPFAENDNKFLWFLMNTDLIRNKIKGMMQGATQVYINYSIKLISIQPLPLEEQQKIRGFLEVLSGITTKQLHKI  
DQLKERKKAFLQKMF I  
>G ACA  
KKGYMQKIFTQELRFKDENGEYPEWENKFIKIDIFIFENRRRKPITSSLRKGLYPYGGATGIDYVVDYLFNNEERLLIGEDGAKWQGFETSSFIANGQ  
YVWNNHAHVKSNDHNLFFMNYLNFKELRAFVTGNAPAKLTHANLCNINLKI PCLTEQDKVSALLKSIDNKMNNQMNRIELLKERKELLQKMF I  
>H TAC  
KKCYIQKIFSQELRFKDEEGNYKGNKKQLKDVLEFSNKRTINENYVPLTSSRQGLILQSDYYKDRKTFAESNIGYFILPKNHITVRSRSDDGIFKFN  
LNLMDVGIISKYYPVFKGIDANQYYLTLHLNYQLKKEYIKYATGTSQVLVLSQKDLQNIKTLPSEYEEQKIGDFSEIDRLVEKQSSKVGRLKVRKEL  
LQKMFV  
>I YTCA  
KKGYMQKIFSQELRFKNENNDYDPWERIKFFDVIDKVIDFRGRTPKKLNMEWSDEGYLALSAVNVKKGYIDFNVEAKYGNLDLYTRWMRGNELYKQVFL  
FTTEAPMGNAQVDPDNKGYILSRTIAFNSNEKITDNFLASLLSENVDLLKLCGATAKGVSKNLNRLYVTIPHSISEQEEIAEFFRKINQLVELQ  
KYKIEHTKSQKQVFLQKMF I  
>K CGA  
KKGYMQKIFSQELRFKDENGNDYPKWEEKKIEDIASQVYGGTPTNTKIKFVWNGDI PWIQSSDVKVNLDLILQOCNKFISKNSIELSSAKLIPANSIAIVT  
RVGVGKLCLEFVDYATSQDFLSLSSLYDKLYSLYSLLYTMKKISANLQGTISIKGITKKELLDSIIKIPHNLEEQQKIGDLFYKIDKYISFNKCKIEMLK  
SLKQGLLKKMF I  
>L TTA  
KKGYMQKIFSQELRFKDENGNDYPNWRTIELKNILENIVDNRGKTPDNAPSEKYPLLEVNALGYRPAIKVSKFVSENTYNNWFREHLKENDILFSTVGV  
NTGIVSLMDNYKAVIAQNIQVGLRVNNNLPFSFIYMLSYKGNQKKIKRIQMGAVQPSVKVSQFKFIKYLVPKDEQEKVAKLLIEIDKLVNKQLIKIELL  
QQRKALLKSMFI  
>P AGG  
KKGYMQKIFSQELRFKDESGNDYDPWEEKLGEVADRVIRKKNKNFESKKPLTISGQLGLIDQTEYFYSKSVSSKNLENYTLIKNGEFAYNKSYNGYPLGA  
IKRLTRYDSGVLSSLYICFSIKSEMSKDFMEAYFDSTHWYREVSGIAVEGARNHGLLNSVNDFFTTILIKYPSLEEQRKIGDFFIKLDRQIELEEQLLEL  
LQQRKALLKSMFI  
>Q ACAY  
KKGYMQKIFSQELRFKDENGEDYSEWEERRFADIFKFNKLRKPIKENLRVKSYPYGGATGIDYVDDFIFDGNVLLIGEDGANIITRSAPLVYLVNGK  
FWVNNHAHILSPLNGNIQYLYQVAELVNYEKYNTGTAPKLNINQNLKI INVVISSTNLEEQQKIGSFLSKLDRQIDLEEQLLELQQRKALLKSMFV  
>S GCA  
KKGYMQKIFSQELRFKDENGNDYDPWTNERLGEVTTVTMGQSPKSVNYTDNSNDTVLIQGNADIENGLINPRIYTREVTKLIQKDEIILTVRAPVGVKLAM  
AQINACIGRVCSIKGDKFLYFLEWFATQNKWIRFSQGSTFESISGNDIRNIHIKIPVEDERTKI ILLNSLDVLSKTDLKIQNLKQKQSLQKIFV  
>U GAY  
KKGYMQKIFSQELRFKDENGEDYDPWEVTTIQNITKYTSSKSSNQYADKDNKSGYPYDAVQEQIGKDSNYDIEESYISILKDAGVGRNLNLRPGKSSVI  
GTMGIYQSNVNDIEFLYRMRVVDFFKYIIGSTIPHLYFKDYSKETLYIPSSIQEQAKIGMFISNLDKLIENKLNKLNKQLKQGLLQSMFI  
>W CRAA  
KKGYMQKIFSQELRFKDENGNDYDPWEEKLQELGELSQIVRGASPRPIKDPKWFNKESDIGNWLRISDVTNQNKGKIYHLEQKLSIEGQEKTRVLVTTLLLSI  
AASIGKPVMNFKVGTGVDGFLIFLKPKNLFFMYWLEFYFKDKWSKYGQPGSQVNLNSEIVKSQTLNMPNSNHEQEKVGFNPNRNEKLIELQEKIMYIKR  
CKQVLLQKMF I  
>Y CTA  
KKGYMQKIFSQELRFKDENGNDYDPWEEKLKEIACVYTGNTPSKKNENIYWNKGEYVWVPTPTDINNKNIESENKLTQEGYKARQLPENTLLVTCIAS  
IGKNAILRKQSGCNQINAVVPFENINIDYLYIISDSLSTFMKSIAGKTATQIVNKNFTFENLEIYLAPFEEQNKIADLISSELEIEKQASKLIKMKSRK  
QGMLQIMFI  
>a\* GAA  
KKGYMQKIFSQELRFKDENGNDYPEWENKRIEDIANVNGKFTPSTNNNEYWNNNDKNWLSIAGMNOQYLYKGNKGISKDAAKNYMKVNDTLIMSFKLTI  
GKLAIKAPLYTNEAICHFIWKVKNINTEFIYLYLNSLNISTFGVQAVKGVTLNNDINSIIVKLPNEEQNI IAKFLEVDKTVNNQLVKTLLKQKQK  
GLLQRMFV  
>c\* GAY  
KKGYLQKIFSQELRFKDENGNDYPEWRFARFKDFMYKPINIRPAINISKSELLTVKLHCKGIEKANINRVLKLGGATNYKRFEGQFIYKQNFNFNGAFDI  
VPKFDGLYSSSDVPAFEINTEKIEPNYFISYISRPSFYKSKKEYSTGTGSKRIHENTVLFNLSLHPLCNEQLKIASFVCFNLRKIELLERKIYLIKQK  
QALLQKMF I  
>d\* CYAA  
KKGYMQKIFSQELRFKDENGNDYPEWENVMLQKVLKDKTEGKIRGPFPGALKKDIFVESGYAVYEQRNAIYDISNFRYINENKYKEMQSFVQPNDIIM  
SCSGTIGRLALIPHNYTKGIINQALIRFRTNHKIRSEFFLIFMRSNQMQRKILEANPGSAITNLPVKELKLIIPFPLPVKFEQDKISQFIHIINRRIEQS  
EKKIESLKNRQKQFLQKLFV  
>f\* GAAY  
KKGYMQKIFSQELRFKDENGEDYDPWEEKLGDITEQSMYIGIGASATRFDSKNYIIRITDIDEKSRKLNQNLTPDELNNKYKLRNDILFARTGASTG  
KSYIHKEEKDIYNYFAGFLIKFKINEQNSPLFIYQFTLTSKFNKWKVMSVRSQPGINSEYAKLPLVLPNKLEQQKIAKFLDRDRQIELEKQKIEI  
LQQQKGLLQSMFI  
>NOVEL 3  
KKGYMQKIFAQELRFKDENGNDYDPWVTKLGDIGKAMNKRIYKNETTENGEIPFYKIGNFGKNADFTITREKFDEYKEYYPNVGDILISASGSIGR  
TIEYTGEDAYYQDSNIVLWLNHNDEVINKYLYFYKIVKWSGIEGTTIKRLYNKNILNTKIELPTVEEQYKMANFLSKLDKIIDIQIEKIELLKQKQGLL  
QKMFV

**SUPPLEMENTARY INFORMATION FOR MATERIALS AND METHODS SECTION  
"CONSTRUCTION OF FURTHER MTASES WITH FURTHER COMBINATIONS OF TRDS  
USING SYNTHETIC GENES."**

The DNA sequence is followed by the predicted amino acid sequence for each TRD. Some synthetic sequences encoded two TRDs.

**CC15 TRD O**

CCCGGGTTTGAAGGCGAATGGGAGGAAAAAACTGGGTGAAGTTGGCACCTTTACCAGCGGTGGC  
ACTCCGCTGAAAAGCAAAGCGAATATTGGAATGGTGATATTCCGTGGATTACCACAGGCGATATT  
CATAACATTAACCGCGAAAACATCACCAACTTTATCACCGAAAAAGGCCTGAATGAAAGCAGCGCA  
AAACTGATTACCAATGAAGCAATTCTGATTGCCATGTATGGTCAGGGTAAAACCCGTGGTATGAGC  
GCCATTCTGAATTTTGAAGCAACCACCAATCAGGCCTGTGCAATTTATCAGACAAACCAGAACATC  
AACTTCGTGTTCCAGTATTTCCAGAAACTGTATGAATTTCTGCGTAGCCTGAGCAATGAAGGTAGC  
CAGAAAAATCTGAGCCTGAGCCTGCTGAAAGAAATTACCCTGAATTATCCGAACGAGCAAGAACAG  
AAAAAATCGGCGATTTCTTCAGCAAACCTGGATCGTCAAATTGAATTAGAAGAACAGAAG

**CC15 TRD O**

PGFEGEWEEKKLGEVGTFTSGGTPLKSKSEYWNGDIPWITTTGDIHNIKRENITNFITEKGLNESSA  
KLITNEAILIAMYGQGKTRGMSAILNFEATTNQACAIYQTNQNINVFVQYFQKLYEFLRSLSNEGS  
QKNLSLSLLKEITLNPNEQEQQKIGDFFSKLDRQIELEEQK

**CC51 TRD P**

CAAATTGAATTAGAAGAACAGAAGCTGGAAGCTGTTTCAGCAGCAGAAAAAAGGCTATATGCAGAAA  
ATCTTTAGCCAAGAGCTGCGCTTTAAAGATGAAAGCGGTAATGATTATCCGGATTGGGAAGAAAA  
GAACTGGGTGAAGTTGCAGATCGTGTGATTCGTAAAAACAAAACTTTGAAAGCAAAAAACCGCTG  
ACCATTAGCGGTCAGCTGGGTCTGATTGATCAGACAGAATATTTAGCAAAAAGCGTGAGCAGCAAA  
AACCTGGAAAACCTATAACCTGATTAACAAACGGCGAGTTTCGCTATAACAAAAGCTATAGCAATGGT  
TATCCGCTGGGTGCAATTAACGTCTGACCCGTTATGATAGCGGTGTTCTGAGCAGCCTGTATATT  
TGCTTTAGCATCAAAGCGAGATGAGCAAAGATTTTCATGGAAGCCTATTTTGATAGCACCCATTGG  
TATCGTGAAGTTAGCGGTATTGCAGTTGAAGGTGCACGTAATCATGGTCTGCTGAATATTAGCGTG  
AACGATTTTTTACCATCCTGATCAAATATCCGAGCCTGGAAGAACAGCGTAAAATCGGTGATTTCT  
TTCATTAAACTGGATCGCCAGATTGAGCTGGAAGAACAAAACTGGAAGCTGCTGCAACAGCGCAAA  
AAAGCACTGCTGAAAAGTATGCTGATCCCCGGGGGATCCGATCGATC

**CC51 TRD P**

QIELEEQKLELFQQQKKGVMQKIFSQELRFKDESGNDYPDWEEKELGEVADR VIRKKNFESKKPL  
TISGQLGLIDQTEYFSKSVSSKNLENYTLIKNGEFAYNKSYNNGYPLGAIKRLTRYDSGVLSLYI  
CFSIKSEMSKDFMEAYFDSTHWYREVSGI AVEGARNHGLLNI SVNDFFTILIKYPSLEEQRKIGDF  
FIKLRQIELEEQKLELLQQRKKALLKSMIL

**CC72-1 TRD R + CC59-1 TRD Q**

CCCGGGTTTGAAGGCGAATGGGAGGAAAAAACTGGGTGAAGTTGGCCAAAATCTATGATGGCACC  
CATCAGACCCCGAAATATAACCAATGAAGGTATCAAATTTCTGAGCGTGGAAAACATCAAACCCCTG  
AATAGCAGCAAATACATTAGCGAAGAAGCCTTCGAGAAAGAATTCAAATTCGTCCGGAATTTGGC  
GATATTCTGATGACCCGTATTGGTGATATTGGCACCCCGAATATTGTTAGCAGCAATGAAAAATTC  
GCCTACTATGTTAGCCTGGCACTGCTGAAAACCAAAAATCTGAACAGCTACTTCTGAAAACCTG  
ATTCTGAGCAGCAGCATTGAGAAATGAACTGTGGCGTAAAACCCCTGCATGTTGCATTTCCGAAAA  
ATCAACAAAAACGAGATCGGCAAAATCAAATCAACTACCCGAAAAACAAGAACAGCAGAAAATC  
GGTCAGTTTTTTCAGCAAACCTGGATCGCCAAATTGAATTAGAAGAACAGAAGCTGGAAGCTGCTGCAA  
CAGCAGAAAAAAGGTTATATGCAGAAAATCTTCAGCCAAGAGCTGCGCTTTAAAGATGAAAATGGT  
GAAGATTATAGCGAGTGGGAAGAACGTCGTTTTGCCGATATTTTCAAATTTTCAACAAACTGCGC  
AAACCGATCAAAGAAAATCTGCGTGTAAAGGCAGCTATCCGTATTATGGTGCAACCGGCATTATT  
GATTATGTGGATGATTTTTATCTTCGATGGCAACTATCTGCTGATTGGCGAAGATGGTGCAACATT  
ATTACCCGTAGCGCACCGCTGGTTTTATCTGGTTAATGGTAAATTTTGGGTGAACAACCATGCCCAT  
ATTCTGAGTCCGCTGAATGGTAATATTCAGTATCTGTATCAGGTTGCCGAAGCTGGTGAAGTATGAA

AAATACAATACCGGCACCGCACAGCCGAAACTGAACATTCAGAATCTGAAAATTATCAACGTGGTG  
ATCAGCACCAATCTGGAAGAACAGCAAAAAATTGGTAGCTTCTGAGCAAACCTGGATCGTCAGATT  
GACCTGGAAGAACAAAACTGGAAGTCTGCAACAACGTAAAAAAGCACTGCTGAAAAGCATGTTC  
GTGCCCGGGGATCCGATCGATC

**CC59-1 TRD Q**

QIELEEQKLELLQQQKKGVMQKIFSQELRFKDENGEDYSEWEERRFADIFKFHNKLRKPIKENLRV  
KGSYPYYGATGIIDYVDDFIFDGNLYLLIGEDGANIITRSAPLVYLVNGKFWVNNHAHILSPLNGNI  
QYLYQVAELVNYEKYNTGTAQPKLNIQNLKIINVVIISTNLEEQQKIGSFLSKLDLDRQIDLEEQKLEL  
LQQRKALLKSMFV

**CC72-1 TRD R**

PGFEGEWEEKLGEVAKIYDGTHQTPKYTNELIKFLSVENIKTLNSSKYISEEAFEKEFKIRPEFG  
DILMTRIGDIGTPNIVSSNEKFAYYVSLALLKTKNLNSYFLKNLILSSSIQNELWRKTLHVAFPKK  
INKNEIGKIKINYPPKQEQQKIGQFFSKLDRQIELEEQK

**CC75-1 TRD T and TRD U**

CCCGGGTTTGAAGGCGAATGGGAGGAAAAAGAACTGGGCGAAATCTTTCAGATTATTAGCGGTAGC  
ACACCGCTGAAAAGCAACAAAGAATTTTATGAGAACGGCAACATCAACTGGGTAAAACCACCGAT  
CTGAATAATAGCAAAGTGACCCATAGCAAAGAAAAAATCACCGAGTATGCAATGAAAAGCCTGAAA  
CTGAAACTGGTGCCGAAAAATAGCGTTCTGATTGCAATGTATGGTGGCTTTAATCAGATTGGTCGT  
ACCGGTCTGCTGAAAATTGATGCAACCATTAATCAGGCAATTAGCGCACTGCTGATGAATCATGAA  
ACCAACCCGGAATTTATTTCAGGCCTTTCTGAATTATCAGGTGAAAGGTTGGAAACGTTATGCAGCA  
AGCAGCCGTAAAGATCCGAATATCACCAAAAAAGATATCGAACAGTTCAAAGTGCCGTACGTGAGC  
ATTAATGAACAGCAGAAAAATTGGCGAGTTTTTTAGCAAAATCGATCATCAAATGAAATTAGAAGAA  
CAGAAGCTGGAAGTCTGCAACAGCAGAAAAAAGGTTATATGCAGAAAATCTTCAGCCAAGAGCTG  
CGCTTTAAAGATGAAAATGGTGAAGATTATCCGGATTGGGAAGTTACCACCATTGAGAACATTACC  
AAATACACCAGCAGCAAAAAAAGCAGCAATCAGTATGCCGATAAAGACAACAGCAAAGGTTATCCG  
GTTTATGATGCCGTTCAAGAAATGGCAAAGATAGCAACTATGACATCGAAGAGAGCTATATCAGC  
ATTCTGAAAGATGGTGCCGGTGTGGTCTGCTGAATCTGCGTCCGGGTAAAAGCAGCGTTATTGGC  
ACCATGGGTATATTTCAGAGCAACAACGTGGATATCGAGTTCCTGTATTATCGTATGAAAGTGGTG  
GACTTCAAAAAATACATTATCGGTAGCACCATTCCGCACCTGTATTTCAAAGATTATAGCAAAGAA  
ACCCTGTACATTCCGAGCAGCATTCAAGAACAGGCAAAAAATTGGTATGTTTCATCAGCAACCTGGAT  
AAACTGATCGAGAACAAAAACCTGAAACTGAACTGTCTGAAACAACCTGAAACAGGGATTGCTACAA  
TCTATGTTTTATTCCCGGGGGATCCGATCGATC

**CC75-1 TRD T**

PGFEGEWEEKELGEIFQIISGSTPLKSNKEFYENGNINWVKTDLNNSKVTHSKEKITEYAMKSLK  
LKLVPKNSVLIAMYGGFNQIGRTGLLKIDATINQAI SALLMNHETNPEFIQAFLNYQVKGWKRYAA  
SSRKDPNITKKDIEQFKVPYVSINEQQKIGEFFSKIDHQIELEEQK

**CC75-1 TRD U**

QIELEEQKLELLQQQKKGVMQKIFSQELRFKDENGEDYDWEVTTIQNITKYTSSKSSNOYADKD  
NSKGYPVYDAVQIEIGKDSNYDIEESYISILKDGAGVGRNLNLRPGKSSVIGTMGYIQSNNVDIEFLY  
YRMKVVDFFKYIIGSTIPHLFYFKDYSKETLYIPSSIQEQAKIGMFI SNLDKLIENKNLKNLCLKQL  
KQGLLQSMFI

**CC75-2 TRD V**

CCCGGGTTTGAAGGCGAATGGGAGGAAAAAGAACTGCGTGAAGTGGCAATCCGAAAGATAAATAC  
AGCTATACCGGTGGTCCGTTTGGTAGCGATCTGAAAAAAGCGATTATACCACCGATGGCATTTCAG  
ATTATTCAGCTGCAGAATATTGGTGACGGCTATTTCTATAACAGCAACAAAGTGTTCACAGCAAC  
GAAAAAGCCGAAGTCTGAAAAGCTGTAATGTTTTTCCGGGTGATATTGTGATTGCCAAAATGGCA  
GATCCGATTGCACGTGCCGCAATTGTTCCGGATAATAACATTGGTAAATACCTGATGGCCAGTGAT  
GGTATTCGTCTGAGCGTTGATACCGTTCATTTTAACACCAAATTTGTGCTGGAATGCATCAACCGT  
AAAAGCTTTCGTAAAAAAGTCGAGGATAATAGCAGCGGTAGCACCCGTATGCGTATTGGTCTGAGT  
ACCCTGGGTAGCCTGACCTGAAAACCACCACCTGAAAAGAACAGCAGAAAAATTGGTCAGTTTTTC

AGCAAACCTGGATCGTCAAATTGAATTAGAAGAACAGAAG

**CC75-2 TRD V**

PGFEGEWEEKELRELRNPKDKYSYTGPFSGDLKSDYTTDGIQIIQLQNIQDGYFYNSNKVFSTN  
EKAEVLKSCNVFPGDIVIAKMAPIARAAIVPDNNIGKYLMSDGIKSVLTVHFNTKVFLECI  
KSFRRKVEDNSSGSTRMRIGLSTLGLSLTLKTTTLKEQQKIGQFFSKLDRQIELEEQK

**CC75-2 TRD W**

CAAATTGAATTAGAAGAACAGAAGCTGGAACCTGCTGCAACAGCAGAAAAAAGGTTATATGCAGAAA  
ATCTTCAGCCAAGAGCTGCGCTTTAAAGATGAAAATGGTAACGATTATCCGGATTGGGAAGAAAA  
CAGCTGGGTGAACTGAGCCAGATTGTTCTGTTGGTGCAAGTCCGCGTCCGATTAAAGATCCGAAATGG  
TTTAAACAAAGAAAGCGATATTGGTTGGCTGCGCATTAGTGATGTTACCAATCAGAATGGCAAAATC  
TATCATCTGGAACAGAACTGAGCATCGAAGGTCAAGAAAAAACCCTGTTCTGGTTACCACCCAT  
CTGCTGCTGAGCATTGCAGCAAGCATTGGTAAACCGGTTATGAACTTTGTGAAAACCGGTGTGCAT  
GATGGCTTTCTGATTTTTCTGAAACCGAAATTC AACCTGTTCTTTATGTACTATTGGCTGGAATAT  
TTCAAAGATAAATGGTCCAAATATGGTCAGCCTGGTAGCCAGGTTAATCTGAATAGCGAAATGTT  
AAAAGCCAGACCCTGAATATGCCGAGCAATCATGAACAAGAAAAAGTGGGCCAGTTTTTTAAACCGC  
AACGAAAAACTGATTGAACTGCAGCAAGAGAAAAATCATGTATATCAAACGTTGCAAACAGGTGCTG  
CTGCAAAAAATGTTTATTCCCGGGGGATCCGATCGATC

**CC75-2 TRD W**

QIELEEQKLELLLQQQKKGMYMOKIIFSQELRFKDENGNDYPDWEEKQLGELSQIVRGASPRPIKDPKW  
FNKESDIGWLRISDVTNQNNGKIYHLEQKLSIEGQEKTRVLVTTHLLLSIAASIGKPV MNFVKTG  
VH DGFLIFLKPKNLFFMYWLEYFKDKWSKYGQPGSQVNLNSEIVKSQTLNMPSNHEQEKVQGFNR  
NEKLIELQQEKIMYIKRCKQVLLQKMF I

**CC80-1 TRD X and TRD Y**

CCCGGTTTTGAAGGCGAATGGGAGGAAAAACAGTTTTGCCGACTTCACCAAAATTAACCAGGGTCTG  
CAGATTGCCATTAATGAACGTAAAACCGAATATAGCCCTGAGCTGTATTTCTATATCACCAACGAA  
TTTTCTGCGTCCGAATAGCCAGACCAAATATTTTCATTGAAAATCCGCCTCAGAGCGTGATTGCCAAC  
AAAGAAGATATTCTGATGACCCGCACCGGTAATACCGGCAAAGTTGTTACCAATGTTTTTGGTGCC  
TTCCACAACAACCTTTTTCAAATCAAATTCGATAAAAACCTGTATGATCGCCTGTTTCTGGTTGAA  
GTTCTGAACAGCAGCAAAAATCCAGAACAAAATTCAGCCTGGCAGGTAGCAGCACCATTCCGGAT  
CTGAATCATAGCGATTTCTATAGCATTAGCAGCAGCTATCCGCTGCTGCGCGAACAGCAAAAAATT  
GGCAAATTTCTTAGCAAACTGGATCGTCAAATTGAATTAGAAGAACAGAAGCTGGAACCTGCTGCAA  
CAGCAGAAAAAAGGTTATATGCAGAAAATCTTCAGCCAAGAGCTGCGCTTTAAAGATGAAAATGGT  
AACGATTATCCGGATTGGGAGAAAAAAAACCTGAAAGAAATTGCCTGCGTGTATACCGGTAATACC  
CCGAGCAAAAAAGAAAACATCTATTGGAACAAAGGCGAGTATGTTTGGTTACCCCGACCGATATT  
AACAAACAGCAAAAACATTTATGAAAGCGAAAACAACTGACCCAAGAAGGCTACAAAAAAGCACGT  
CAGCTGCCGGAAAAATACCTGCTGGTTACCTGTATTGCAAGCATTGGTAAAAATGCCATTCTGCGT  
AAACAGGGTAGCTGTAATCAGCAGATTAATGCAGTTGTGCCGTTTGAGAACATCAACATCGATTAT  
CTGTATTATATCAGCGATAGCCTGAGCACCTTCATGAAAAGCATTGCAGGTAAAACCGCAACCCAG  
ATTGTGAACAAAAACACCTTTGAAAACCTGGAAATTTACCTGGCACCTTTTGAGGAACAGAACAAA  
ATTGCAGATCTGATTAGCAGCCTGGAAGAACTGATTGAAAAACAGGCAAGCAAACTGATCAAAATG  
AAAAGCCGCAAACAGGGCATGCTGCAGATTATGTTTATTCCCGGGGGATCCGATCGATC

**CC80-1 TRD X**

PGFEGEWEEKQFADF TKINQGLQIAINERKTEYSPELYFYITNEFLRPNSQTKYFIENPPQSVIAN  
KEDILMTRTGNTGKVVTVNFVGFHNNFFKIKFDKNLYDRLFLVEVLNSSKIQNKILSLAGSSTIPD  
LNHSDFYSISSYPLLREQQKIGKFFSKLDRQIELEEQK

**CC80-1 TRD Y**

QIELEEQKLELLLQQQKKGMYMOKIIFSQELRFKDENGNDYPDWEKKLKEIACVYTGNTPSKKENIYW  
NKGEYVWVTPDINNSKNIYESENKLTQEGYKKARQLPENTLLVTCIASIGKNAILRKQSGCNQOI  
NAVVPFENINIDYLYIISDSLSTFMKSIAGKTATQIVNKNTFENLEIYLAPFEEQNKIADLISSLE  
ELIEKQASKLIKMSRKQGMLQIMFI

**CC80-2 TRD Z + CC72-2 TRD S**

CCCGGGTTTTGAAGGCGAATATTCTCTGGATATTTTTGGTAATCTGGCCACCAACAAAAGCGAAAA  
TTCAATCCGCAGAATGAAAACGCCAGCATTTGATATTGAACTGGATTGCATTGAACAGAATACCGGT  
CGTCTGATCAAAATCTATAACAGCAAAGAATTTAGCAGCCAGAAAAACAAATTTAACCCGCAGAAC  
GTGCTGTATGGTAAACTGCGTCCGTATCTGAACAAATATTACTTCACCAAAAAAAGTGGTGTGTGC  
AGCAGCGAAATTTGGGTTCTGAAAAGCACCAAGAAGATAAACTGCTGAACCTGTTCCCTGTACTAT  
TTCATTCAGACCAAACGCTATAGTGATGTTGCAAGCAAAGCGCAGGTAGCAAATGCCTCGTGCA  
GATTGGGGTCTGATTGAAAATATTCTGTGTATTTTTCCGGAAGTGTGCGAACAGCAGAAAATGGT  
CAGTTTTTTTAGCAAACCTGGACCGTCAAATTTGAATTAGAAGAACAGAAGCTGGAAGTGTGCAACAG  
CAGAAAAAAGGTTATATGCAGAAAATCTTCAGCCAAGAGCTGCGCTTTAAAGATGAAAATGGTAAC  
GATTATCCGGACTGGACCAATGAACGTCTGGGTGAAGTTACCACCGTTACCATGGGTGAGAGCCCG  
AAAAGCGTGAATTATACCGATAATAGCAATGACACCGTTCTGATTCAGGGTAATGCCGATATTGAA  
AACGGTCTGATTAATCCGCGTATCTATAACCGTGAAGTGACCAAACCTGATTCAGAAAGATGAGATT  
ATTCTGACCGTTCGTGCACCGGTTGGTAAACTGGCAATGGCACAGATTAATGCATGTATTGGTCGT  
GGTGTTCGAGCATTAAAGGCGATAAATTTCTGTATTATTTCTGGAATGGTTCGCCACCCAGAAT  
AAATGGATTCGTTTTAGCCAGGGTAGCACCTTTGAAAGCATTAGCGGTAATGATATTCGCAACATC  
CATATCAAATCCCGGTTGAAGATGAACGCACCAAATTTATCAAACCTGCTGAATAGCCTGGATGTG  
CTGAATTCAAAACCGATCTGAAAATCCAGAATCTGAAACAGCGTAAACAGAGCCTGCTGCAAAAA  
ATCTTTGTGCCCGGGGATCCGATCGATC

**CC80-2 TRD Z**

PGFEGEYSLDIFGNLATNKSEKFNPNENASIDIELDCIEQNTGRLIKIYNSKEFSSQKNKFNPNQ  
VLYGKLRPYLNKYYFTKKSVCSSSEIWLKSTKEDKLLNLFLLYYFIQTKRYSVASKSAGSKMPRA  
DWGLIENIRVYFPELCEQQKIGQFFSKLDRQIELEEQK

**CC72-2 TRD S**

QIELEEQKLELLLOQQKGYMQKIFSQELRFKDENGNDYPDWTNERLGEVTTVTMGQSPKSVNYTDN  
SNDTVLIQGNADIENGLINPRIYTREVTKLIQKDEIILTVRAPVGLAMAQINACIGRGVCSIKGD  
KFLYYFLEWFATQNKWIRFSQGSTFESISGNDIRNIHIKIPVEDERTKI IKLLNSLDVLSKTDLK  
IQNLKQRKQSLLOKIFV

**CC93-2 TRD b\***

CCCGGGTTTTGAAGGCGAATGGGAGGAGAAAAAACTGGAAGATACCCTGGAATTCATTAAAGATGGC  
ACCCATGGTACACATGAAAATGTTAATAATGGTCCGTGGCTGCTGAGCGCCAAAAACATTA AAAAC  
AACAAAATCATCATCAGCAGCGACGATCGCAAAATTAGCGAAAGCGATTACAAAAAATCTACAAA  
AACTATAAACTGAAAAAGGCGATCTGCTGCTGACCATTGTTGGCACCATTGGTTCGTGCAGCAATT  
GTTAAAAATCCGAACAATATTGCCTTTCAGCGTAGCGTTGCAATCCTGAAAACCAAAGCAACCTAT  
GATGTGGGCTTTATCTTTTCAGCTGTTCCAGACCAAATACTTTAAAAACCTGCTGCTGCGTAAACAG  
GTTGTTAGCGCACAGCCTGGTCTGTATCTGGGTGATATTCGTAAAATCAAATCAGCATTACCAAC  
ATCATCGAAGAACAGCGCAAAATCGGTATCTTTTTCAGCAAACCTGGATCGTCAAATTTGAATTAGAA  
GAACAGAAG

**CC93-2 TRD b\***

PGFEGEWEEKKLEDTFLEFIKDGTHGTHENVNNGPWLLSAKNIKNNKIIISSDDRKISESDYKKIYK  
NYKLEKGDLLLITIVGTIGRAAIVKNPNNIAFQRSVAILKTKATYDVGFIFQLFQTKYFKNLLLRKQ  
VVSAQPGLYLGDIRKIKISITNIEEQRKIGIFFSKLDRQIELEEQK

**C93-3 TRD a\***

CAAATTGAATTAGAAGAACAGAAGCTGGAAGTGTGCAACAGCAGAAAAAAGGTTATATGCAGAAA  
ATCTTCAGCCAAGAGCTGCGCTTTAAAGATGAAAATGGTAACGATTATCCGGAATGGGAAAACAAA  
CGCATTGAAGATATTGCCAATGTGAACAAAGGTTTTACCCCGAGCACCACAATAACGAATATTGG  
GATAACAACGATAAAAACTGGCTGAGCATTGCAAGCATGAATCAGAAATATCTGTATAAAGGCAAC  
AAAGGCATCAGCAAAGATGCAGCCAAAAACTATATGAAAGTGAAAAACGACACCCTGATCATGTCC  
TTTAAACTGACCATTGGTAAACTGGCGATTGTTAAAGCACCGCTGTATACCAATGAAGCCATTTGT  
CATTTTATCTGGAAAGTGAACAAAATCAACACCGAGTTCATCTACTATTACCTGAACAGCCTGAAC  
ATTAGCACCTTTGGTGTTCAGGCAGTTAAAGGTGTTACCCTGAATAACGATAGCATCAACAGCATT

ATTGTGAAACTGCCGAATGAAGAGGAACAGAACATTATCGCAAAATTTCTGCTGGAAGTGGACAAA  
ACCGTTAATAATCAGCTGGTAAAACCAAACCTGCTGAAACAACGTAATAAAGGCCTGCTGCAGCGT  
ATGTTTGTTCCTCGGGGATCCGATCGATC

**CC93-3 TRD a\***

QIELEEQKLELLQQQKKGMYMOKIIFSQELRFKDENGNDYPEWENKRIEDIANVKNKGFPTSTNNNEYW  
DNNDKNWLSIAGMNQKYLYKGNKGI SKDAAKNYMKVKNDTLIMSFKLTIGKLAIVKAPLYTNEAIC  
HFIWKVNKINTEFIYYLNSLNI STFGVQAVKGVTLNND SINSIIVKLPNEEEQNI IAKFLLEVDK  
TVNNQLVKTKLLKQRKKGLLQRMFV

**CC873 TRD e\* + CC97 TRD c\***

CCCGGGTTTTGAAGGCGAATGGGAGGAAAAATCGATCAGCAGCTTTCTGAAAGAAAGCAAATCAA  
GGTAGCAATGGTAGCCATGCAAAAAAACTGACCGTTAAACTGTGGGGTAAAGGTGTTGTTCCGAAA  
AAAGAAACGTTTAAAGGCAGCGATAACACCCAGTATTACAAACGTAAGCAGGTCAGCTGATGTAT  
GGCAAACCTGGATTTTCTGAATTGCGCCTTTGGTATTGTTCCGGATAGCCTGAATAACTATGAAAGC  
ACCATTGATAGCCCAGCTTTGATTTTATTAATGGCGATAGCAAATTTCTGCTGGAACGCATTAA  
CTGAAAAGCTTCTACAAAAAATTCGGCGATATTGCAAATGGCAGCCGTAAAGCAAACGTATTAAT  
CAGGATACCTTTCTGAGCTGCCGGTTTTTGCACCGAAATATGATGAACAGCTGCGTATTGGTGAA  
TTTTTTCAGTAAACTGGATCGTCAAATTGAATTAGAAGAACAGAAGCTGGAACCTGCTGCAACAGCAG  
AAAAAAGGTTATCTGCAGAAAATCTTTAGCCAAGAGCTGCGCTTTAAAGATGAAAACGGTAATGAT  
TATCCGGAATGGCGTTTTGCCCCGTTTCAAAGATTTTATGTACAAACCGATTAATATCCGTCCGGCA  
ATCAACATTAGCAAAAAGCGAACTGCTGACCGTTAAACTGCATTGCAAAGGTATTGAAAAGCCAAC  
ATTAACCGTGTGCTGAAACTGGGTGCAACCAATTATTACAAACGTTTTGAAGGCCAGTTTATCTAT  
GGCAAACAGAACTTTTTTAAACGGTGCCTTTGATATCGTGCCGAAAAAATTCGATGGTCTGTATAGC  
AGCAGTGATGTTCCGGCATTGAAATCAATACCGAGAAAATTGAGCCGAACACTACTTCATCAGCTAT  
ATTAGCCGTCCGAGCTTCTATAAAAGCAAAGAGAAATATAGCACCGGCACCGGTAGCAAACGTATT  
CATGAAAATACCGTGCTGAACTTTAGCCTGCATCTGCCGTGTCTGAATGAACAGCTGAAAATTGCA  
AGCTTTGTGTGCTTTCTGAACCGTAAAATTGAACTGCTGGAACGCAAATCTATCTGATCAAAAA  
CAGAAACAGGCCCTGCTGCAGCAAATGTTTATTCCCGGGGGATCCGATCGATC

**CC873 TRD e\***

PGFEGEWEEKS ISSFLKESKIKGSNGSHAKKLTVKLWKGKGVVPPKETFKGS DNTQYYKRKAGQLMY  
GKLDFLNCAFGIVPDSLNNYESTIDSPSDFINGDSKFLLERIKLSFYKKGFDIANGSRKAKRIN  
QDTFLSLPVFAPKYDEQLRIGEFFSKLDRQIELEEQK

**CC97 TRD c\***

QIELEEQKLELLQQQKKGYLQKIFSQELRFKDENGNDYPEWRFARFKDFMYKPINIRPAINISKSE  
LLTVKLVHCKGIEKANINRVLKLGATNYYKRFEGQFIYKQNFNNGAFDIPKFDGLYSSSDVPAF  
EINTEKIEPNYFISYISRPSFYKSKEKYSTGTGSKRIHENTVNLNFSLHLPCLNEQLKIASFVCFLN  
RKIELLERKIYLIKKQKQALLQQMFI

**CC133-2 from ED133 TRD d\***

CAAATTGAATTAGAAGAACAGAAGCTGGAACCTGCTGCAACAGCAGAAAAAAGGTTATATGCAGAAA  
ATCTTCAGCCAAGAGCTGCGCTTTAAAGATGAAAATGGTAACGATTATCCGGAATGGGAAAATGTG  
ATGCTGCAGAAAGTTCTGAAAGATAAAACCGAAGGTATTAAACGTTGGTCCGTTTGGTGGTGCACCTG  
AAAAAAGATATTTTTGTGGAAAGCGGCTATGCCGTTTATGAACAGCGTAATGCCATTTATGATATC  
AGCAACTTCCGCTACTATATCAACGAGAACAAATACAAAGAGATGCAGAGCTTTAGCGTTCAGCCC  
AATGATATTATCATGAGCTGTAGCGGCACCATTGGTTCGTCTGGCACTGATTCCGCATAACTATAACC  
AAAGGTATTATCAACCAGGCCCTGATTCTGTTTTCTGACCAATCATAAAATCCGCAGCGAATTCTTT  
CTGATCTTTATGCGTAGCAATCAGATGCAGCGTAAAATTTCTGGAAGCAAATCCGGGTAGCGCAATT  
ACCAATCTGGTTCGGTTAAAGAAGCTGAAACTGATCCCGTTTTCCGCTGCCGGTTAAATTTGAACAG  
GATAAAATCAGCCAGTTCATCCACATTATTAACCGTCGTATTGAACAGAGCGAGAAAAAATCGAA  
AGCCTGAAAAATCGCAAACAGGGTTTTCTGCAGAACTGTTTTGTTCCCGGGGGATCCGATCGATC

**CC133-2 from ED133 TRD d\***

QIELEEQKLELLQQQKKGMYMOKIIFSQELRFKDENGNDYPEWENVMLQKVLKDKTEGIKRGPFGGAL  
KKDIFVESGYAVYEQRNAIYDISNFRYYINENKYKEMQSFSVQPNDIIMSCSGTIGRLALIPHNYT



KGIINQALIRFRTNHKIRSEFFLI FMRSNQMQRKILEANPGSAITNLVPVKELKLIPFPLPVKFEQ  
DKISQFIHIINRRIEQSEKKIESLKNRKQGFLOKLFV

**ST80-3 TRD X + TRD f\***

CCCGGGTTTTGAAGGCCAATGGGAGGAAAAACAGTTTTGCCGATTTTACCAAATAAACCAGGGTCTG  
CAGATTGCCATTAATGAACGTAAAACCGAATATAGCCCTGAGCTGTATTTCTATATCACCAACGAA  
TTTCTGCGTCCGAATAGCCAGACCAAATATTTCAATTGAAAATCCGCCTCAGAGCGTGATTGCCAAC  
AAAGAAGATATTCTGATGACCCGCACCCGGTAATACCGGCAAAGTTGTTACCAATGTTTTTGGTGCC  
TTCCACAACAACCTTTTTCAAATCAAATTCGATAAAAACCTGTATGATCGCCTGTTTTCTGGTTGAA  
GTTCTGAACAGCAGCAAAATCCAGAACAAAATTCTGAGCCTGGCAGGTAGCAGCACCATTCCGGAT  
CTGAATCATAGCGATTTCTATAGCATTAGCAGCAGCTATCCGCTGCTGCGCGAACAGCAAAAAATT  
GGCAAATTCTTTAGCAAACCTGGATCGCCAGATTGAACTGGAAGAACAGAACTGGAACCTGCTGCAA  
CAGCAGAAAAAAGGCTATATGCAGAAAATCTTTAGCCAAGAGCTGCGCTTTAAAGATGAAAACGGT  
GAAGATTATCCGGATTGGAAAGAAAAAAACTGGGCGATATTACCGAGCAGAGCATGTATGGTATT  
GGTGCAAGCGCAACCGTTTTGATAGCAAAAATATCTATATCCGCATCACCGACATCGATGAAAAAA  
GCCGTAAACTGAATTATCAGAATCTGACCACACCCGGATGAACTGAACAATAAATACAACTGAAAC  
GCAACGACATCCTGTTTTGCACGTACCCGGTGCAAGTACCGGTAAAAGCTATATTCATAAAGAAGAGA  
AAGACATCTACAACACTACTTTTGCGGGTTTTCTGATCAAATTCAAAATTAACGAACAGAACAGTC  
CGCTGTTTCATCTATCAGTTTACCCTGACCAGCAAATTCACAAAATGGGTAAAGTTATGAGCGTGC  
GTAGCGGTCAGCCTGGTATTAATAGCGAAGAATATGCAAAACTGCCGCTGGTTCTGCCGAATAAAC  
TGGAACAACAAAAAATCGCGAAATTCCTGGATCGTTTTGATCGTCAGATCGAGCTGGAAAAACAAA  
AAATTGAAATCTGTCAGCAACAAAAAAAAGGCCTGCTGCAGAGTATGTTTATTTCCCGGGGGATCCG  
ATCGATC

**ST80-3 TRD X**

MSNTQKKNVPELRFPGFEGEWEEKQFADF TKINQGLQIAINERKTEYSPELYFYITNEFLRPNSQT  
KYFIENPPQSVIANKEDILMTRTGNTGKVVTNVFGAFHNNFFKIKFDKNLYDRLFLVEVLNSSKIQ  
NKILSLAGSSTIPDLNHSDFYSSISSYPLLREQQKIGKFFSKLDR

**ST80-3 TRD f\***

QIELEEQKLELLQQKKGVMQKIFSQELRFKDENGEDYDPWKEKKLGDITEQSMYGIGASATRFDS  
KNIYIRITDIDKSRKLNQNLTPDELNNKYKLRNDILFARTGASTGKSYIHKEEKDIYNYIFA  
GFLIKFKINEQNSPLFIYQFTLTSKFNKWKVMSVRSQPGINSEEYAKLPLVLPNKLEQQKIAKF  
LDRFDRQIELEKQKIEILQQQKGLLQSMFIPGGSHHHHHH

SUPPLEMENTARY INFORMATION FOR TABLE 2.

**S. SauCD-EGFP**

**CC30-1 GWAG-5-GAT**

**This MTase was expressed and purified as a fusion with EGFP.**

MSNTQTKNVPELRFPGFEGEWEEKKVGELLEFKNGLNKGKEYFGSGSSIVNFKDVFNNRSLNTNNL  
 TGKVVNNSKELKNYSVEKGDVFFTRTSEVIGEIGYPSVILNDPENTVFSGFVLRGRPKSGIDLINN  
 NFKRYVFFTNSFRKEMITKSSMTTRALTSGSAINMKMVIYPVSAKEQRKIGDFFSKLDRQIELEEQ  
 KLELLQQQKKGVMQKIFSQELRFKDENSEDYPHWENSKIEKYLKERNERSDKGQMLSVTINSGIIK  
 FSELDKDNSSKDKSNYKVVRKNDIAYNSMRMQGASGRSNYNGIVSPAYTVLYPTQNTSSLFIGY  
 KFKTHRMIHKFKINSQGLTSDTWNLYKQQLKNINIDIPVLEEQEKIGDFFKKMDILISKQKIKIEI  
 LEKEKQSFLQKMFLGSMVSKGEELFTGVVPILVELDGDVNGHKFSVSGEGEDATYGLTLKFICT  
 TGKLPVPWPTLVTTLTYGVCFSRYPDHMKQHDFFKSAMPEGYVQERTIFFKDDGNYKTRAEVKFE  
 GDTLVNRIELKGIDFKEDGNILGHKLEYNNSHNVYIMADKQKNGIKVNFKIRHNIEDGSVQLADH  
 YQONTPIGDGPVLLPDNHYLSTQSALS KDPNEKRDHMLLEFVTAAGITLGMDELYKHHHHHH

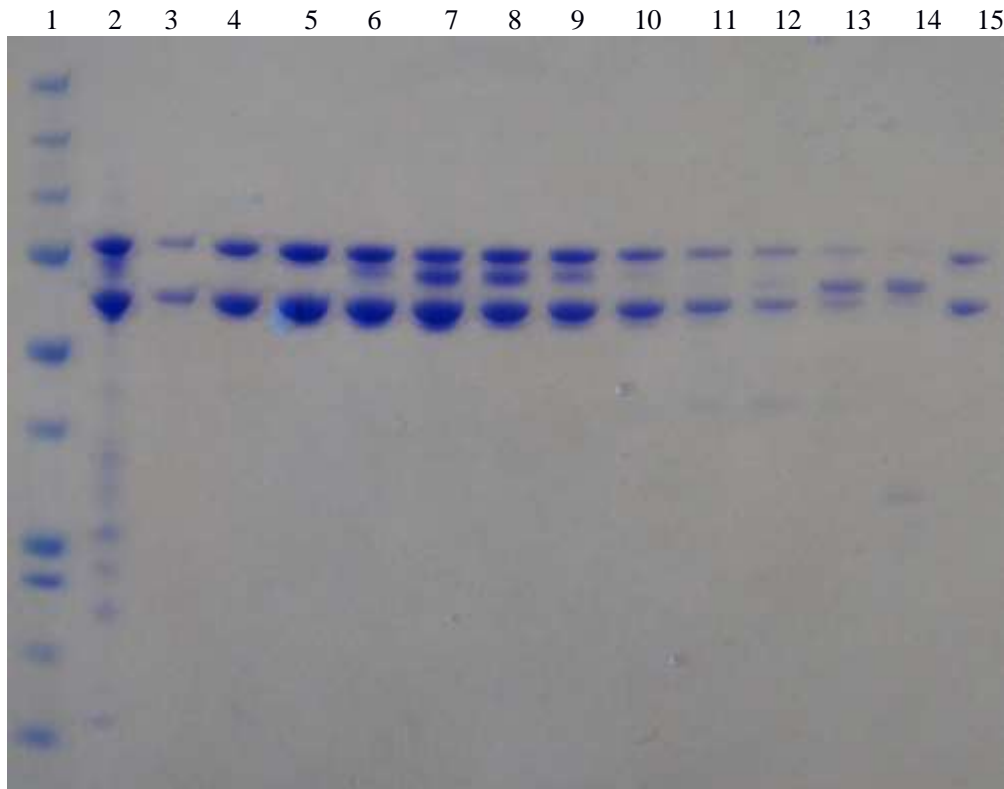

1- marker    2- Nickel column eluate    3-14 Fractions from gel filtration column  
 15- CC5-1 Purified protein marker

Nuclease assay on the plasmid library.

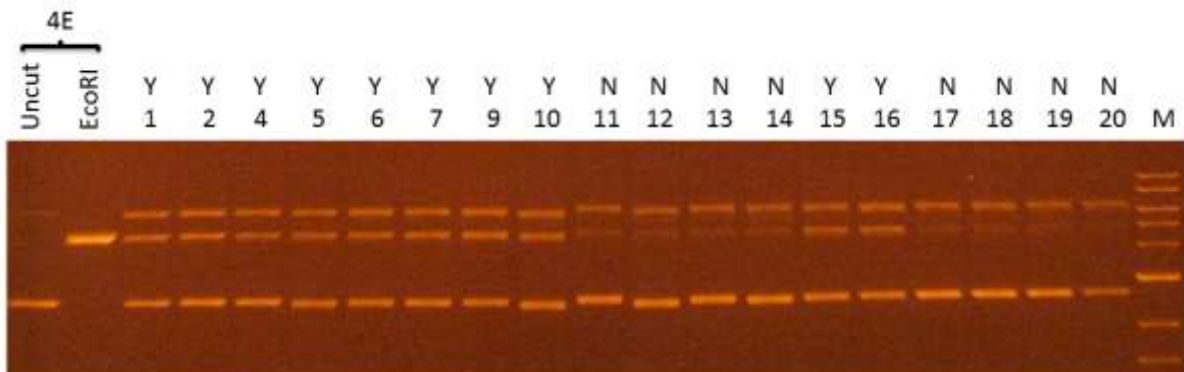

S. SauCD-EGFP

CC30-1 GWAG-5-GAT

SMRT did not work for the CC30-1 system when looking for methylation of genomic DNA from *E. coli*.

| Motif         | Modified Position | Modification Type | % Motifs Detected | # Of Motifs Detected | # Of Motifs In Genome | Mean Modification QV | Mean Motif Coverage | Partner Motif |
|---------------|-------------------|-------------------|-------------------|----------------------|-----------------------|----------------------|---------------------|---------------|
| BNNGGTAMH     | 4                 | unknown           | 7.05              | 780                  | 11058                 | 37.7                 | 88.6                |               |
| ANNNNNNDNNNH  | 1                 | unknown           | 0.11              | 1312                 | 1235059               | 36.0                 | 100.7               |               |
| Not Clustered | 0                 |                   | 0.19              | 14583                | 7880091               | 36.1                 | 107.4               |               |

### Modification QV Histogram By Motif

Modification QV Histogram

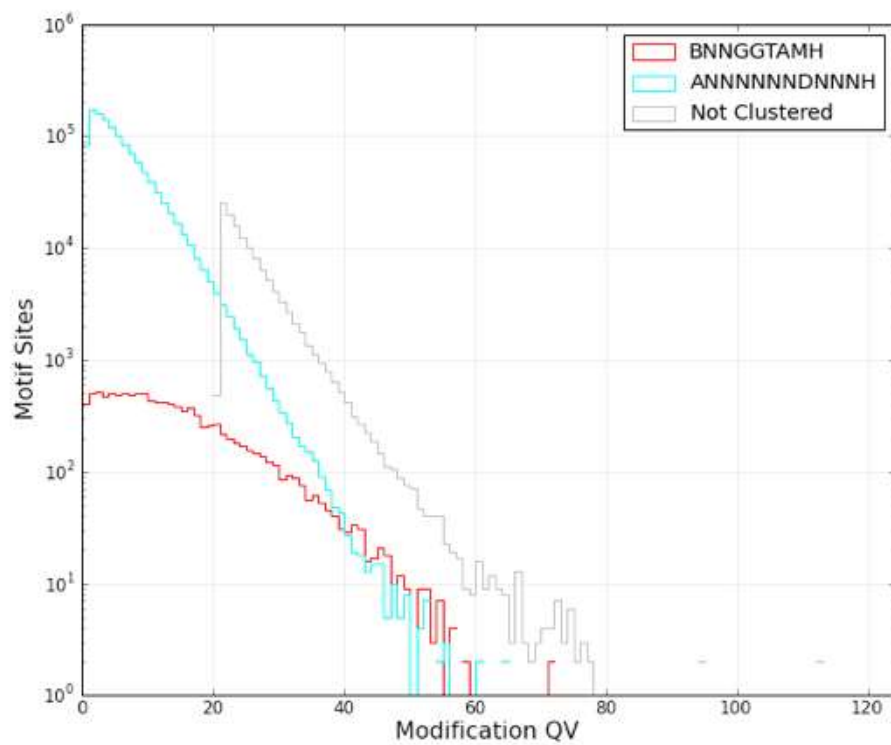

S. SauJK-EGFP

CC30-2 GGA-7-TCG

This MTase was a fusion with EGFP.

MSNTQKKNVPELRFPEFEGEWEERKLGDLIKVNSGKDYKHLDKGDIPVYGTGGYMTSVSEPLSEID  
AVGIGRKGKTINKPYLLEAPFWTVDTLIFYCTPEKEADILFILSLFRKINWKLYDESTGVPSSLKQTI  
NKINRLVPTNKEQQKIGEFFSKLDRQIELEEQKLELLQQQKGYMOKIFSQELRFKDENGNDYPKW  
EEKKIEDIASQVYGGGTPNTKIKEFWNGDIPWIQSSDVKVNDLILQQCNKFISKNSIELSSAKLIP  
ANSIAIVTRVGVGKLCLEFDYATSQDFLSLSSSLKYDKLYSLYSLLYTMKKISANLQGTSIKGITK  
KELLDISI IKIPHNLEEQQKIGDLFYKIDKYISFNKCKIEMLSLQGLLKKMFIGSMVSKGEELFT  
GVVPILVELDGDVNGHKFSVSGEGEGDATYGLTLKFICTTGKLPVPWPPTLVTTLTLYGVQCFSRYP  
DHMKQHDFFKSAMPEGYVQERTIFFKDDGNYKTRAEVKFEGDTLVNRIELKGI DFKEGDNILGHKL  
EYNYNSHNVYIMADKQKNGIKVNFKIRHNIEDGSVQLADHYQQNTPIGDGPVLLPDNHYLSTQSAL  
SKDPNEKRDHMLLEFVTAAGITLGMDELYKHHHHHH

This system could not be expressed so was used for SMRT sequencing only.

SMRT analysis of genomic DNA from *E. coli*.

| Motif         | Modified Position | Modification Type | % Motifs Detected | # Of Motifs Detected | # Of Motifs in Genome | Mean Modification QV | Mean Motif Coverage | Partner Motif |
|---------------|-------------------|-------------------|-------------------|----------------------|-----------------------|----------------------|---------------------|---------------|
| CGANNNNNNTCC  | 3                 | m6A               | 98.76             | 1439                 | 1457                  | 89.3                 | 76.9                | GGANNNNNNTCG  |
| GGANNNNNNTCG  | 3                 | m6A               | 98.56             | 1436                 | 1457                  | 91.2                 | 76.8                | CGANNNNNNTCC  |
| Not Clustered | 0                 |                   | 0.09              | 8260                 | 9123294               | 35.7                 | 87.7                |               |

Modification QV Histogram By Motif

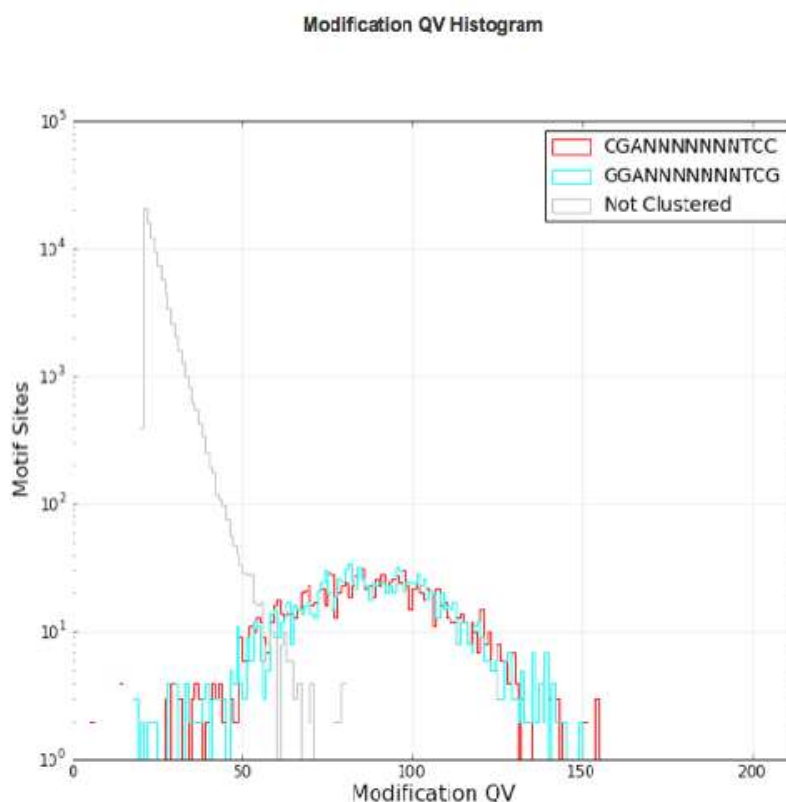

**S.SauJd\***

**CC133-2 from ED133 GGA-7-TTRG**

**This enzyme was studied using the SMRT assay. There are minor variations in S subunit sequence in CC133-2.**

**Recombinant S.SauJd\* CC133-2**

MSNTQKKNVPELRFPGFEGEWEEKKLGDLIKVNSGKDYKHLEKGDIPVYGTGGYMTSVSEPLSEID  
 AVGIGRKGKTINKPYLLEAPFWTVDTLIFYCTPKKETDILFILSLFRKINWKVYDESTGVP SLSKQTI  
 NKINRFVPSNKEQQKIGEFFIKLDRQIELEEQKLELLQQQKKG YMQKIFSQELRFKDENGNDYPEW  
 ENVMLQKVLKDKTEGIKRGPFGGALKKDI FVESGYAVYEQRNAIYDISNFRYYINENKYKEMQSFS  
 VQPNDIIMSCSGTIGRLALIPHNYTKGIINQALIRFR TNHKIRSEFFLIFMRSNQMQRKILEANPG  
 SAITNLVPVKELKLIPFPLPVKFEQDKISQFIHI INRRIEQSEKKIESLKNRKQGFLQKLFVPGGS  
 HHHHHH

**Wild type S.SauJd\***

MSNTQKKNVPELRFPGFEGEWEEKKLESIIKVNSGKDYKHLDKGDIPVYGTGGYMTSVSEPLSEID  
 AVGIGRKGKTINKPYLLEAPFWTVDTLIFYCTPKKETDILFILSLFRKINWKVYDESTGVP SLSKQTI  
 NKINRFVPTNKEQQKIGKFFSKLDRQIELQE QKLELLQQQKKG YMQKIFSQELRFKDENGNDYPEW  
 ENVMLQKVLKDKTEGIKRGPFGGALKKDI FVESGYAVYEQRNAIYDISNFRYYINENKYKEMQSFS  
 VQPNDIIMSCSGTIGRLALIPHNYTKGIINQALIRFR TNHKIRSEFFLIFMRSNQMQRKILEANPG  
 SAITNLVPVKELKLIPFPLPVKFEQDKISQFIHI INRRIEQSEKKIESLKNRKQGFLQKLFV\*

**Reports for Job Dryden\_J\_delta\_MODs**

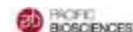

SMRT Cells: 1 Movies: 1

**Motif Summary**

| Motifs         | Modified Position | Type | % Motifs Detected | # Of Motifs Detected | # Of Motifs In Genome | Mean Modification QV | Mean Motif Coverage | Partner Motif  |
|----------------|-------------------|------|-------------------|----------------------|-----------------------|----------------------|---------------------|----------------|
| CYAANNNNNNTCC  | 4                 | m6A  | 90.36%            | 422                  | 467                   | 51.19                | 30.33               |                |
| GGANNNNNNHTRG  | 3                 | m6A  | 47.67%            | 1114                 | 2337                  | 45.72                | 32.24               |                |
| CYAAYBNNNNMCC  | 4                 | m6A  | 25.68%            | 169                  | 658                   | 42.89                | 34.51               |                |
| CCBANTNNNNNTCC | 4                 | m6A  | 20.39%            | 42                   | 206                   | 44.40                | 32.14               | GGANNNNNANTVGG |
| GGANNNNNANTVGG | 3                 | m6A  | 18.45%            | 38                   | 206                   | 44.76                | 31.37               | CCBANTNNNNNTCC |

**Modification QVs**

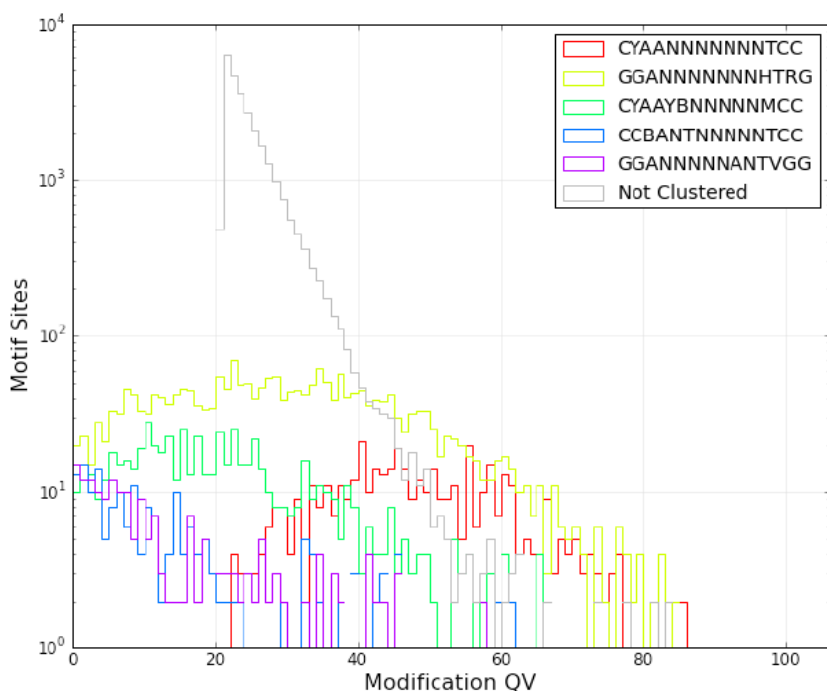

**S. SauNE**

**CC398-1 ACC-5-RTGA**

The clone obtained contained a single amino acid substitution A50S which did not affect activity. The enzyme was expressed using plasmid pSauNE-XmaI.

**S. SauNEXmaI "Expected" sequence**

MSNTQKKNVPELRFPGFEGEWEEKKLGEFAGKVTQKNVDKKYIETLTNSAELGIISQKDYFDKEIS  
NIDNIKKYYVVEENDFVYNPRMSNYAPFGPVNRNKLGKKGVMSPLYTVFKIQNIDLNFIEFYFKSS  
KWYRFMALNGDSGARADRFSIKDRTFMEMPLHIPCMDEQIKIGQFFSKLDRQIELEEQKLELLQQQ  
KKGVMQKIFSQELRFKDENGKDYPEWEETTIKEIAQINTGKKDTKDAITNGSYDFYVRSPIVYKIN  
TFSYEGEAILTVGDGVGVGKVFHYVNGKFDYHQRVYKISDFKNYYGLLLFYFYSQNFLKETKKYSA  
KTSVDSVRKDMIANKVPRPIYIEQKKIGQFIKRVDNKTKIQQQVIELLKQRKSSLLQKMFIPGGS  
HHHHHH\*

**S. SauNEXmaI "Actual" sequence**

MSNTQKKNVPELRFPGFEGEWEEKKLGEFAGKVTQKNVDKKYIETLTNSSELGIISQKDYFDKEIS  
NIDNIKKYYVVEENDFVYNPRMSNYAPFGPVNRNKLGKKGVMSPLYTVFKIQNIDLNFIEFYFKSS  
KWYRFMALNGDSGARADRFSIKDRTFMEMPLHIPCMDEQIKIGQFFSKLDRQIELEEQKLELLQQQ  
KKGVMQKIFSQELRFKDENGKDYPEWEETTIKEIAQINTGKKDTKDAITNGSYDFYVRSPIVYKIN  
TFSYEGEAILTVGDGVGVGKVFHYVNGKFDYHQRVYKISDFKNYYGLLLFYFYSQNFLKETKKYSA  
KTSVDSVRKDMIANKVPRPIYIEQKKIGQFIKRVDNKTKIQQQVIELLKQRKSSLLQKMFIPGGS  
HHHHHH\*

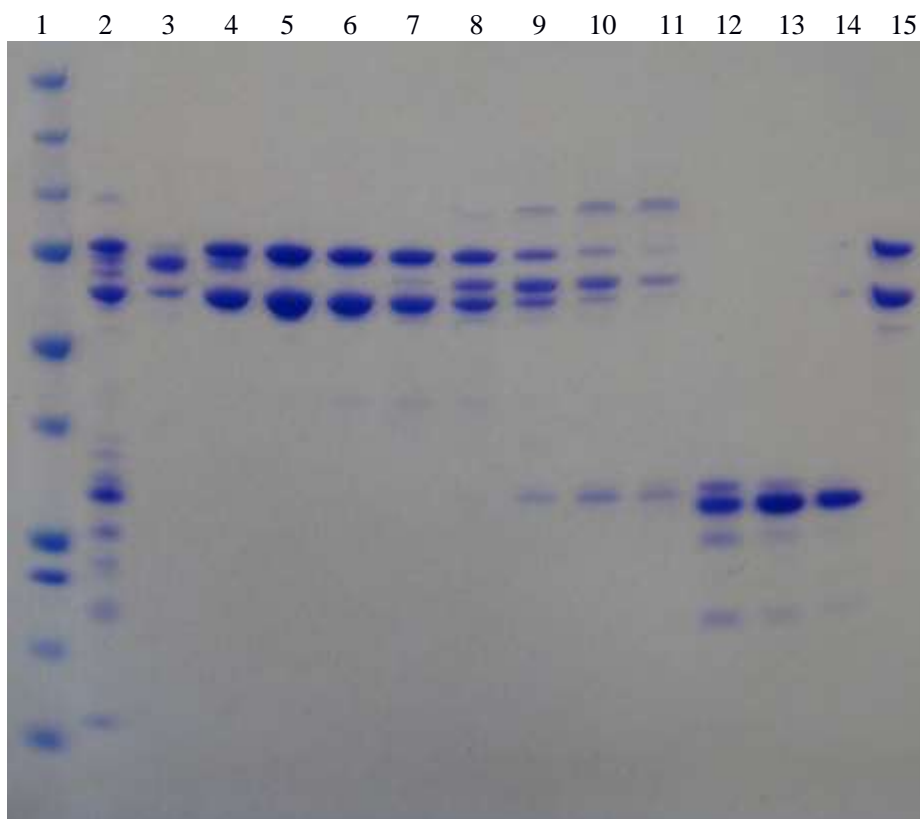

1- marker    2- Nickel column eluate    3-14 Fractions from gel filtration column  
15- CC5-1 purified protein marker

SMRT Cells: 1 Movies: 1

| Motif Summary  |                   |      |                   |                      |                       |                      |                     |               |
|----------------|-------------------|------|-------------------|----------------------|-----------------------|----------------------|---------------------|---------------|
| Motifs         | Modified Position | Type | % Motifs Detected | # Of Motifs Detected | # Of Motifs In Genome | Mean Modification QV | Mean Motif Coverage | Partner Motif |
| ACCNNNNNRTGA   | 1                 | m6A  | 99.69%            | 971                  | 974                   | 89.04                | 57.17               | TCAYNNNNNGGT  |
| TCAYNNNNNGGT   | 3                 | m6A  | 99.69%            | 971                  | 974                   | 90.00                | 57.86               | ACCNNNNNRTGA  |
| ACCNNNNHRTGGB  | 1                 | m6A  | 49.07%            | 291                  | 593                   | 54.17                | 60.71               | VCCAYDNNNNGGT |
| VCCAYDNNNNGGT  | 4                 | m6A  | 45.36%            | 269                  | 593                   | 54.62                | 61.85               | ACCNNNNHRTGGB |
| ACCNNNNHRAGA   | 1                 | m6A  | 41.75%            | 200                  | 479                   | 48.38                | 61.76               |               |
| HTCARNNNNNGGTV | 4                 | m6A  | 36.31%            | 264                  | 727                   | 51.22                | 62.33               |               |
| ACCNNNNNYTGAD  | 1                 | m6A  | 34.9%             | 320                  | 917                   | 49.93                | 60.88               |               |

### Modification QVs

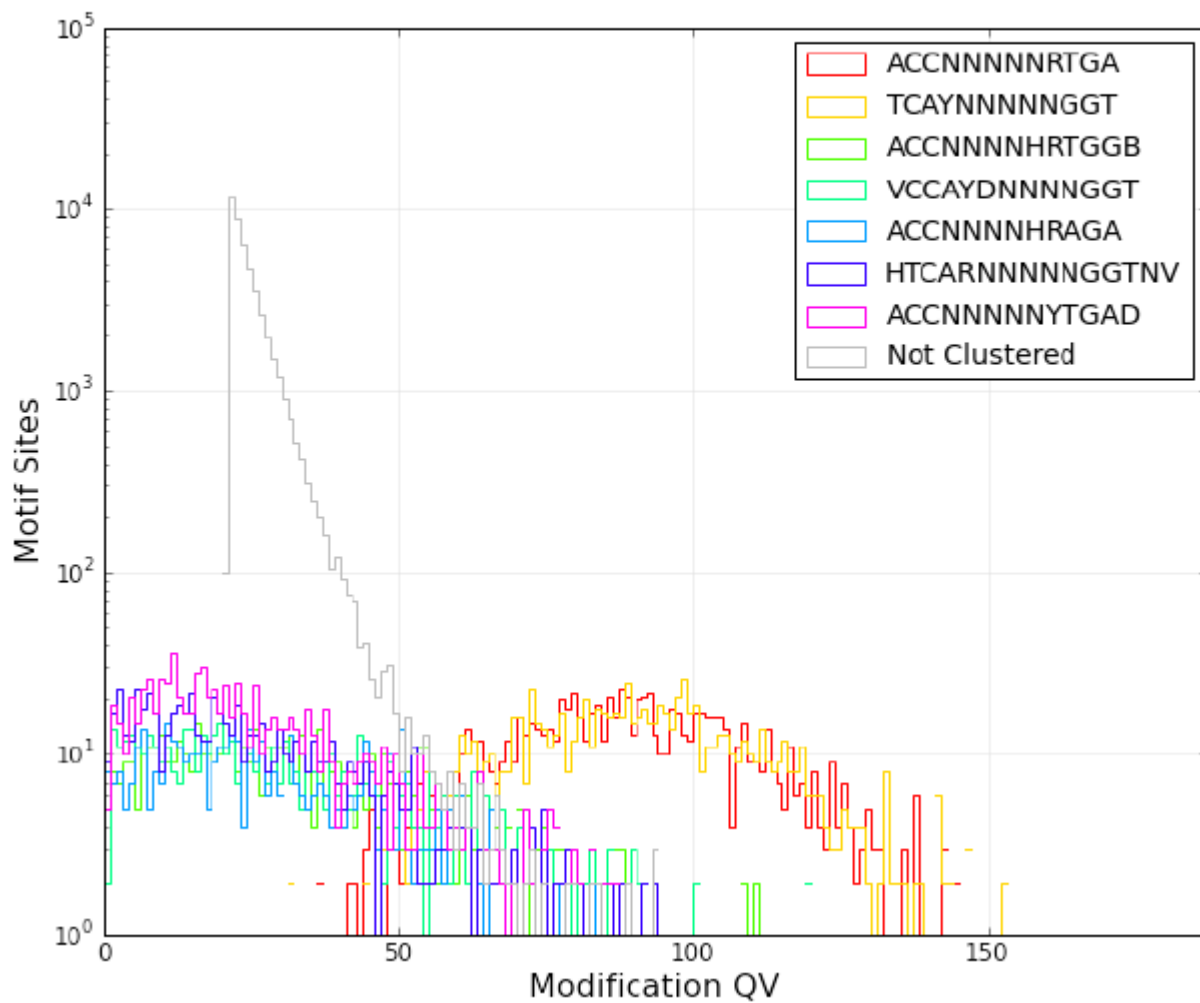



SUPPLEMENTARY INFORMATION FOR TABLE 3.

**S.SauBE AGG-5-RTGA**

This MTase was purified but cut all the plasmids in the nuclease assay. Therefore once the targets for each TRD had been determined from other MTases, we used the ATPase assay to verify the length of the non-specific spacer.

MSNTQKKNVPELRFPGFEGEWEEKKLGDLTDRVIRKKNKNLESKKPLTISGQLGLIDQTEYFSKSVS  
 SKNLENYTLIKNGEFAYNKSYNGYPLGAIKRLTRYDSGVLSSLYICFSIKSEMSKDFMEAYFDST  
 HWYREVSGIAVEGARNHGLLNVS VNDFFTTILIKYPSLEEQQKIGKFFSKLDRQIELEEQKLELLQQ  
 QKKGVMQKIFSQELRFKDENGKDYPEWEETTIKEIAQINTGKKDTKDAITNGSYDFYVRSPIVYKI  
 NTFSYEGEAILTVGDGVGVGKVFHYVNGKFDYHQRVYKISDFKNYYGLLLFYFYSQNFLKETTKYS  
 AKTSVDSVRKDMIANKVPRPIYIEQKKIGQFIKRVDNKTKIQKQVIELLKQRKSSLLQKMFIPGG  
 SHHHHHH

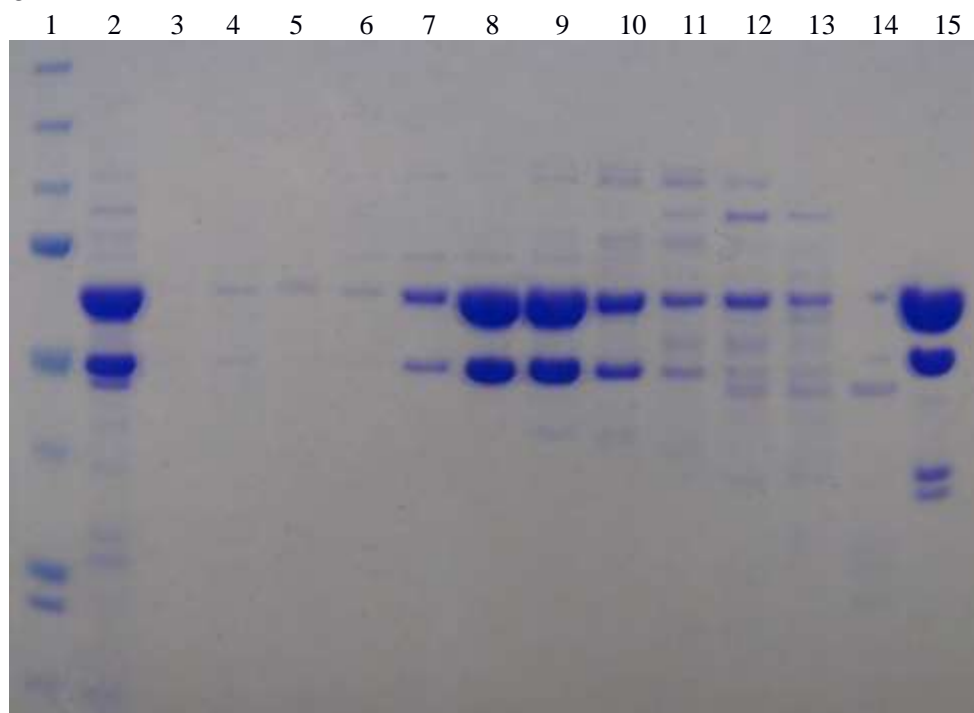

1- marker 2- Nickel column eluate 3-14 Fractions from gel filtration column  
 15- CC398-1 purified protein marker

**Oligonucleotides for checking BE target site using ATPase assay.**

Underlined refers to methylated bases.

5' -AGG-N-RTGA-3'

3' -TCC-N-YACT -5'

N values may be 4-6 i.e., number of base pairs between methylated adenines of 7-9. However, DNA digests show that pUC19 contains the site. This rules out the possibility of N=4 (i.e., no site in pUC19 for N value of 4). Therefore we checked for N5 and N6 only.

| Oligonucleotide name | DNA sequence (5' to 3')                         |
|----------------------|-------------------------------------------------|
| BE5for               | AGATGATGGAATCAATGCAGGTTCCAGTGAGCCCTATACGATATAA  |
| BE5rev               | TTATATCGTATAGGGCTCACTGGAACCTGCATTGATTCCATCATCT  |
| BE6for               | AGATGATGGAATCAATGCAGGTTACAGTGAGCCCTATACGATATAA  |
| BE6rev               | TTATATCGTATAGGGCTCACTGTGAACCTGCATTGATTCCATCATCT |

**S. SauBE** AGG-5-RTGA

N=5 gives the most activity therefore we conclude from the ATPase assay that the site for the BE TRD combination is AGG-5-RTGA.

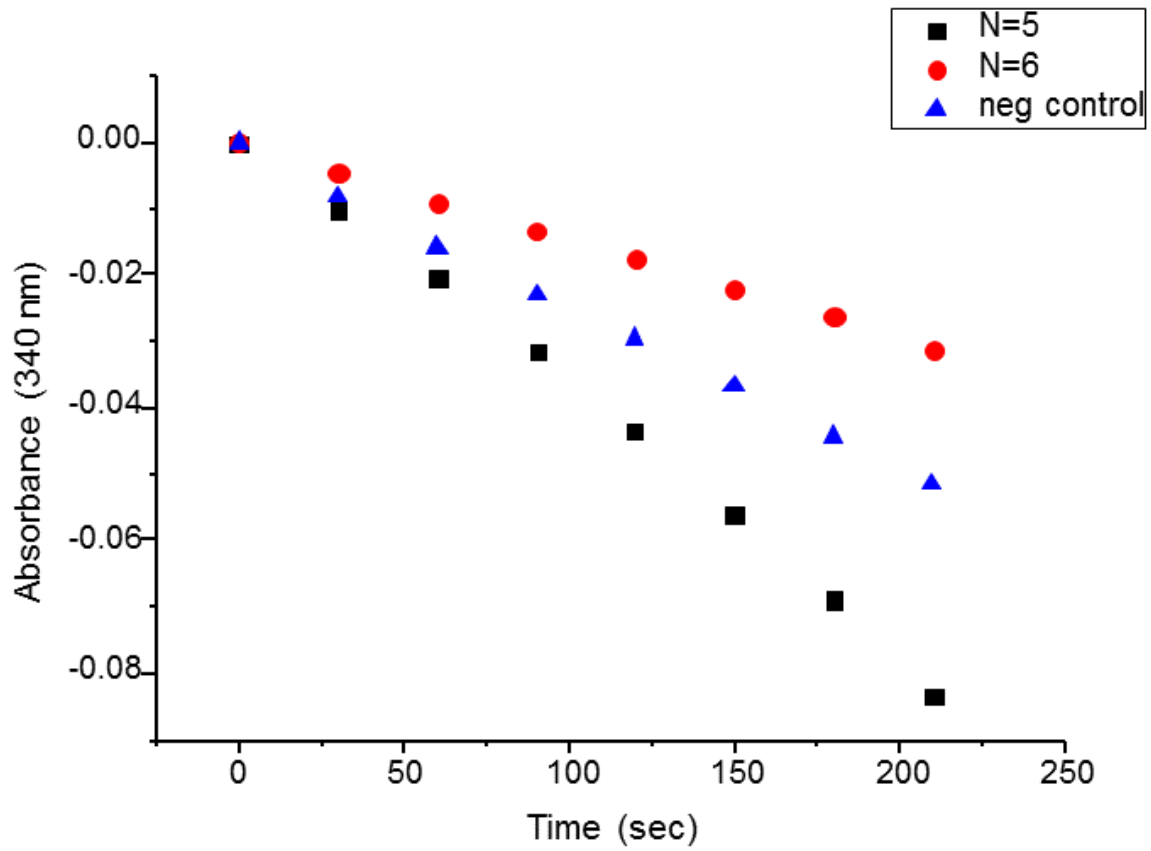

**S.SauJE GGA-6-RTGA**

This MTase was used in both nuclease and SMRT assays. The TRD pair JE occurs in other ST groups namely ST49 and ST50.

MSNTQKKNVPELRFPGFEGEWEEKKLGDLIKVNSGKDYKHLEKGDIPVYGTGGYMTSVSEPLSEID  
 AVGIGRKGKTINKPYLLEAPFWTVDTLFYCTPKKETDILFILSLFRKINWKVYDESTGVPSSLKQTI  
 NKINRFVPSNKEQQKIGEFFIKLDRQIELEEQKLELLQOQKKGVMQKIFSQELRFKDENGKDYPEW  
 EETTIKEIAQINTGKKDTKDAITNGSYDFYVRSPIVYKINTFSYEGEAILTVGDGVGKVFHYVN  
 GKFDYHQRVYKISDFKNYYGLLLFYFYSQNFLKETKKYSAKTSVDSVRKDMIANMKVPRPIYIEQK  
 KIGQFIKRVDNKTKIQKQVIELLKQRKKSLLQKMFIPGGSHHHHHH

1 2 3 4 5 6 7 8 9 10 11 12 13 14 15

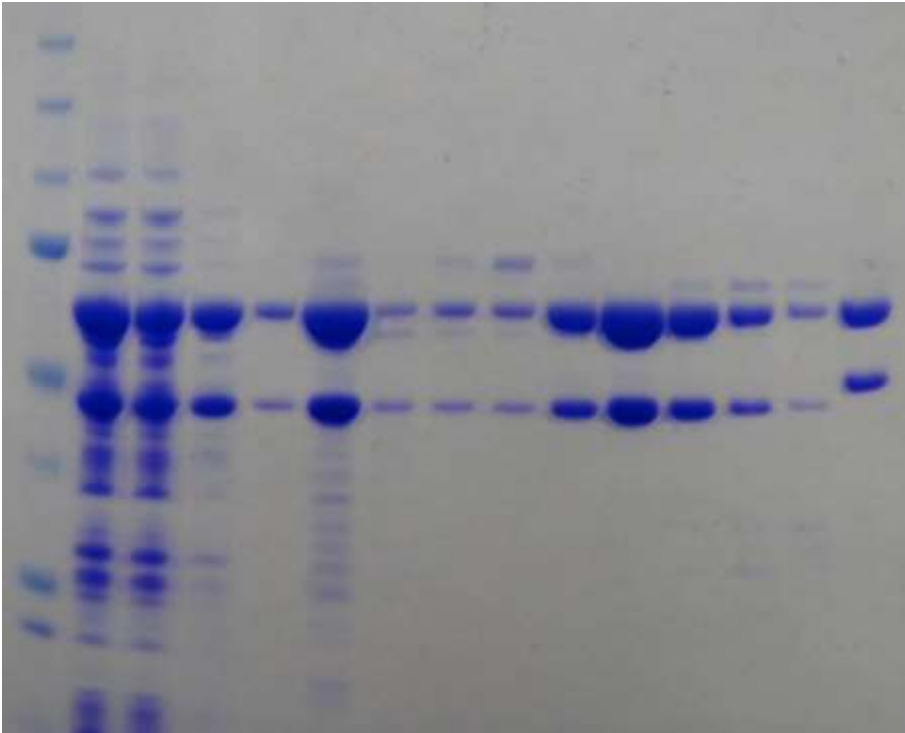

1- marker 2- soluble cell extract 3- Nickel column flow through 4- Nickel column wash 1  
 5- Nickel column wash 2 6- Nickel column eluate 7-14 Fractions from gel filtration column  
 15- CC398-1 purified protein marker

Possible site: GGANNNNNNRTGA Note that the background linearisation may be due to the enzyme displaying star activity against a similar site (i.e., a single GGAN7RTGA site is found in pUC19) to the real site (GGAN6RTGA). Repeated digests generate an identical pattern of digestion.

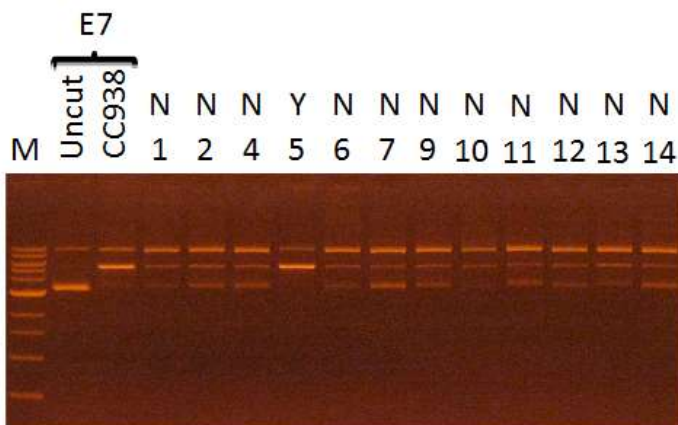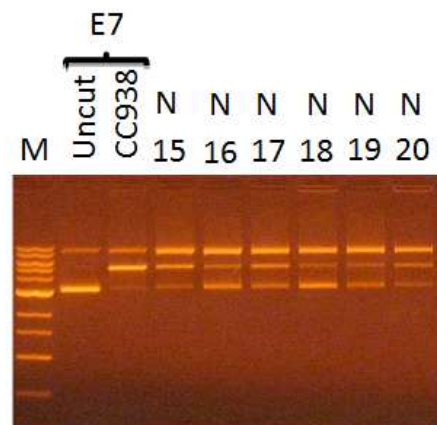

**S. SauJE** **GGA-6-RTGA**

SMRT data showed only the N=6 spacer giving modification.

SMRT Cells: 2 Movies: 2 [Print](#) [Download](#) [Email](#)

| Motif                | Modified Position | Modification Type | % Motifs Detected | # Of Motifs Detected | # Of Motifs In Genome | Mean Modification QV | Mean Motif Coverage | Partner Motif |
|----------------------|-------------------|-------------------|-------------------|----------------------|-----------------------|----------------------|---------------------|---------------|
| TCAYNNNNNTCC         | 3                 | m6A               | 31.44             | 305                  | 970                   | 38.3                 | 17.1                | GGANNNNNRTGA  |
| GGANNNNNRTGA         | 3                 | m6A               | 24.43             | 237                  | 970                   | 38.3                 | 17.5                | TCAYNNNNNTCC  |
| <i>Not Clustered</i> | 0                 |                   | 0.00              | 324                  | 9,124,268             | 34.2                 | 15.8                |               |

**S. SauNI ACC-6-TGAR**

MSNTQKKNVPELRFPGFEGEWEEKKLGEFAGKVTQKNVDKKYIETLTNSAELGIISQKDYFDKEIS  
 NIDNIKKYYVVEENDFVYNPRMSNYAPFGPVNRNKLGKKGVMSPLYTVFKIQNIDLNFIEFYFKSS  
 KWYRFMALNGDSGARADRFSIKDRTFMEMPLHIPCMDEQIKIGQFFSKLDRQIELEEQKLELLQQQ  
 KKGYMQKIFSQELRFKNENGNNDYPDWERIKFFDVIDKVIDFRGRTPKKLNMEWSDEGYLALSAVNV  
 KKGYIDFNVEAKYGNLDLYTRWMRGNELYKGQVLFTEAPMGNVAQVPDNKGYILSORTIAFNSNE  
 KITDNFLASLLSSENVYNDLLKLCGATAKGVSQKNLNRLYVTIPHSISEQEEIAEFFRKNINQLVE  
 LQYKIEHTKSQKQVFLQKMFIPGGSHHHHHH

1 2 3 4 5 6 7 8 9 10 11 12 13 14 15

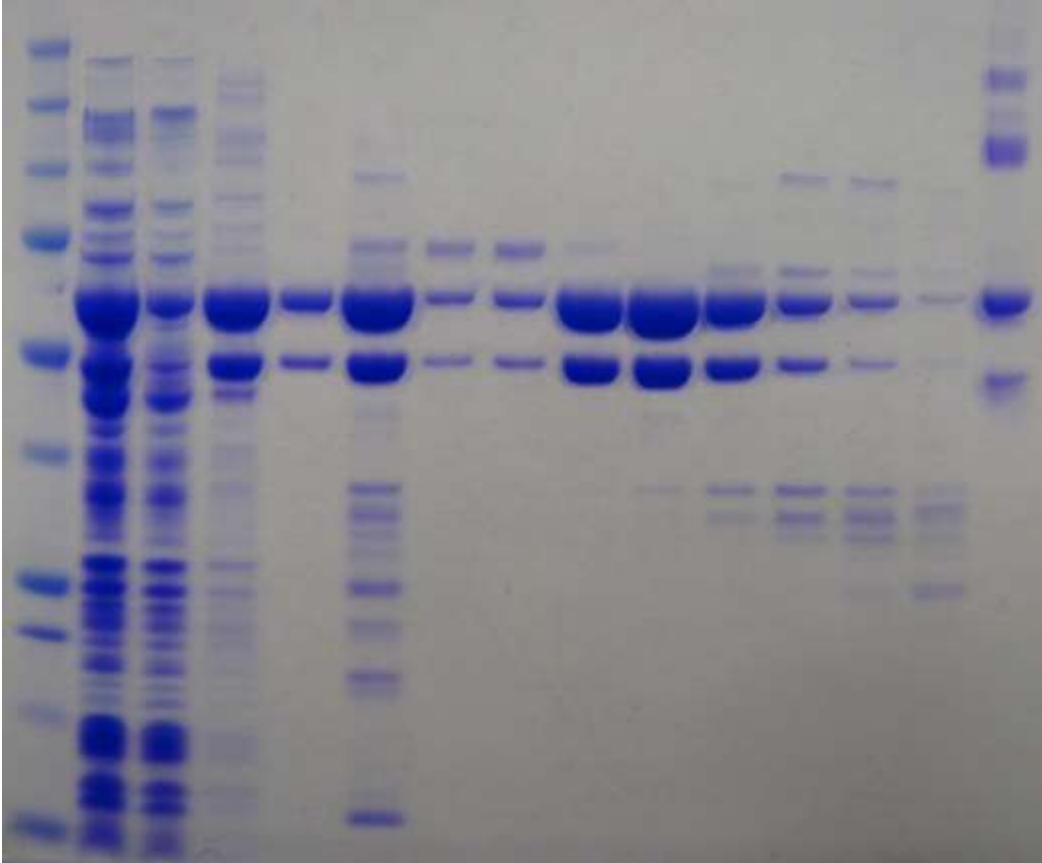

1- marker 2- soluble cell extract 3- Nickel column flow through 4- Nickel column wash 1  
 5- Nickel column wash 2 6- Nickel column eluate 7-14 Fractions from gel filtration column  
 15- CC398-1 purified protein marker

Nuclease assay on the plasmid library gave a clear result.

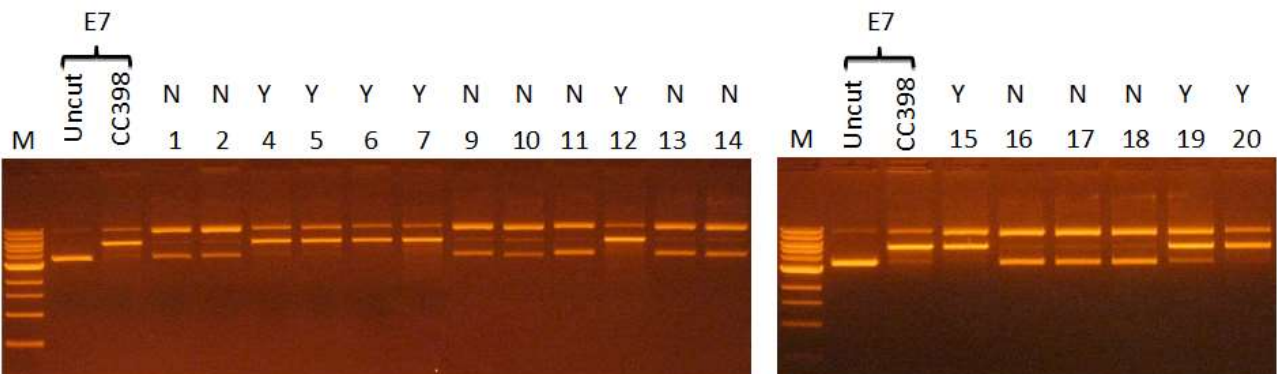

**S. SauNK ACC-6-TCG**

MSNTQKKNVPELRFPGFEGEWEEKKLGEFAGKVTQKNVDKKYIETLTNSAELGIISQKDYFDKEIS  
 NIDNIKKYYVVEENDFVYNPRMSNYAPFGPVNRNKLGKKGVMSPLYTVFKIQNIDLNFIEFYFKSS  
 KWYRFMALNGDSGARADRFSIKDRTFMEMPLHIPCMDEQIKIGQFFSKLDRQIELEEQKLELLQQQ  
 KKGYMQKIFSQELRFKDENGNDYPNWEKKIEDIASQVYGGGTPNTKIKEFWNGDIPWIQSSDVKV  
 NDLILRQCNKFISKNSIELSSAKLIPANSIAIVTRVGVGKLCLEFDYATSQDFLSLSLKYDKLY  
 SLYSLLYTMKKISANLQGTSIKGITKKELLDSEIKIPHNLEEQKIGDLFYKIDKYISFNKCKIEI  
 LKSLKQGLLQKIFIPGGSHHHHHH

1 2 3 4 5 6 7 8

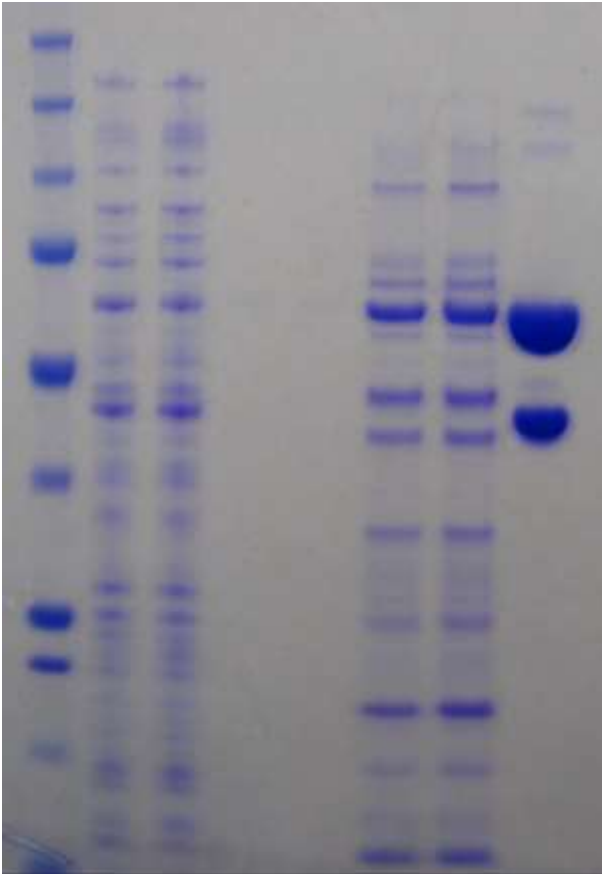

1- marker 2- soluble cell extract 3- Nickel column flow through  
 4- Nickel column wash 1 5- Nickel column wash 2 6- Nickel column eluate  
 7- Eluate after PD10 desalting 8- CC398-1 purified protein marker  
 Nuclease assay gave a clear result.

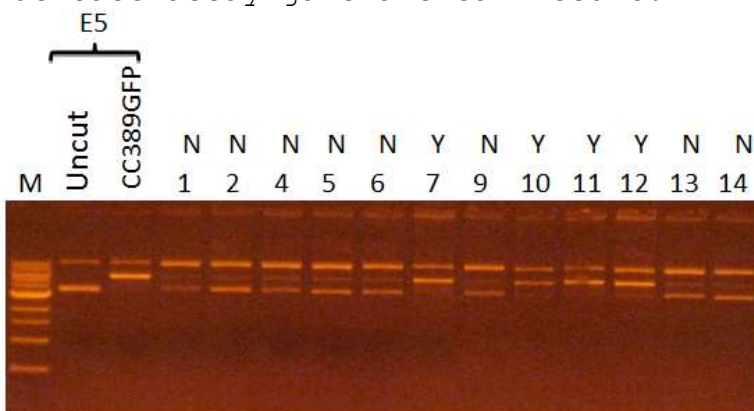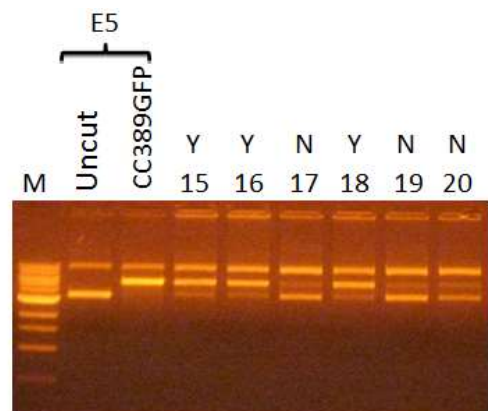

**S. SauNI ACC-6-TAAA**

MSNTQKKNVPELRFPGFEGEWEEKKLGEFAGKVTQKNVDKKYIETLTNSAELGIISQKDYFDKEIS  
 NIDNIKKYYVVEENDFVYNPRMSNYAPFGPVNRNKLKGGVMSPLYTVFKIQNIDLNFIEFYFKSS  
 KWYRFMALNGDSGARADRFSIKDRTFMEMPLHIPCMDEQIKIGQFFSKLDRQIELEEQKLELLQQQ  
 KKGYMQKIFSQELRFKDENGNDYPNWRTIELKNIENIVDNRGKTPDNAPSEKYPLLEVNALGYR  
 PAYIKVSKFVSENTYNNWFREHLKENDILFSTVGNTGIVSLMDNYKAVIAQNIVGLRVNNNNLPSF  
 IYYMLS YKGNQKKIKRIQMGAVQPSVKVSQFKFIKYLVPKDEQEKVAKLLIEIDKLVNKQLIKIE  
 LLQQRKKALLKSMFIPGGSHHHHHH

1 2 3 4 5 6 7 8 9 10 11 12 13 14 15

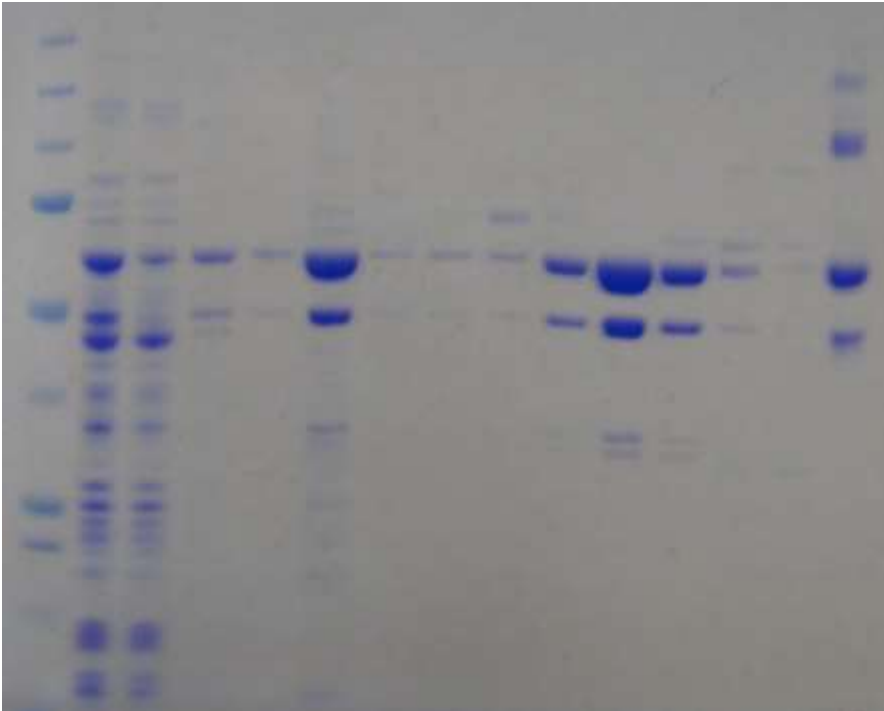

1- marker 2- soluble cell extract 3- Nickel column flow through 4- Nickel column wash 1  
 5- Nickel column wash 2 6- Nickel column eluate 7-14 Fractions from gel filtration column  
 15- CC398-1 purified protein marker

Nuclease assay gave a clear result.

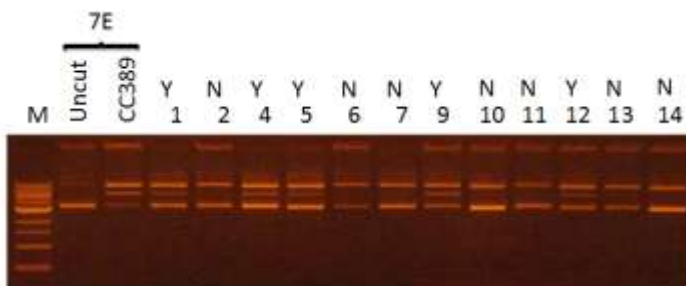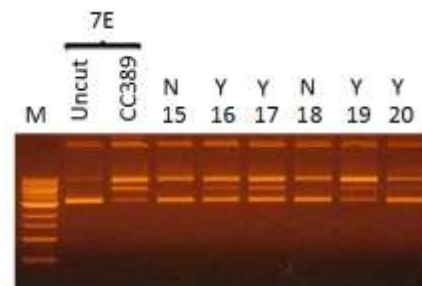



**S. SauNP** ACC-5-CCT

MSNTQKKNVPELRFPGFEGEWEEKKLGEFAGKVTQKNVDKKYIETLTNSAELGIISQKDYFDKEIS  
NIDNIKKYYVVEENDFVYNPRMSNYAPFGPVNRNKLGKKGVMSPLYTVFKIQNIDLNFIEFYFKSS  
KWYRFMALNGDSGARADRFSIKDRTFMEMPLHIPCMDEQIKIGQFFSKLDRQIELEEQLLELFQQQ  
KKGVMQKIFSQELRFKDESGNDYPDWEEKELGEVADR VIRKNKNFESKKPLTISGQLGLIDQTEYF  
SKSVSSKNLENYTLIKNGEFAYNKSY SNGYPLGAIKRLTRYDSGVLSSLYICFSIKSEMSKDFMEA  
YFDSTHWYREVSGIAVEGARNHGLLNISVNDFF TILIKYPSLEEQRKIGDFFIKLDRQIELEEQL  
ELLQQRKKALLKSMLIPGGSHHHHHH

1 2 3 4 5 6 7 8

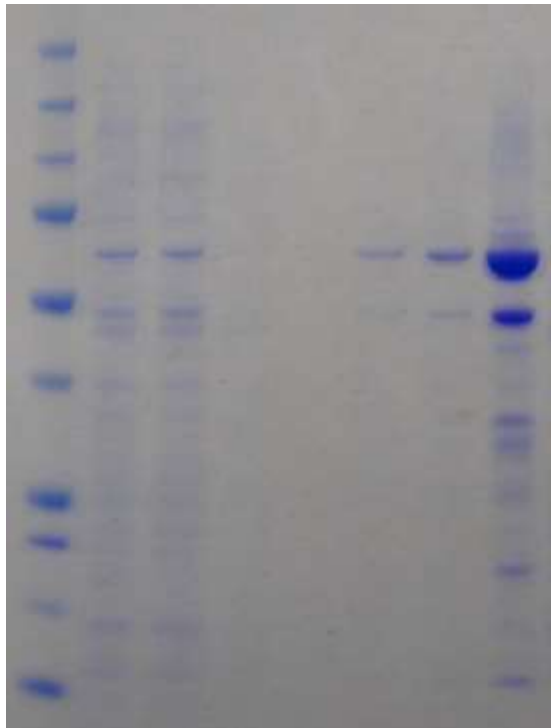

1- marker, 2- soluble cell extract, 3- Nickel column flow through, 4- Nickel column wash 1, 5- Nickel column wash 2, 6- Nickel column eluate, 7- eluate after conc. and PD10 desalting, 8- Final concentrated protein

Although purified this MTase was only assayed via SMRT.

S. SauNP ACC-5-CCT

Motifs

| Motif         | Modified Position | Modification Type | % Motifs Detected | # Of Motifs Detected | # Of Motifs In Genome | Mean Modification QV | Mean Motif Coverage | Partner Motif |
|---------------|-------------------|-------------------|-------------------|----------------------|-----------------------|----------------------|---------------------|---------------|
| ACCNNNNNCCT   | 1                 | m6A               | 91.03             | 1320                 | 1450                  | 49.8                 | 29.6                | AGGNNNNNGGT   |
| AGGNNNNNGGT   | 1                 | m6A               | 89.79             | 1302                 | 1450                  | 50.0                 | 29.7                | ACCNNNNNCCT   |
| HCCACNNNNNCCM | 4                 | m6A               | 17.39             | 52                   | 299                   | 40.0                 | 34.2                |               |
| Not Clustered | 0                 |                   | 0.01              | 737                  | 9114127               | 34.7                 | 34.2                |               |

Modification QV Histogram By Motif

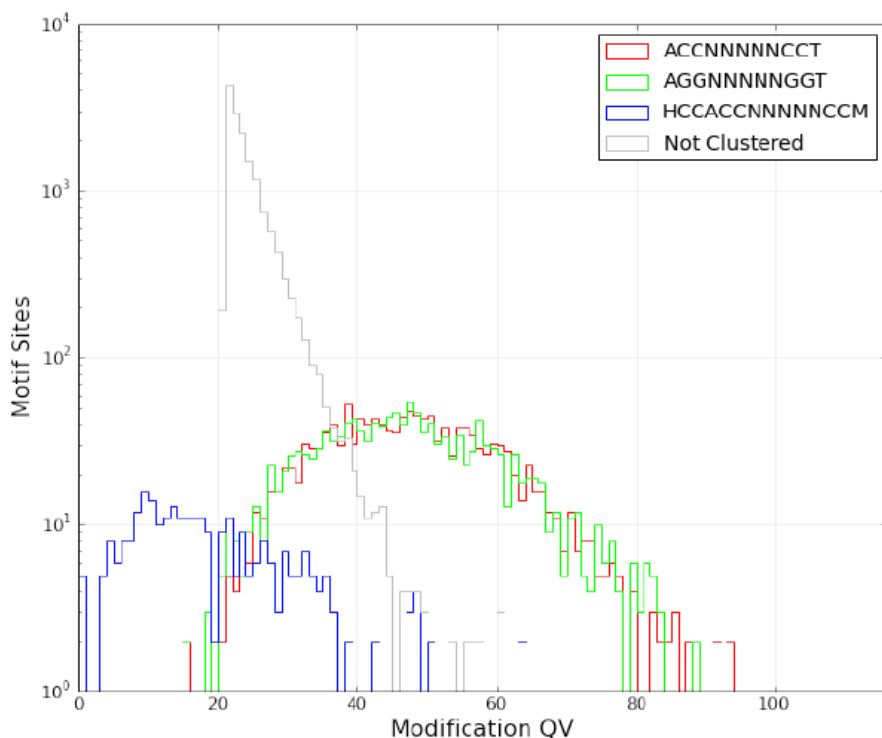

Kinetic Detections

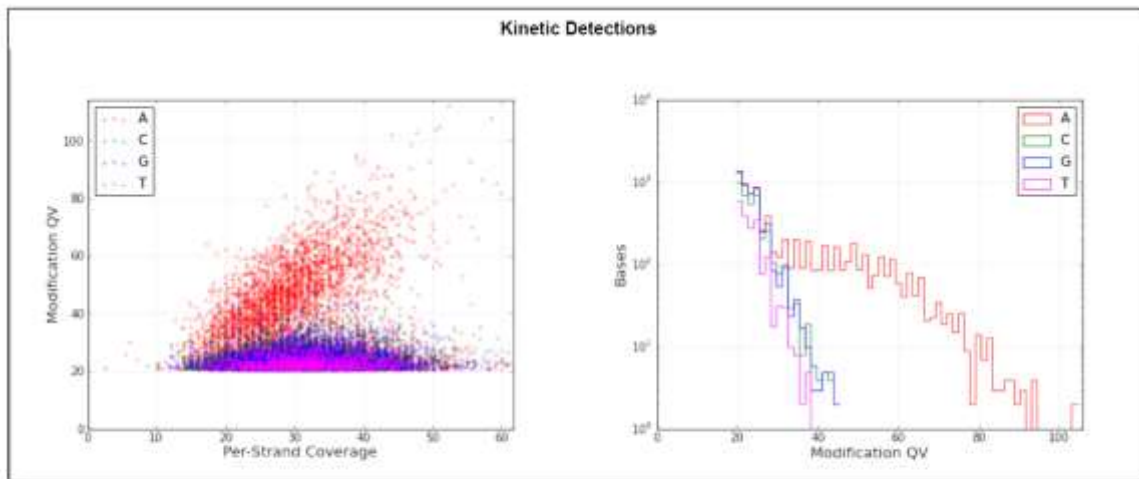

Motifs

| Motif         | Modified Position | Modification Type | % Motifs Detected | # Of Motifs Detected | # Of Motifs In Genome | Mean Modification QV | Mean Motif Coverage | Partner Motif |
|---------------|-------------------|-------------------|-------------------|----------------------|-----------------------|----------------------|---------------------|---------------|
| ACCNNNNNCCT   | 1                 | m6A               | 91.03             | 1320                 | 1450                  | 49.8                 | 29.6                | AGGNNNNNGGT   |
| AGGNNNNNGGT   | 1                 | m6A               | 89.79             | 1302                 | 1450                  | 50.0                 | 29.7                | ACCNNNNNCCT   |
| HCCACNNNNNCCM | 4                 | m6A               | 17.39             | 52                   | 299                   | 40.0                 | 34.2                |               |
| Not Clustered | 0                 |                   | 0.01              | 737                  | 9114127               | 34.7                 | 34.2                |               |

**S. SauNQ ACC-5-RTGT**

MSNTQKKNVPELRFPGFEGEWEEKKLGEFAGKVTQKNVDKKYIETLTNSAELGIISQKDYFDKEIS  
 NIDNIKKYYVVEENDFVYNPRMSNYAPFGPVNRNKLKGGVMSPLYTVFKIQNIDLNFIEFYFKSS  
 KWYRFMALNGDSGARADRFSIKDRTFMEMPLHIPCMDEQIKIGQFFSKLDRQIELEEQLLELLQQQ  
 KKGYMQKIFSQELRFKDENGEDYSEWEERRFADIFKFHNKLRKPIKENLRVKGSYPYGGATGIIDY  
 VDDFI FDGN YLLIGEDGANI ITRSAPLVYLVNGKFWVNNHAHILSPLNGNIQYLYQVAELVNYEKY  
 NTGTAQPKLNIQNLKIINVVISTNLEEQQKIGSFLSKLDRQIDLEEQLLELLQQRKKALLKSMFVP  
 GGSHHHHHH

1 2 3 4 5 6 7

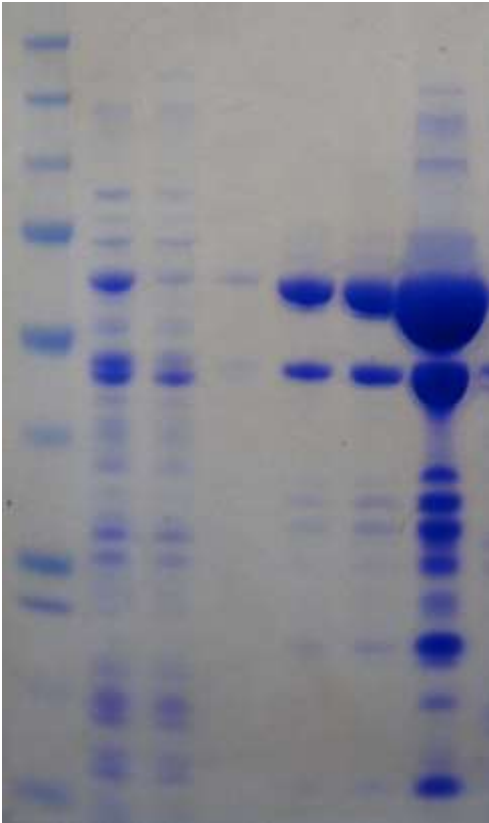

1- marker 2- soluble cell extract 3- Nickel column flow through  
 4- Nickel column wash 5- Nickel column eluate 6- eluate after conc. and PD10 desalting  
 7- Final concentrated protein  
 DNA cleavage assay and SMRT assay agreed.

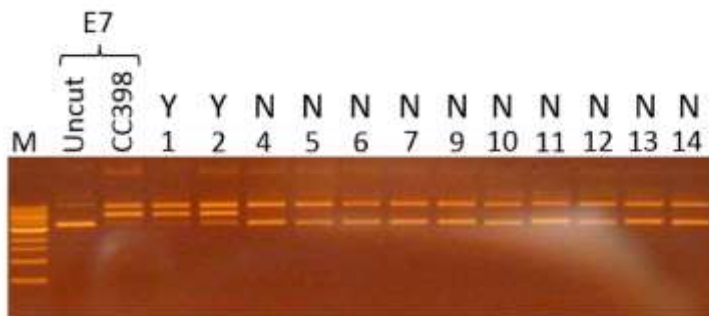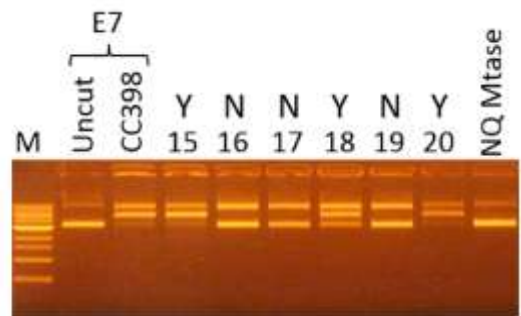

S. SauNQ ACC-5-RTGT

Motifs

| Motif           | Modified Position | Modification Type | % Motifs Detected | # Of Motifs Detected | # Of Motifs In Genome | Mean Modification QV | Mean Motif Coverage | Partner Motif |
|-----------------|-------------------|-------------------|-------------------|----------------------|-----------------------|----------------------|---------------------|---------------|
| ACAYNNNNNGGT    | 3                 | m6A               | 99.85             | 654                  | 655                   | 83.5                 | 56.3                | ACCNNNNRTGT   |
| ACCNNNNRTGT     | 1                 | m6A               | 99.85             | 654                  | 655                   | 80.7                 | 55.5                | ACAYNNNNNGGT  |
| ACCNNNNRAGTH    | 1                 | m6A               | 55.56             | 215                  | 387                   | 54.3                 | 56.5                |               |
| BNACNNNNNRGGTH  | 3                 | m6A               | 23.74             | 118                  | 497                   | 45.8                 | 57.6                |               |
| DACAGNNNNNGGTNR | 4                 | m6A               | 21.65             | 50                   | 231                   | 42.8                 | 55.5                |               |
| HACNNNNNDAGTG   | 2                 | m6A               | 21.03             | 41                   | 195                   | 44.8                 | 57.9                |               |
| YNACCVNNNNCTGT  | 3                 | m6A               | 20.52             | 47                   | 229                   | 42.9                 | 57.7                |               |
| Not Clustered   | 0                 |                   | 0.03              | 3095                 | 9114477               | 35.3                 | 62.5                |               |

Modification QV Histogram By Motif

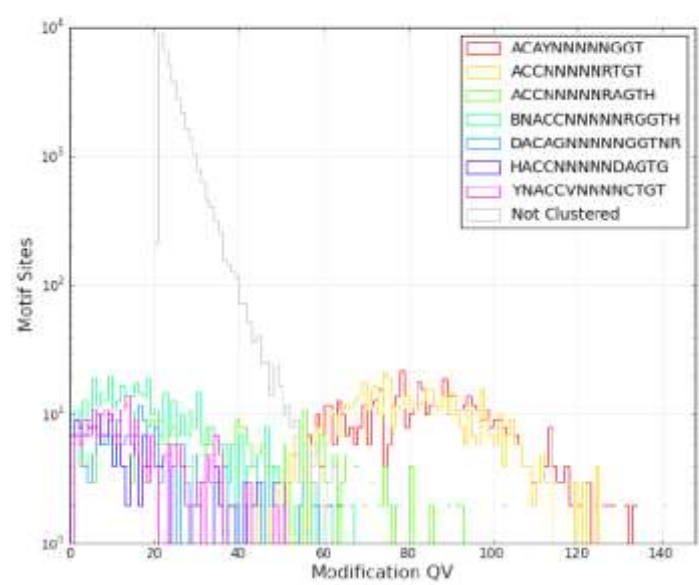

Kinetic Detections

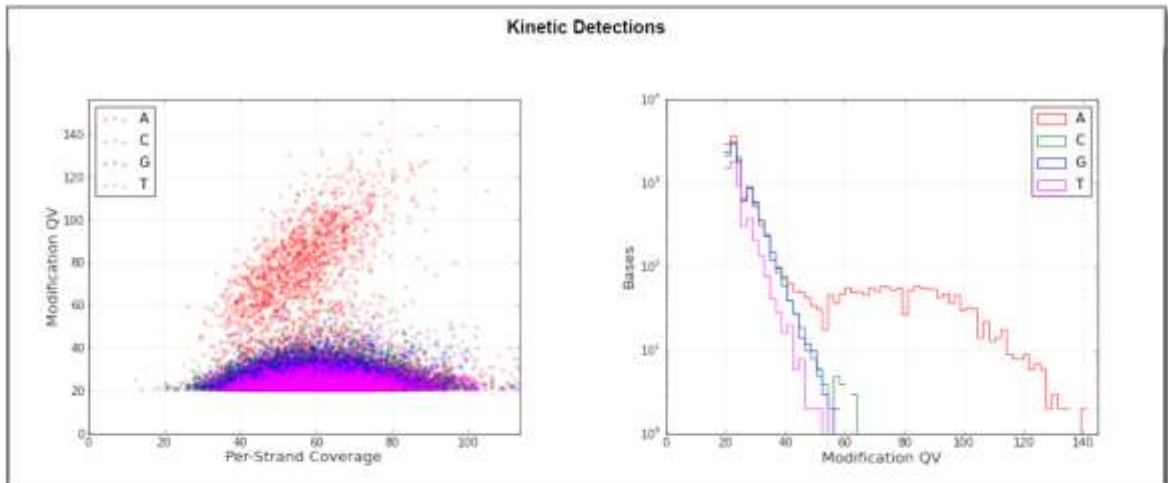

Motifs

| Motif           | Modified Position | Modification Type | % Motifs Detected | # Of Motifs Detected | # Of Motifs In Genome | Mean Modification QV | Mean Motif Coverage | Partner Motif |
|-----------------|-------------------|-------------------|-------------------|----------------------|-----------------------|----------------------|---------------------|---------------|
| ACAYNNNNNGGT    | 3                 | m6A               | 99.85             | 654                  | 655                   | 83.5                 | 56.3                | ACCNNNNRTGT   |
| ACCNNNNRTGT     | 1                 | m6A               | 99.85             | 654                  | 655                   | 80.7                 | 55.5                | ACAYNNNNNGGT  |
| ACCNNNNRAGTH    | 1                 | m6A               | 55.56             | 215                  | 387                   | 54.3                 | 56.5                |               |
| BNACNNNNNRGGTH  | 3                 | m6A               | 23.74             | 118                  | 497                   | 45.8                 | 57.6                |               |
| DACAGNNNNNGGTNR | 4                 | m6A               | 21.65             | 50                   | 231                   | 42.8                 | 55.5                |               |
| HACNNNNNDAGTG   | 2                 | m6A               | 21.03             | 41                   | 195                   | 44.8                 | 57.9                |               |
| YNACCVNNNNCTGT  | 3                 | m6A               | 20.52             | 47                   | 229                   | 42.9                 | 57.7                |               |
| Not Clustered   | 0                 |                   | 0.03              | 3095                 | 9114477               | 35.3                 | 62.5                |               |

**S. SauNS**    ACC-6-TGC

MSNTQKKNVPELRFPGFEGEWEEKKLGEFAGKVTQKNVDKKYIETLTNSAELGIISQKDYFDKEIS  
 NIDNIKKYYVVEENDFVYNPRMSNYAPFGPVNRNKLGGKGVMSPLYTVFKIQNIDLNFIEFYFKSS  
 KWYRFMALNGDSGARADRFSIKDRTFMEMPLHIPCMDEQIKIGQFFSKLDRQIELEEQKLELLQQQ  
 KKGYMQKIFSQELRFKDENGNDYPDWTNERLGEVTTVTMGQSPKSVNYTDNSNDTVLIQGNADIEN  
 GLINPRIYTRVTKLIQKDEIILTVRAPVGKLAQAQINACIGRGVCSIKGDKFLYYFLEWFATQNK  
 WIRFSQGSTFESISGNDIRNIHIKIPVEDERTKI IKLLNSLDVLSKTDLKIQLKQRKQSLLOKI  
 FVPPGGSHHHHHH

1    2    3    4    5    6    7

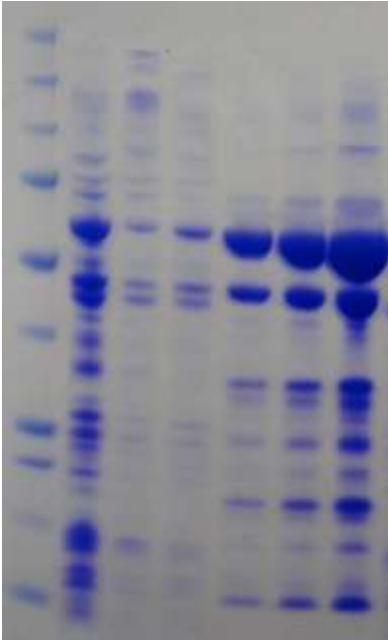

- 1- marker    2- soluble cell extract
- 3- Nickel column flow through    4- Nickel column wash
- 5- Nickel column eluate    6- eluate after conc. and PD10 desalting
- 7- final protein after concentration

Although purified this MTase was only assayed via SMRT.

**Motifs**

| Motif           | Modified Position | Modification Type | % Motifs Detected | # Of Motifs Detected | # Of Motifs In Genome | Mean Modification QV | Mean Motif Coverage | Partner Motif |
|-----------------|-------------------|-------------------|-------------------|----------------------|-----------------------|----------------------|---------------------|---------------|
| ACCNNNNNTGC     | 1                 | m6A               | 100.00            | 2938                 | 2938                  | 118.8                | 81.7                | GCANNNNNGGT   |
| GCANNNNNGGT     | 3                 | m6A               | 99.90             | 2935                 | 2938                  | 120.7                | 83.9                | ACCNNNNNTGC   |
| ACCNNNHHTMCD    | 1                 | m6A               | 57.03             | 925                  | 1622                  | 71.1                 | 83.7                | HGKADDNNNGGT  |
| HGKADDNNNGGT    | 4                 | m6A               | 48.83             | 792                  | 1622                  | 68.8                 | 86.4                | ACCNNNHHTMCD  |
| YNACCNNNHVGC    | 3                 | m6A               | 46.49             | 1925                 | 4141                  | 57.7                 | 84.6                |               |
| CCACCNNNNNTGG   | 3                 | m6A               | 39.15             | 74                   | 189                   | 55.7                 | 85.9                |               |
| TNCCANDNNNGGTNR | 5                 | m6A               | 31.60             | 73                   | 231                   | 53.5                 | 82.5                |               |
| YNACCNNNGHMGC   | 3                 | m6A               | 31.35             | 195                  | 622                   | 53.2                 | 87.4                |               |
| YRNACCNNNHVGC   | 4                 | m6A               | 28.65             | 465                  | 1623                  | 48.9                 | 86.3                |               |
| ACCNNNHHTMCC    | 1                 | m6A               | 27.58             | 131                  | 475                   | 58.1                 | 84.3                |               |
| Not Clustered   | 0                 |                   | 0.09              | 8284                 | 9100925               | 38.6                 | 92.5                |               |

Modification QV Histogram By Motif

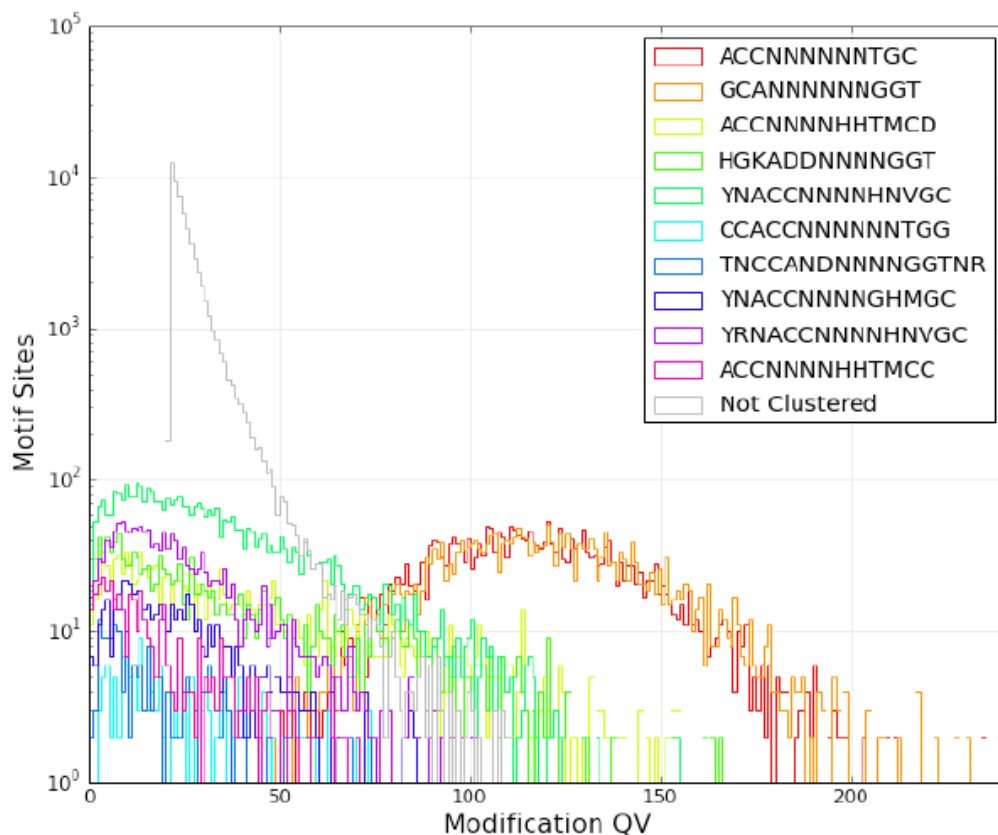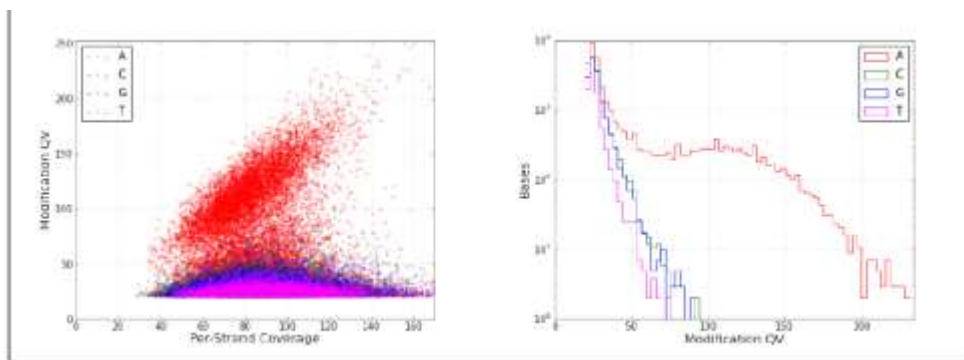

Motifs

| Motif            | Modified Position | Modification Type | % Motifs Detected | # Of Motifs Detected | # Of Motifs in Genome | Mean Modification QV | Mean Motif Coverage | Partner Motif |
|------------------|-------------------|-------------------|-------------------|----------------------|-----------------------|----------------------|---------------------|---------------|
| ACCNNNNNTGC      | 1                 | m5A               | 100.00            | 2930                 | 2930                  | 118.8                | 81.7                | GCANNNNNGGT   |
| GCANNNNNGGT      | 3                 | m5A               | 99.90             | 2935                 | 2938                  | 120.7                | 83.9                | ACCNNNNNTGC   |
| ACCNNNNHHTMCD    | 1                 | m5A               | 57.03             | 925                  | 1622                  | 71.1                 | 83.7                | HGKADDNNNNGGT |
| HGKADDNNNNGGT    | 4                 | m5A               | 48.83             | 792                  | 1622                  | 68.8                 | 86.4                | ACCNNNNHHTMCD |
| YNACCNNNNHNVGC   | 3                 | m5A               | 40.48             | 1928                 | 4141                  | 57.7                 | 84.6                |               |
| CCACCNNNNNTGG    | 3                 | m5A               | 39.15             | 74                   | 189                   | 65.7                 | 85.9                |               |
| TNCCANDNNNNGGTNR | 5                 | m5A               | 31.60             | 73                   | 231                   | 53.5                 | 82.5                |               |
| YNACCNNNNGHMGC   | 3                 | m5A               | 31.35             | 195                  | 622                   | 53.2                 | 87.4                |               |
| YRNACCNNNNHNVGC  | 4                 | m5A               | 28.55             | 465                  | 1623                  | 48.9                 | 86.3                |               |
| ACCNNNNHHTMCC    | 1                 | m5A               | 27.55             | 131                  | 475                   | 58.1                 | 84.3                |               |
| Not Clustered    | 0                 |                   | 0.09              | 8204                 | 8100925               | 38.6                 | 92.5                |               |

**S. SauNU** ACC-5-RTC

MSNTQKKNVPELRFPGFEGEWEEKLGEFAGKVTQKNVDKKYIETLTNSAELGIISQKDYFDKEIS  
 NIDNIKKYYVVEENDFVYNPRMSNYAPFGPVNRNKLKGGKGVMSPLYTVFKIQNIDLNFIEFYFKSS  
 KWYRFMALNGDSGARADRFSIKDRTFMEMPLHIPCMDEQIKIGQFFSKLDRQIELEEQKLELLQQQ  
 KKGYMQKIFSQELRFKDENGEDYPDWEVTTIQNITKYTSSKKSSNQYADKDNSKGYPVYDAVQEIG  
 KDSNYDIEESYISILKDGAGVGRNLNLRPGKSSVIGTMGYIQSNNVDIEFLYYRMKVVDFKKYIIGS  
 TIPHLYFKDYSKETLYIPSSIQEQAKIGMFI SNLDKLIENKNLKNLCLKQLKQGLLQSMFIPGGSH  
 HHHHH

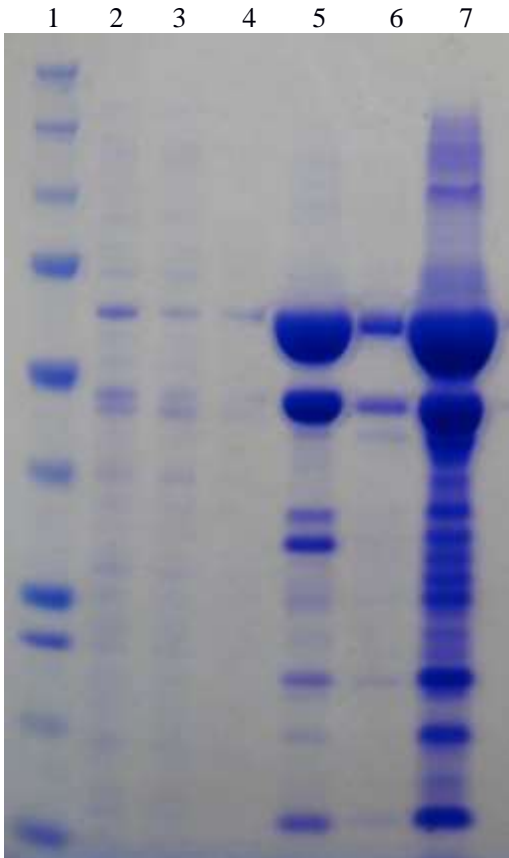

- 1- marker
- 2- soluble cell extract
- 3- Nickel column flow through
- 4- Nickel column wash
- 5- Nickel column eluate
- 6- eluate after PD10 desalting
- 7- final protein after concentration

DNA cleavage assay worked despite there being one site in pUC19 but this site was subject to dam methylation and therefore not cut.

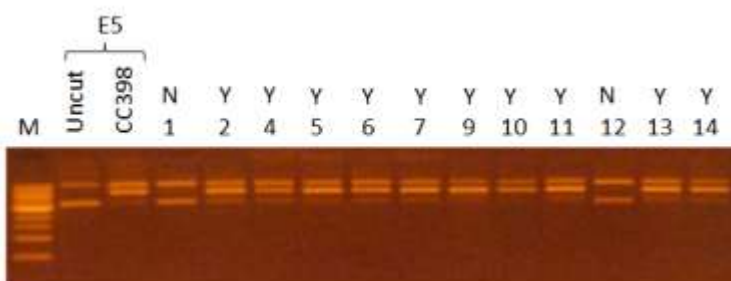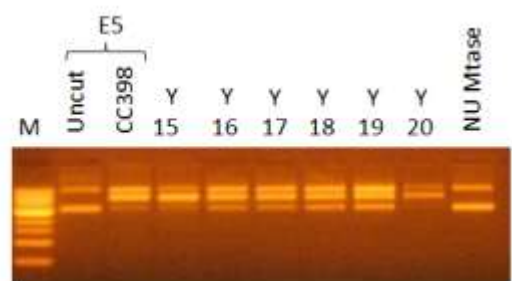

Modification QV Histogram By Motif

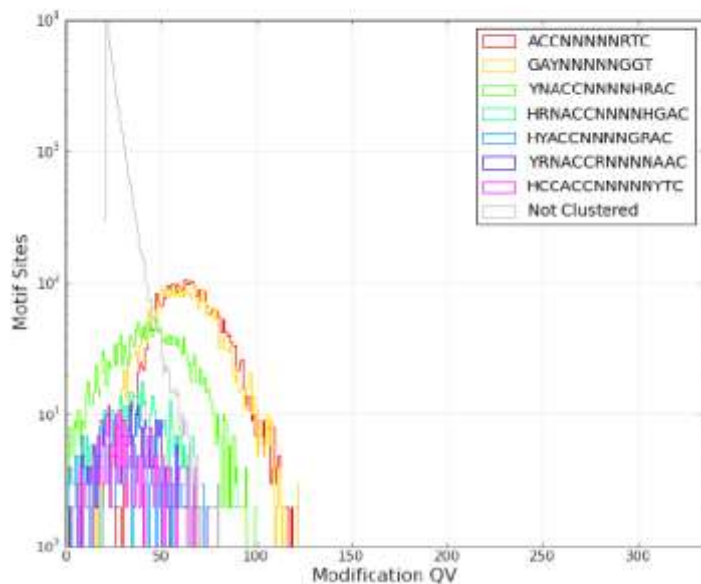

Motifs

| Motif         | Modified Position | Modification Type | % Motifs Detected | # Of Motifs Detected | # Of Motifs In Genome | Mean Modification QV | Mean Motif Coverage | Partner Motif |
|---------------|-------------------|-------------------|-------------------|----------------------|-----------------------|----------------------|---------------------|---------------|
| ACCNNNNRTC    | 1                 | m6A               | 81.87             | 3162                 | 3862                  | 70.1                 | 41.5                | GAYNNNNGGT    |
| GAYNNNNGGT    | 2                 | m6A               | 75.14             | 2902                 | 3862                  | 70.8                 | 41.9                | ACCNNNNRTC    |
| YNACCNNNHRAC  | 3                 | m6A               | 37.48             | 820                  | 2188                  | 64.9                 | 43.3                |               |
| HRNACCNNNHGAC | 4                 | m6A               | 26.22             | 140                  | 534                   | 63.7                 | 43.0                |               |
| HYACCNNNNGRAC | 3                 | m6A               | 19.23             | 50                   | 260                   | 63.3                 | 44.4                |               |
| YRNACCRNNNAAC | 4                 | m6A               | 17.15             | 59                   | 344                   | 63.7                 | 45.8                |               |
| HCCACCNNNNYTC | 4                 | m6A               | 16.81             | 39                   | 232                   | 61.9                 | 45.9                |               |
| Not Clustered | 0                 |                   | 0.00              | 229                  | 9106044               | 58.3                 | 48.5                |               |

Kinetic Detections

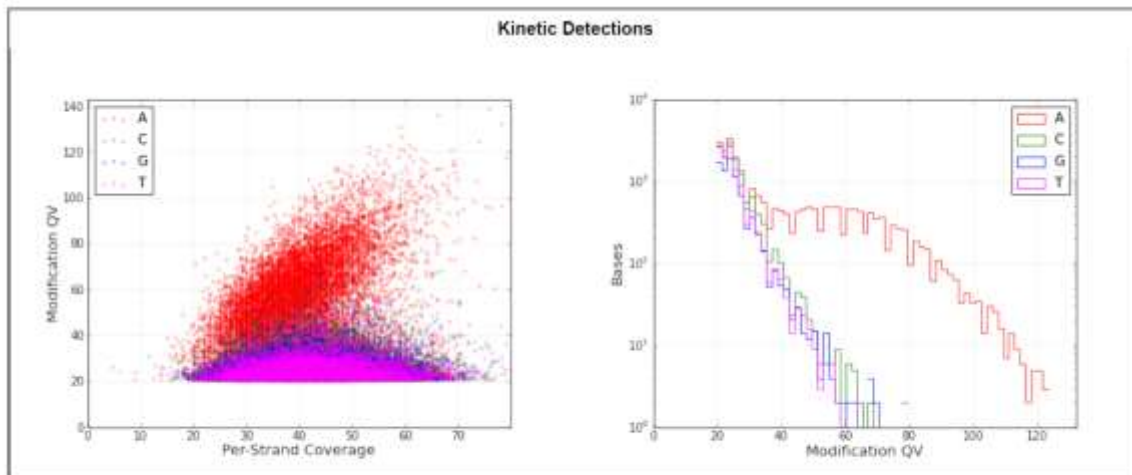

Motifs

| Motif         | Modified Position | Modification Type | % Motifs Detected | # Of Motifs Detected | # Of Motifs In Genome | Mean Modification QV | Mean Motif Coverage | Partner Motif |
|---------------|-------------------|-------------------|-------------------|----------------------|-----------------------|----------------------|---------------------|---------------|
| ACCNNNNRTC    | 1                 | m6A               | 81.87             | 3162                 | 3862                  | 70.1                 | 41.5                | GAYNNNNGGT    |
| GAYNNNNGGT    | 2                 | m6A               | 75.14             | 2902                 | 3862                  | 70.8                 | 41.9                | ACCNNNNRTC    |
| YNACCNNNHRAC  | 3                 | m6A               | 37.48             | 820                  | 2188                  | 64.9                 | 43.3                |               |
| HRNACCNNNHGAC | 4                 | m6A               | 26.22             | 140                  | 534                   | 63.7                 | 43.0                |               |
| HYACCNNNNGRAC | 3                 | m6A               | 19.23             | 50                   | 260                   | 63.3                 | 44.4                |               |
| YRNACCRNNNAAC | 4                 | m6A               | 17.15             | 59                   | 344                   | 63.7                 | 45.8                |               |
| HCCACCNNNNYTC | 4                 | m6A               | 16.81             | 39                   | 232                   | 61.9                 | 45.9                |               |
| Not Clustered | 0                 |                   | 0.00              | 229                  | 9106044               | 58.3                 | 48.5                |               |



**S. SauNW ACC-6-TTYG**

MSNTQKKNVPELRFPGFEGEWEEKKLGEFAGKVTQKNVDKKYIETLTNSAELGIISQKDYFDKEIS  
 NIDNIKKYYVVEENDFVYNPRMSNYAPFGPVNRNKLGKKGVMSPLYTVFKIQNIDLNFIEFYFKSS  
 KWYRFMALNGDSGARADRFSIKDRTFMEMPLHIPCMDEQIKIGQFFSKLDRQIELEEQKLELLQQQ  
 KKGYMQKIFSQELRFKDENGNDYPDWEEKQLGELSQIVRGASPRPIKDPKWFNKESDIGWLRISDV  
 TNQNGKIYHLEQKLSIEGQEKTRVLVTTHLLLSIAASIGKPV MNFVKTVGVDGFLIFLKPKNLFF  
 MYYWLEYFKDKWSKYGQPGSQVNLNSEIVKSQTLNMP SNHEQEKVGQFFNRNEKLIELQQEKIMYI  
 KRCKQVLLQKMFIPGGSHHHHHH

1 2 3 4 5 6 7

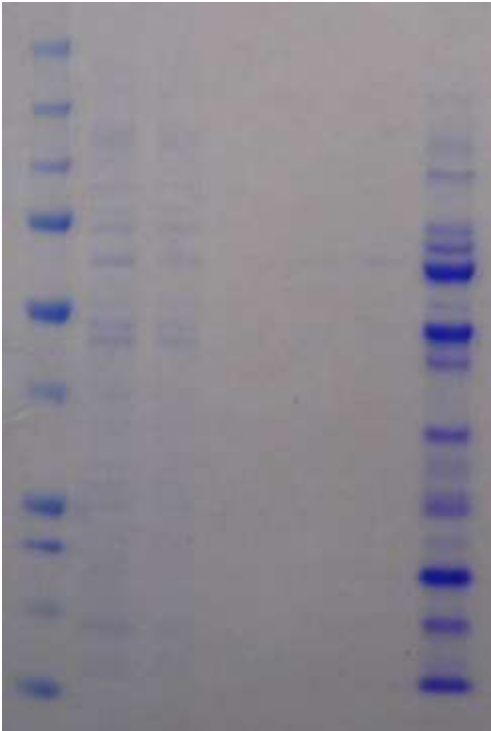

- 1- marker
- 2- soluble cell extract
- 3- Nickel column flow through
- 4- Nickel column wash
- 5- Nickel column eluate
- 6- eluate after PD10 desalting
- 7- final protein after concentration

DNA cleavage assay.

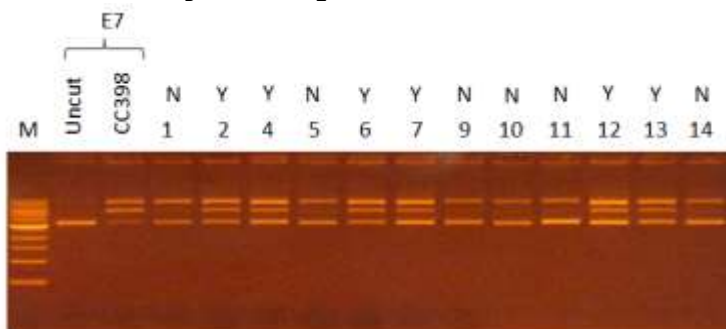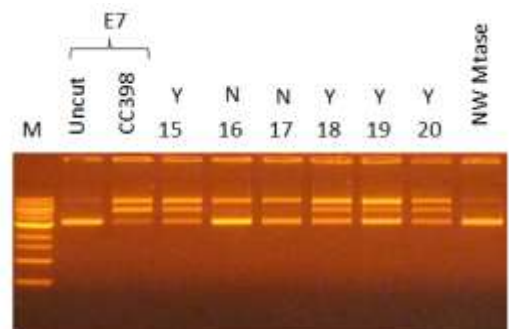

Motifs

| Motif          | Modified Position | Modification Type | % Motifs Detected | # Of Motifs Detected | # Of Motifs In Genome | Mean Modification QV | Mean Motif Coverage | Partner Motif  |
|----------------|-------------------|-------------------|-------------------|----------------------|-----------------------|----------------------|---------------------|----------------|
| ACCNNNNNTTYG   | 1                 | m6A               | 99.86             | 1461                 | 1463                  | 80.7                 | 49.6                | CRAANNNNNGGT   |
| CRAANNNNNGGT   | 4                 | m6A               | 99.59             | 1457                 | 1463                  | 74.7                 | 48.6                | ACCNNNNNTTYG   |
| YNACCNNNNNTSCG | 3                 | m6A               | 39.52             | 313                  | 792                   | 52.0                 | 52.7                | CGSANNNNNGGTNR |
| CGSANNNNNGGTNR | 4                 | m6A               | 35.23             | 279                  | 792                   | 50.1                 | 52.3                | YNACCNNNNNTSCG |
| ACCNNNNBRTYG   | 1                 | m6A               | 28.16             | 680                  | 2415                  | 49.3                 | 51.3                |                |
| Not Clustered  | 0                 |                   | 0.08              | 6917                 | 9110401               | 37.6                 | 55.8                |                |

Modification QV Histogram By Motif

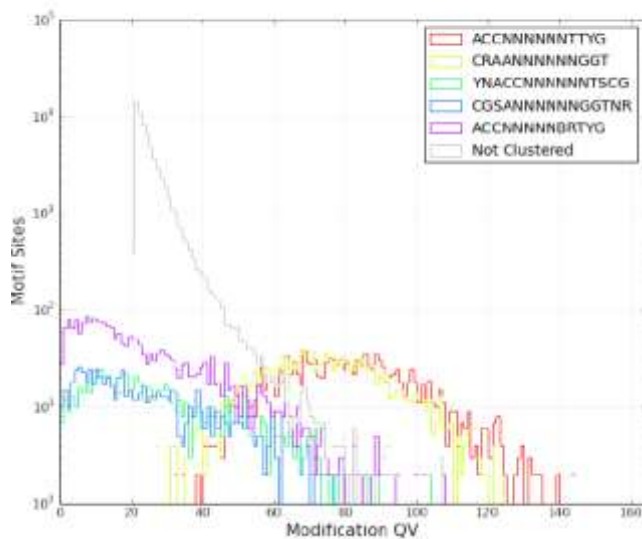

Kinetic Detections

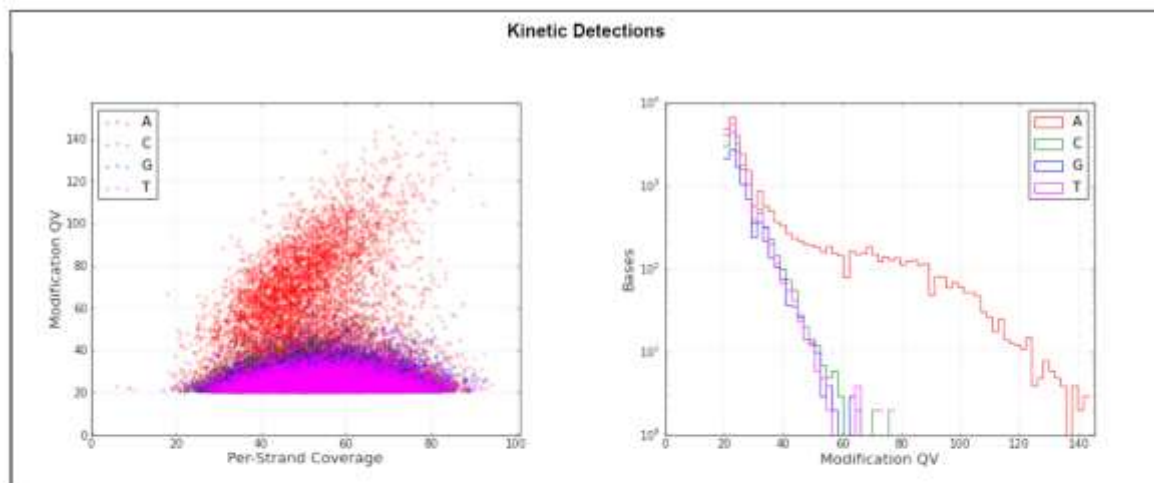

Motifs

| Motif          | Modified Position | Modification Type | % Motifs Detected | # Of Motifs Detected | # Of Motifs In Genome | Mean Modification QV | Mean Motif Coverage | Partner Motif  |
|----------------|-------------------|-------------------|-------------------|----------------------|-----------------------|----------------------|---------------------|----------------|
| ACCNNNNNTTYG   | 1                 | m6A               | 99.86             | 1461                 | 1463                  | 80.7                 | 49.6                | CRAANNNNNGGT   |
| CRAANNNNNGGT   | 4                 | m6A               | 99.59             | 1457                 | 1463                  | 74.7                 | 48.6                | ACCNNNNNTTYG   |
| YNACCNNNNNTSCG | 3                 | m6A               | 39.52             | 313                  | 792                   | 52.0                 | 52.7                | CGSANNNNNGGTNR |
| CGSANNNNNGGTNR | 4                 | m6A               | 35.23             | 279                  | 792                   | 50.1                 | 52.3                | YNACCNNNNNTSCG |
| ACCNNNNBRTYG   | 1                 | m6A               | 28.16             | 680                  | 2415                  | 49.3                 | 51.3                |                |
| Not Clustered  | 0                 |                   | 0.08              | 6917                 | 9110401               | 37.6                 | 55.8                |                |

**S. SauNY ACC-6-TAG**

MSNTQKKNVPELRFPGFEGEWEEKLGEFAGKVTQKNVDKKYIETLTNSAELGIISQKDYFDKEIS  
 NIDNIKKYYVVEENDFVYNPRMSNYAPFGPVNRNKLGKKGVMSPLYTVFKIQNIDLNFIEFYFKSS  
 KWYRFMALNGD SGARADRF SIKDRTFMEMPLHIPCMDEQIKIGQFFSKLDRQIELEEQKLELLQOQ  
 KKGYMQKIFSQELRFKDENGNDYPDWEKKLKEIACVYTGNTPSKKENIYWNKGEYVWVTPTDINN  
 SKNIYESENKLTQEGYKKARQLPENTLLVTCIASIGKNAILRKQGSCNQQINAVVPFENINIDYLY  
 YISDSLSTFMKSIAGKTATQIVNKNTFENLEIYLAPFEEQNKIADLISSLEELIEKQASKLIKMS  
 RKQGMLQIMFIPGGSHHHHHH

1 2 3 4 5 6

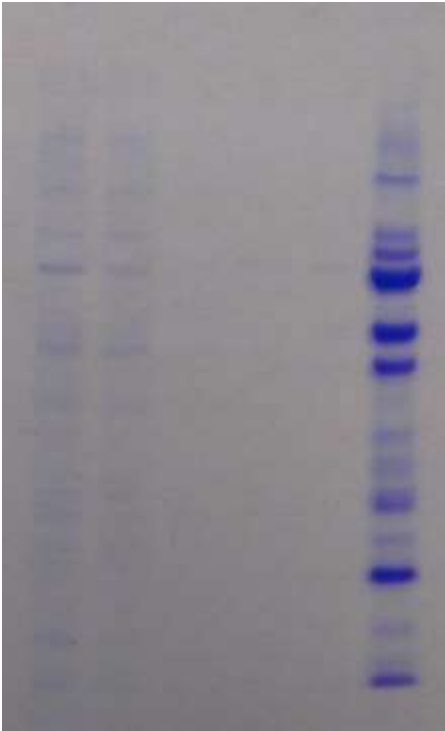

- 1- soluble cell extract
- 2- Nickel column flow through
- 3- Nickel column wash 1
- 4- Nickel column wash 2
- 5- Nickel column eluate
- 6- final protein after PD10 desalting and concentration of eluate

DNA cleavage assay.

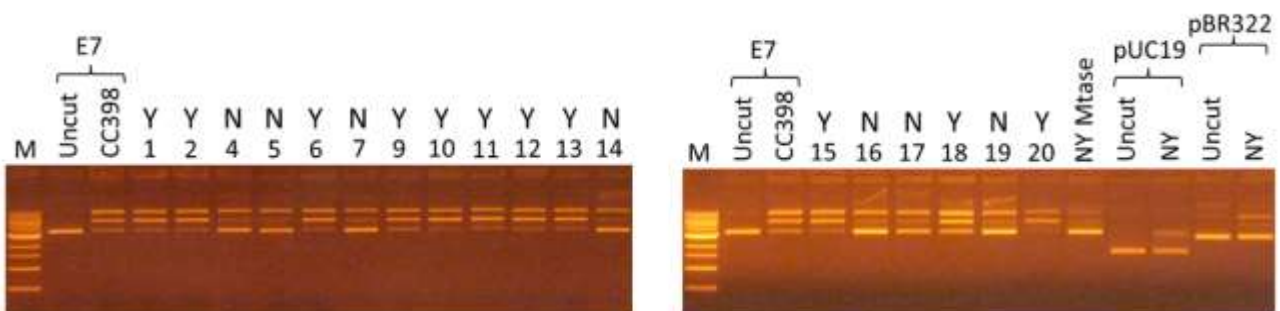

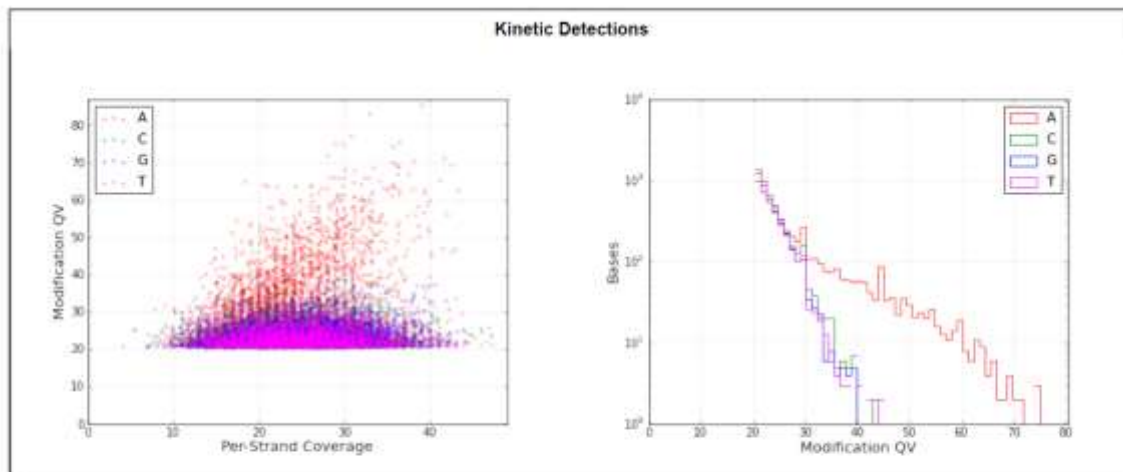

**Motifs**

| Motif           | Modified Position | Modification Type | % Motifs Detected | # Of Motifs Detected | # Of Motifs In Genome | Mean Modification QV | Mean Motif Coverage | Partner Motif |
|-----------------|-------------------|-------------------|-------------------|----------------------|-----------------------|----------------------|---------------------|---------------|
| ACCNNNNNTAG     | 1                 | m6A               | 75.92             | 539                  | 710                   | 43.3                 | 24.7                | CTANNNNNGGT   |
| CTANNNNNGGT     | 3                 | m6A               | 72.39             | 514                  | 710                   | 42.9                 | 24.7                | ACCNNNNNTAG   |
| BNACCNNNNNTAAG  | 3                 | m6A               | 34.00             | 68                   | 200                   | 39.3                 | 25.0                |               |
| CCACCNNNNNMAGND | 3                 | m6A               | 23.68             | 85                   | 359                   | 38.3                 | 26.1                |               |
| Not Clustered   | 0                 |                   | 0.01              | 622                  | 9115347               | 34.4                 | 27.6                |               |

**Motifs**

| Motif           | Modified Position | Modification Type | % Motifs Detected | # Of Motifs Detected | # Of Motifs In Genome | Mean Modification QV | Mean Motif Coverage | Partner Motif |
|-----------------|-------------------|-------------------|-------------------|----------------------|-----------------------|----------------------|---------------------|---------------|
| ACCNNNNNTAG     | 1                 | m6A               | 75.92             | 539                  | 710                   | 43.3                 | 24.7                | CTANNNNNGGT   |
| CTANNNNNGGT     | 3                 | m6A               | 72.39             | 514                  | 710                   | 42.9                 | 24.7                | ACCNNNNNTAG   |
| BNACCNNNNNTAAG  | 3                 | m6A               | 34.00             | 68                   | 200                   | 39.3                 | 25.0                |               |
| CCACCNNNNNMAGND | 3                 | m6A               | 23.68             | 85                   | 359                   | 38.3                 | 26.1                |               |
| Not Clustered   | 0                 |                   | 0.01              | 622                  | 9115347               | 34.4                 | 27.6                |               |

**Modification QV Histogram By Motif**

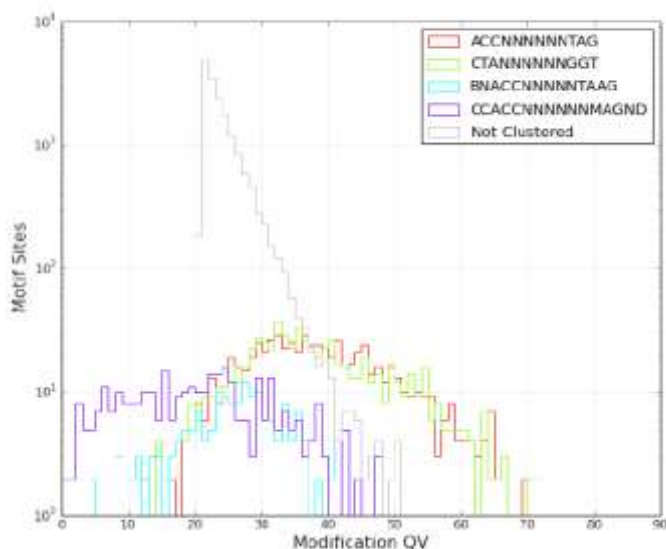

S. SauNa\* ACC-6-TTC

| Motifs        |                   |                   |                   |                      |                       |                      |                     |               |
|---------------|-------------------|-------------------|-------------------|----------------------|-----------------------|----------------------|---------------------|---------------|
| Motif         | Modified Position | Modification Type | % Motifs Detected | # Of Motifs Detected | # Of Motifs In Genome | Mean Modification QV | Mean Motif Coverage | Partner Motif |
| ACCNNNNNTTC   | 1                 | m6A               | 85.91             | 2567                 | 2988                  | 46.4                 | 26.2                | GAANNNNNGGT   |
| GAANNNNNGGT   | 3                 | m6A               | 78.11             | 2334                 | 2988                  | 44.7                 | 26.2                | ACCNNNNNTTC   |
| RGAANNNNNGGVD | 4                 | m6A               | 16.09             | 107                  | 665                   | 37.1                 | 27.8                |               |
| Not Clustered | 0                 |                   | 0.01              | 1034                 | 9110685               | 35.6                 | 31.8                |               |

MSNTQKKNVPELRFPGFEGEWEEKKLGEFAGKVTQKNVDKKYIETLTNSAELGII SQKDYFDKEIS  
 NIDNIKKYYVVEENDFVYNPRMSNYAPFGPVNRNKLGGKGVMSPLYTVFKIQNIDLNFIEFYFKSS  
 KWYRFMALNGDSGARADRFSIKDRTFMEMPLHIPCMDEQIKIGQFFSKLDRQIELEEQKLELLQQQ  
 KKGVMQKIFSQELRFKDENGNDYPEWENKRIEDIANVNBKGFPTSTNNNEYWDNNDKNWLSIAGMNQ  
 KYLYKGNKGISKDAAKNYMKVKNDTLIMSFKLTIGKLAIVKAPLYTNEAICHFIWKVNKINTEFIY  
 YYLNSLNISTFGVQAVKGVTLNNDINSIIVKLPNEEEQNI IAKFLLEVDKTVNNQLVKTLLKQR  
 KKGLLQRMFVPGGSHHHHHH

Modification QV Histogram By Motif

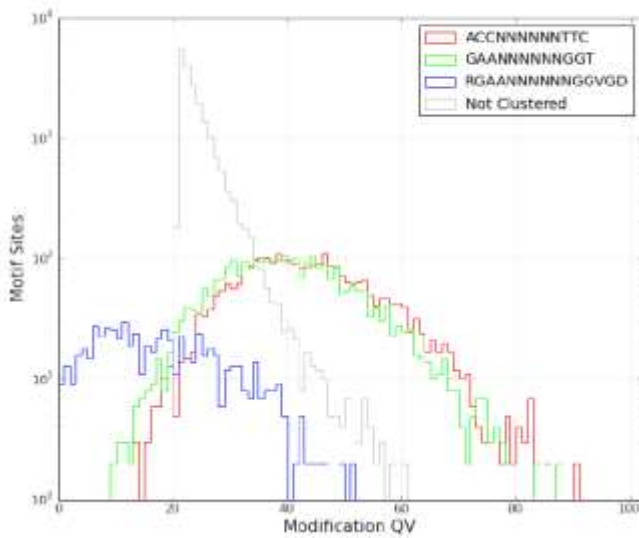

Kinetic Detections

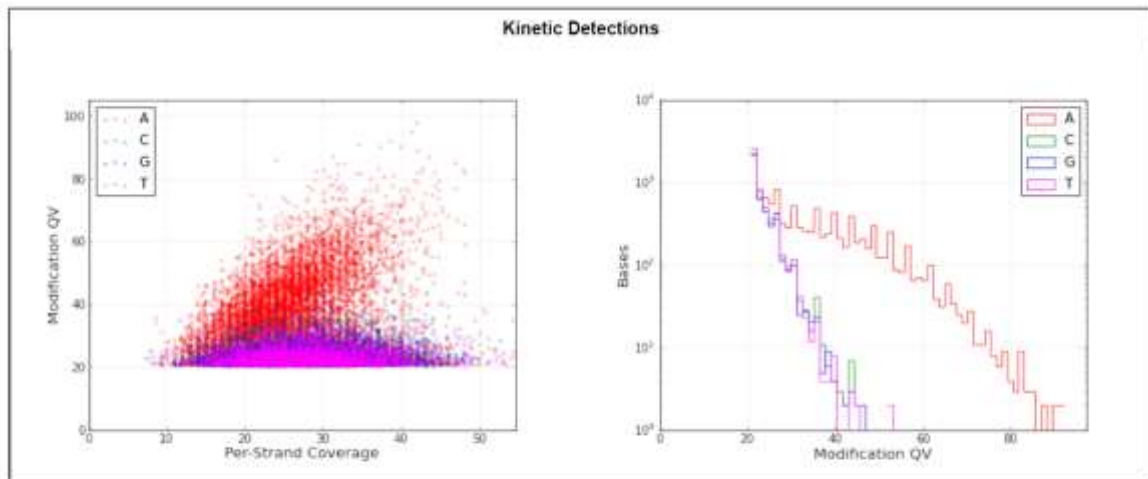

Motifs

| Motif         | Modified Position | Modification Type | % Motifs Detected | # Of Motifs Detected | # Of Motifs In Genome | Mean Modification QV | Mean Motif Coverage | Partner Motif |
|---------------|-------------------|-------------------|-------------------|----------------------|-----------------------|----------------------|---------------------|---------------|
| ACCNNNNNTTC   | 1                 | m6A               | 85.91             | 2567                 | 2988                  | 46.4                 | 26.2                | GAANNNNNGGT   |
| GAANNNNNGGT   | 3                 | m6A               | 78.11             | 2334                 | 2988                  | 44.7                 | 26.2                | ACCNNNNNTTC   |
| RGAANNNNNGGVD | 4                 | m6A               | 16.09             | 107                  | 665                   | 37.1                 | 27.8                |               |
| Not Clustered | 0                 |                   | 0.01              | 1034                 | 9110685               | 35.6                 | 31.8                |               |

**S. SauNc\* ACC-6-RTC**

MSNTQKKNVPELRFPGFEGEWEEKKLGEFAGKVTQKNVDKKYIETLTNSAELGII SQKDYFDKEIS  
 NIDNIKKYYVVEENDFVYNPRMSNYAPFGPVNRNKLGGKGVMSPLYTVFKIQNIDLNFIEFYFKSS  
 KWYRFMALNGD SGARADRF SIKDRTFMEMPLHIPCMDEQIKIGQFFSKLDRQIELEE QKLELLQQQ  
 KKGYLQKIFSQELRFKDENGNDYPEWRFARFKDFMYKPINIRPAINISKSELLTVKLHCKGIEKAN  
 INRVLKL GATNYYKRFEGQFIY GKQNFN GAFDIVPKKFDGLYSSSDVPAFEINTEKIEPNYFISY  
 ISRPSFYKSKEKYSTGTGSKRIHENTVLNFSLHLPCLNEQLKIASFVCF LNRKIELLERKIYLIKK  
 QKQALLQQMFI PGGSHHHHHH

1 2 3 4 5 6 7 8

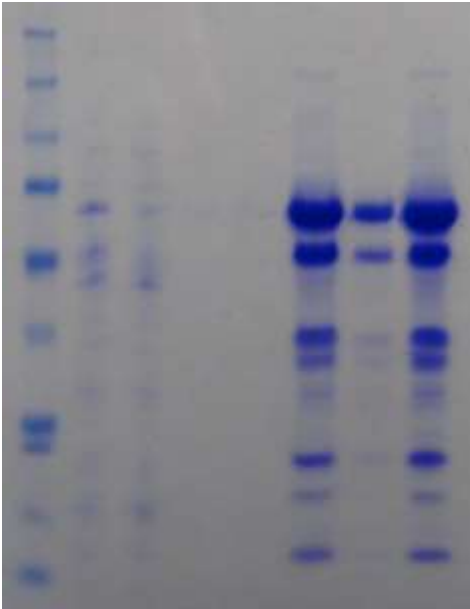

- 1- marker
- 2- soluble cell extract
- 3- Nickel column flow through
- 4- Nickel column wash 1
- 5- Nickel column wash 2
- 6- Nickel column eluate
- 7- eluate after PD10 desalting
- 8- final protein after concentration

Although purified, this MTase was only assayed by SMRT.

| Motifs        |                   |                   |                   |                      |                       |                      |                     |               |
|---------------|-------------------|-------------------|-------------------|----------------------|-----------------------|----------------------|---------------------|---------------|
| Motif         | Modified Position | Modification Type | % Motifs Detected | # Of Motifs Detected | # Of Motifs In Genome | Mean Modification QV | Mean Motif Coverage | Partner Motif |
| ACCNNNNNRTC   | 1                 | m6A               | 90.98             | 4680                 | 5144                  | 48.9                 | 27.4                | GAYNNNNNGGT   |
| GAYNNNNNGGT   | 2                 | m6A               | 90.18             | 4639                 | 5144                  | 50.0                 | 27.8                | ACCNNNNNRTC   |
| HACCVNNNNCTCD | 2                 | m6A               | 16.64             | 117                  | 703                   | 40.7                 | 30.2                |               |
| HGAGNNNNYGGTD | 3                 | m6A               | 16.60             | 86                   | 518                   | 41.5                 | 29.5                |               |
| HACCVNNNHRMC  | 2                 | m6A               | 14.94             | 936                  | 6265                  | 40.2                 | 29.1                |               |
| Not Clustered | 0                 |                   | 0.01              | 1163                 | 9099552               | 35.6                 | 31.2                |               |

S. SauNc\* ACC-6-RTC

Modification QV Histogram By Motif

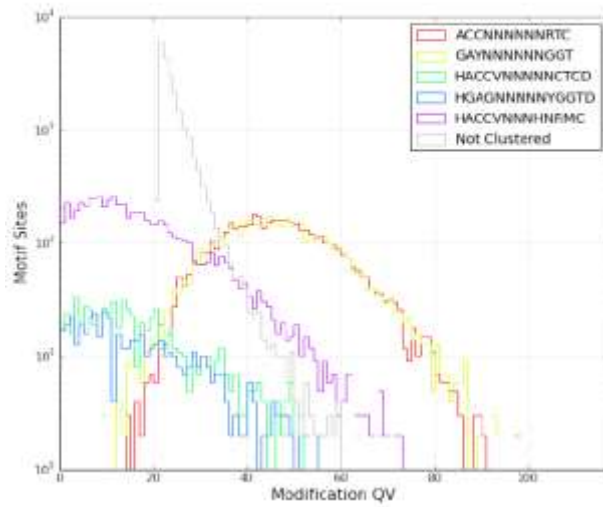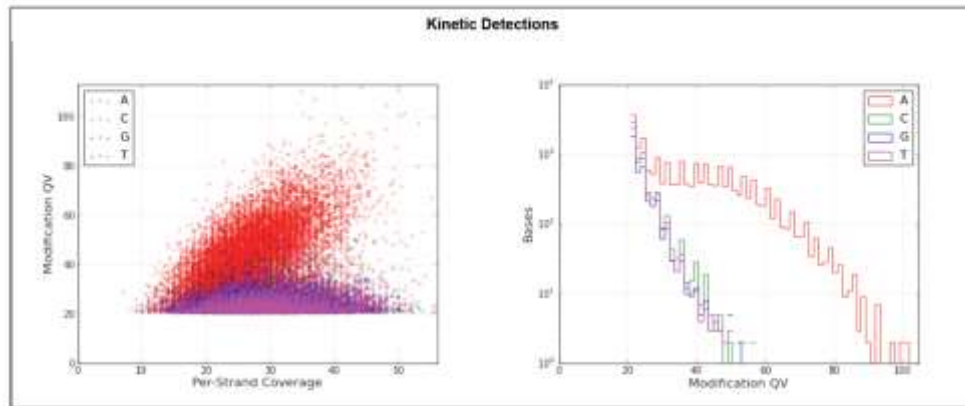

Motifs

| Motif         | Modified Position | Modification Type | % Motifs Detected | # Of Motifs Detected | # Of Motifs in Genome | Mean Modification QV | Mean Motif Coverage | Partner Motif |
|---------------|-------------------|-------------------|-------------------|----------------------|-----------------------|----------------------|---------------------|---------------|
| ACCNNNNNRTC   | 1                 | m6A               | 90.99             | 4690                 | 5144                  | 48.9                 | 27.4                | GAYNNNNNGGT   |
| GAYNNNNNGGT   | 2                 | m6A               | 90.18             | 4639                 | 5144                  | 50.0                 | 27.8                | ACCNNNNNRTC   |
| HACCVNNNNCTCD | 2                 | m6A               | 16.64             | 117                  | 703                   | 40.7                 | 30.2                |               |
| HGAGNNNNYGGTD | 3                 | m6A               | 16.00             | 86                   | 518                   | 41.5                 | 29.5                |               |
| HACCVNNNHFMTC | 2                 | m6A               | 14.94             | 935                  | 6265                  | 40.2                 | 29.1                |               |
| Not Clustered | 0                 |                   | 0.01              | 1163                 | 909552                | 35.6                 | 31.2                |               |

**S. SauNd\* ACC-6-TTRG**

MSNTQKKNVPELRFPGFEGEWEEKKLGEFAGKVTQKNVDKKYIETLTNSAELGIISQKDYFDKEIS  
 NIDNIKKYYVVEENDFVYNPRMSNYAPFGPVNRNKLKGGVMSPLYTVFKIQNIDLNFIEFYFKSS  
 KWYRFMALNGDSGARADRFSIKDRTFMEMPLHIPCMDEQIKIGQFFSKLDRQIELEEQKLELLQQQ  
 KKGYMQKIFSQELRFKDENGNDYPEWENVMLQKVLKDKTEGIKRGPFGGALKKDI FVESGYAVYEQ  
 RNAIYDISNFRYYINENKYKEMQSFSVQPNDIIMSCSGTIGRLALIPHNYTKGIINQALIRFRTNH  
 KIRSEFFLI FMRSNQMQRKILEANPGSAITNLVPVKELKLI PFPLPVKFEQDKISQFIHIINRRIE  
 QSEKKIESLKNRKQGFLQKLFVPPGGSHHHHHH

1 2 3 4 5 6 7 8

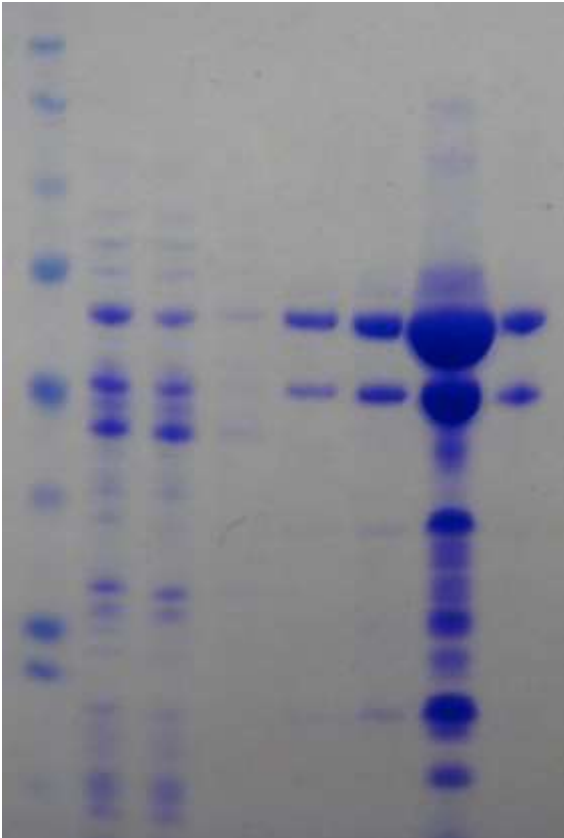

1- marker 2- soluble cell extract 3- Nickel column flow through  
 4- Nickel column wash 5- Nickel column eluate  
 6- eluate after conc. and PD10 desalting  
 7- final protein after concentration 8- NP purified protein marker

DNA cleavage assay.

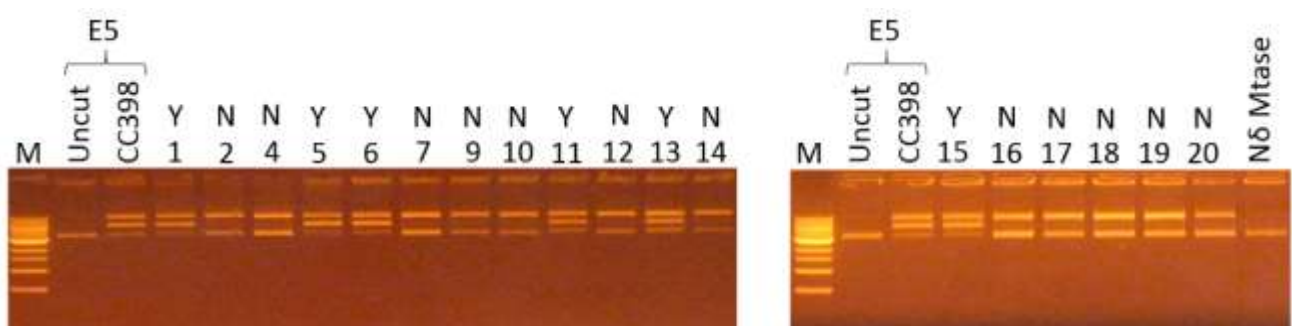

Site determined to be ACC-6-TTRG or ACC-6-YTRG. Note that the underlined site was determined by SMRT and is accepted since if Y is a cytosine, then it can't be methylated.



S. SauNd\* ACC-6-TTRG

Motifs

| Motif          | Modified Position | Modification Type | % Motifs Detected | # Of Motifs Detected | # Of Motifs In Genome | Mean Modification QV | Mean Motif Coverage | Partner Motif |
|----------------|-------------------|-------------------|-------------------|----------------------|-----------------------|----------------------|---------------------|---------------|
| CYAANNNNNGGT   | 4                 | m6A               | 89.98             | 557                  | 619                   | 50.0                 | 29.9                |               |
| ACCNNNNNHTRG   | 1                 | m6A               | 67.06             | 2013                 | 3002                  | 47.5                 | 31.0                |               |
| YHACNNNNNGTGG  | 3                 | m6A               | 30.03             | 88                   | 293                   | 40.5                 | 34.0                |               |
| CYANNNNNGGTDR  | 4                 | m6A               | 20.24             | 102                  | 504                   | 42.0                 | 32.9                |               |
| HNHACNNNNNTRRG | 4                 | m6A               | 17.94             | 127                  | 708                   | 41.5                 | 32.6                |               |
| Not Clustered  | 0                 |                   | 0.02              | 1435                 | 9112200               | 35.8                 | 37.4                |               |

Modification QV Histogram By Motif

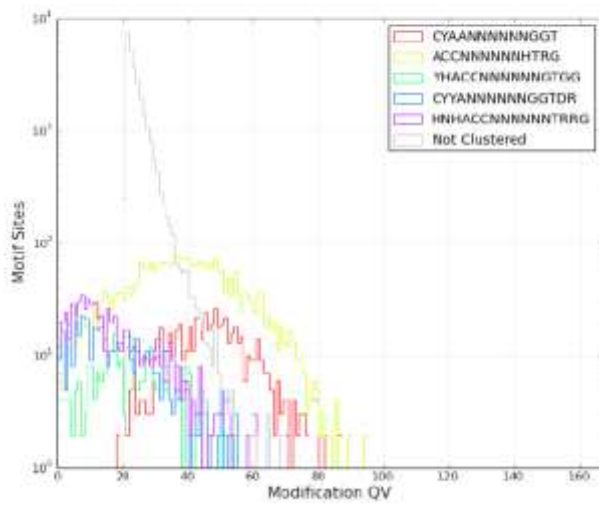

Kinetic Detections

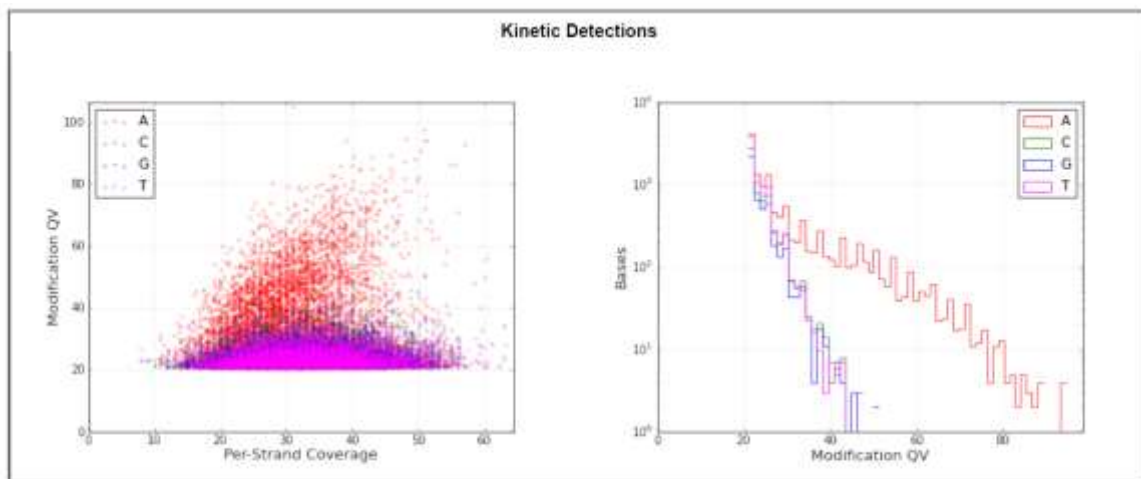

Motifs

| Motif          | Modified Position | Modification Type | % Motifs Detected | # Of Motifs Detected | # Of Motifs In Genome | Mean Modification QV | Mean Motif Coverage | Partner Motif |
|----------------|-------------------|-------------------|-------------------|----------------------|-----------------------|----------------------|---------------------|---------------|
| CYAANNNNNGGT   | 4                 | m6A               | 89.98             | 557                  | 619                   | 50.0                 | 29.9                |               |
| ACCNNNNNHTRG   | 1                 | m6A               | 67.06             | 2013                 | 3002                  | 47.5                 | 31.0                |               |
| YHACNNNNNGTGG  | 3                 | m6A               | 30.03             | 88                   | 293                   | 40.5                 | 34.0                |               |
| CYANNNNNGGTDR  | 4                 | m6A               | 20.24             | 102                  | 504                   | 42.0                 | 32.9                |               |
| HNHACNNNNNTRRG | 4                 | m6A               | 17.94             | 127                  | 708                   | 41.5                 | 32.6                |               |
| Not Clustered  | 0                 |                   | 0.02              | 1435                 | 9112200               | 35.8                 | 37.4                |               |

**S. SauRE GARA-6-RTGA**

MSNTQKKNVPELRFPGFEGEWEEKKLGEVAKIYDGTHQTPKYTNEGIFLSVENIKTLNSSKYISE  
 EAFEKEFKIRPEFGDILMTRIGDIGTPNIVSSNEKFAYYVSLALLKTKNLNSYFLKNLILSSSIQN  
 ELWRKTLHVAFPKKINKNEIGKIKINYPKKQEQQKIGQFFSKLDRQIELEEQKLELLQQQKGYMQ  
 KIFSQELRFKDENGKDYPEWEETTKEIAQINTGKKDKDAITNGSYDFYVRSPIVYKINTFSYEG  
 EAILTVGDGVGVGKVFHYVNGKFDYHQRVYKISDFKNYYGLLLFYYSQNFLKETKKYSAKTSVDS  
 VRKDMIANMKVPRPIYIEQKKIGQFIKRVDNKTQKQVIELLKQRKKSLLQKMFIPGGSHHHHHH  
 1 2 3 4 5 6

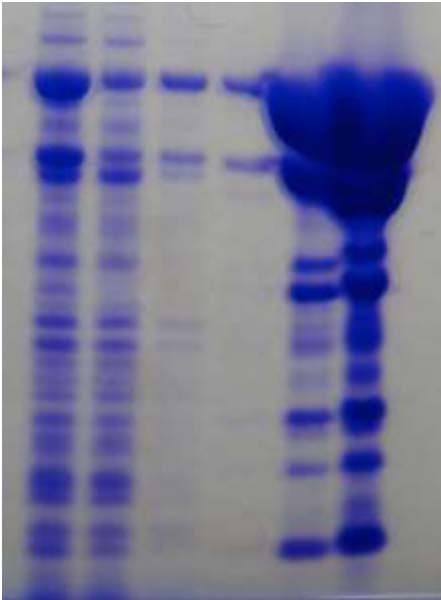

1- soluble cell extract, 2- Nickel column flow through, 3-Nickel column wash 1, 4- Nickel column wash 2, 5- Nickel column eluate, 6- Final protein after PD10 desalting and concentration

Although purified, this MTase was only used in SMRT.

| Motifs         |                   |                   |                   |                      |                       |                      |                     |               |
|----------------|-------------------|-------------------|-------------------|----------------------|-----------------------|----------------------|---------------------|---------------|
| Motif          | Modified Position | Modification Type | % Motifs Detected | # Of Motifs Detected | # Of Motifs In Genome | Mean Modification QV | Mean Motif Coverage | Partner Motif |
| TCAYNNNNNTYTC  | 3                 | m6A               | 91.88             | 792                  | 862                   | 104.6                | 62.5                | GARANNNNNRTGA |
| GARANNNNNRTGA  | 4                 | m6A               | 79.58             | 686                  | 862                   | 96.7                 | 61.7                | TCAYNNNNNTYTC |
| CCACDNNNNTYTC  | 3                 | m6A               | 15.87             | 30                   | 189                   | 90.4                 | 65.5                |               |
| TCAGNNTNNNTCNB | 3                 | m6A               | 15.03             | 29                   | 193                   | 91.0                 | 67.7                |               |
| Not Clustered  | 0                 |                   | 0.00              | 129                  | 9115220               | 85.4                 | 67.9                |               |

S. SauRE GARA-6-RTGA

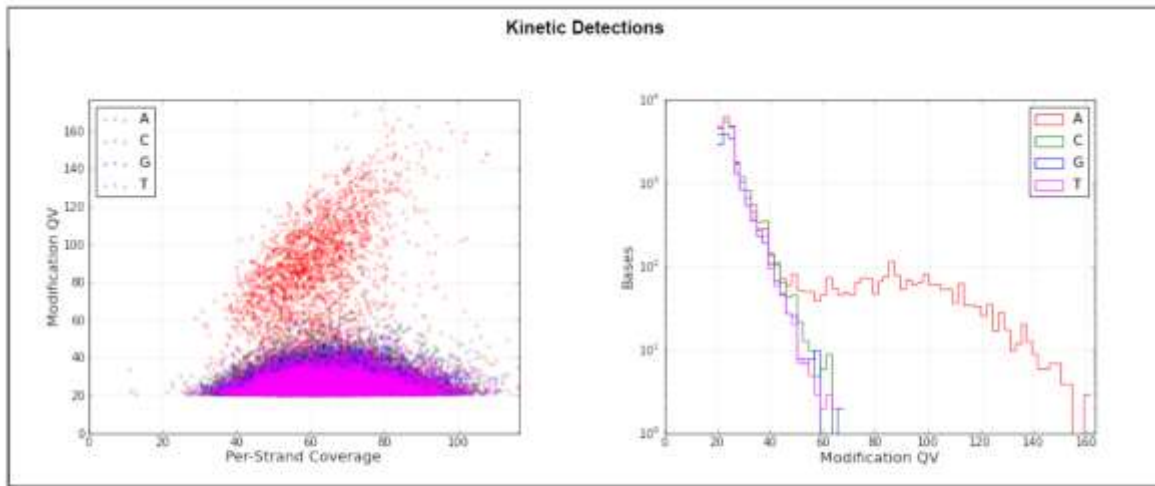

**Motifs**

| Motif           | Modified Position | Modification Type | % Motifs Detected | # Of Motifs Detected | # Of Motifs In Genome | Mean Modification QV | Mean Motif Coverage | Partner Motif |
|-----------------|-------------------|-------------------|-------------------|----------------------|-----------------------|----------------------|---------------------|---------------|
| TCAYNNNNNTYTC   | 3                 | m6A               | 91.88             | 792                  | 862                   | 104.6                | 82.5                | GARANNNNNRTGA |
| GARANNNNNRTGA   | 4                 | m6A               | 79.58             | 686                  | 862                   | 96.7                 | 61.7                | TCAYNNNNNTYTC |
| CCACDNNNNNTYTC  | 3                 | m6A               | 15.87             | 30                   | 189                   | 90.4                 | 65.5                |               |
| TCAGNNTNNNTNCNB | 3                 | m6A               | 15.03             | 29                   | 193                   | 91.0                 | 67.7                |               |
| Not Clustered   | 0                 |                   | 0.00              | 129                  | 9115220               | 85.4                 | 67.9                |               |

Modification QV Histogram By Motif

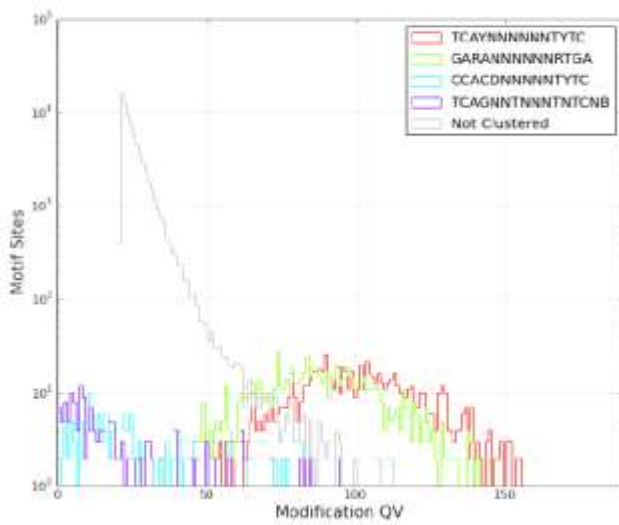

**S. SauTE CAAG-5-RTGA**

MSNTQKKNVPELRFPGFEGEWEEKELGEIFQIIISGSTPLKSNKEFYENGNINWVKTTDLNNSKVTH  
 SKEKITEYAMKSLKLVKNSVLIAMYGGFNQIGRTGLLKIDATINQAISALLMNHETNPEFIQA  
 FLNYQVKGWKRYAASSRKDPNITKKDIEQFKVPYVSINEQQKIGEFFSKIDHQIELEEQKLELLQQ  
 QKKGVMQKIFSQELRFKDENGKDYPEWEETTIIKEIAQINTGKKDTKDAITNGSYDFYVRSPIVYKI  
 NTFSYEGEAILTVGDGVGVGKVFHYVNGKFDYHQRVYKISDFKNYYGLLLFYFYSQNFLKETKKYS  
 AKTSVDSVRKDMIANMKVPRPIYIEQKKIGQFIKRVDNKTQIQQVIELLKQRKSSLLQKMFIPGG  
 SHHHHHH

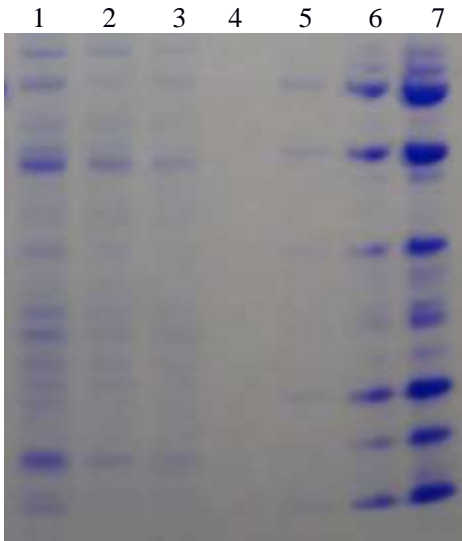

- 1- soluble cell extract
- 2- Nickel column flow through
- 3- Nickel column wash 1
- 4- Nickel column wash 2
- 5- Nickel column eluate
- 6- eluate after concentrating and PD10 step
- 7- Final concentrated protein

This MTase did not purify well and was only analysed by SMRT sequencing. The degeneracy in the target determined by SMRT sequencing can be removed using results from other systems.

| Motifs        |                   |                   |                   |                      |                       |                      |                     |               |
|---------------|-------------------|-------------------|-------------------|----------------------|-----------------------|----------------------|---------------------|---------------|
| Motif         | Modified Position | Modification Type | % Motifs Detected | # Of Motifs Detected | # Of Motifs In Genome | Mean Modification QV | Mean Motif Coverage | Partner Motif |
| CAAGNNNNRTGR  | 3                 | m6A               | 80.15             | 214                  | 267                   | 63.8                 | 42.7                |               |
| YCABNNNNCTTG  | 3                 | m6A               | 55.08             | 260                  | 472                   | 65.1                 | 43.1                |               |
| HTCAYNNNNCMTG | 4                 | m6A               | 47.41             | 238                  | 502                   | 51.7                 | 44.4                |               |
| TCAYNNDNCTVG  | 3                 | m6A               | 31.07             | 119                  | 383                   | 51.0                 | 44.3                |               |
| CNAGNNNNRVTGA | 3                 | m6A               | 28.62             | 170                  | 594                   | 59.5                 | 43.6                |               |
| TCAYTNNNDTTG  | 3                 | m6A               | 16.89             | 38                   | 225                   | 45.4                 | 44.3                |               |
| Not Clustered | 0                 |                   | 0.04              | 3962                 | 9114883               | 35.8                 | 50.6                |               |

S. SauTE

CAAG-5-RTGA

Modification QV Histogram By Motif

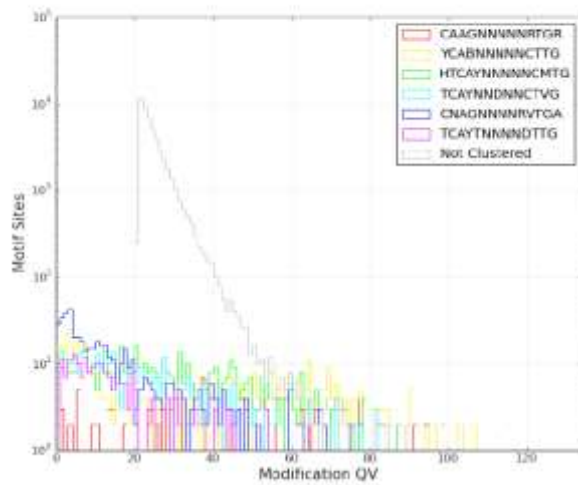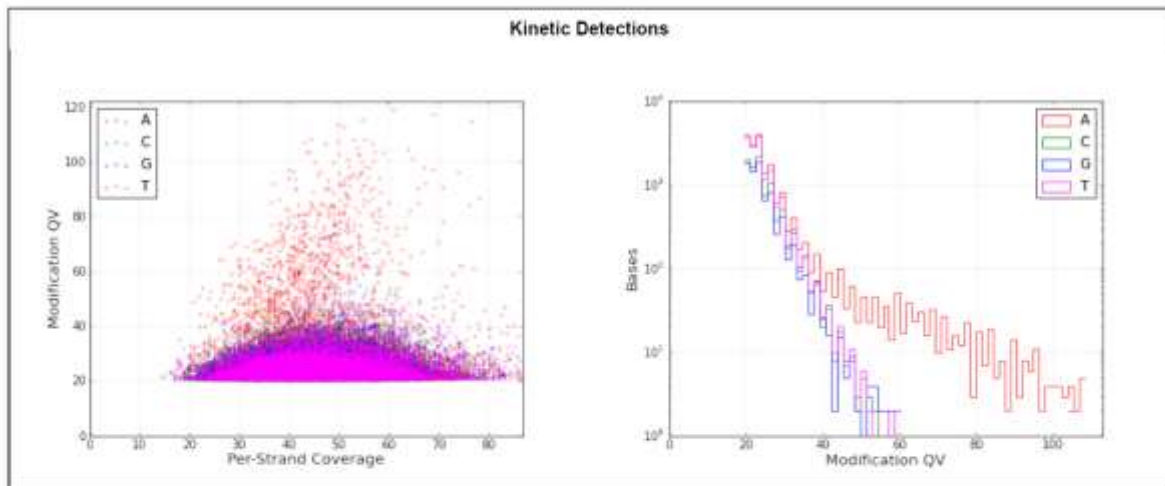

Motifs

| Motif         | Modified Position | Modification Type | % Motifs Detected | # Of Motifs Detected | # Of Motifs In Genome | Mean Modification QV | Mean Motif Coverage | Partner Motif |
|---------------|-------------------|-------------------|-------------------|----------------------|-----------------------|----------------------|---------------------|---------------|
| CAAGNNNNRTGR  | 3                 | m6A               | 80.15             | 214                  | 267                   | 63.8                 | 42.7                |               |
| YCABNNNNCTTG  | 3                 | m6A               | 56.08             | 200                  | 472                   | 65.1                 | 43.1                |               |
| HTCAYNNNNCMTG | 4                 | m6A               | 47.41             | 238                  | 502                   | 51.7                 | 44.4                |               |
| TCAYNNNNCTVG  | 3                 | m6A               | 31.07             | 119                  | 383                   | 51.0                 | 44.3                |               |
| CNAGNNNNRTGA  | 3                 | m6A               | 28.62             | 170                  | 594                   | 59.5                 | 43.6                |               |
| TCAYNNNNDTTG  | 3                 | m6A               | 16.89             | 38                   | 225                   | 45.4                 | 44.3                |               |
| Not Clustered | 0                 |                   | 0.04              | 3062                 | 9114883               | 35.8                 | 50.6                |               |

**S. SauVE CNGA-6-RTGA**

MSNTQKKNVPELRFPGFEGEWEEKELRELRNPKDKYSYTGPFSGDLKKS DYTTDGIQIIQLQNI  
 DGYFYNSNKVFTSNEKAEVLKSCNVFPGDIVIAKMADPIARAAI VPDNNIGKYL MASDGIRLSVDT  
 VHFNTK FVLE C INRKSFRKKVEDNSSGSTRMRIGLSTLGSLTLKTTTLKEQQKIGQFFSKLDRQIE  
 LEEQKLELLQQQKKG YMQKIFSQELRFKDENGKDYPEWEETT I KEIAQINTGKKDTKDAITNGSYD  
 FYVRSPIVYKINTFSYEGEAILTVGDGVGVGKVFHYVNGKFDYHQRVYKISDFKNYYGLLLFYYS  
 QNFLKETKKYSAKTSVDSVRKDMIANMKVPRPIYIEQKKIGQFIKRV DNKTKIQKQVIELLKQRKK  
 SLLQKMFIPGGSHHHHHH

1 2 3 4 5 6 7

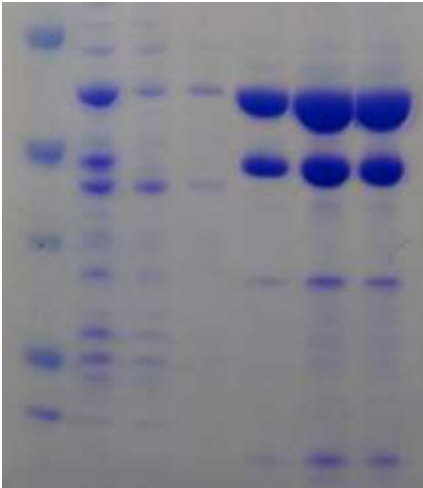

1- marker, 2- soluble cell extract, 3- Nickel column flow through, 4- Nickel column wash, 5- Nickel column eluate, 6- eluate after conc. and PD10 desalting, 7- Final protein after concentration  
 Although the MTase was purified, it was only analysed via SMRT sequencing.

**Motifs**

| Motif          | Modified Position | Modification Type | % Motifs Detected | # Of Motifs Detected | # Of Motifs In Genome | Mean Modification QV | Mean Motif Coverage | Partner Motif  |
|----------------|-------------------|-------------------|-------------------|----------------------|-----------------------|----------------------|---------------------|----------------|
| TCAYNNNNNTCNG  | 3                 | m6A               | 99.34             | 1354                 | 1363                  | 73.0                 | 43.2                | CNGANNNNNRTGA  |
| CNGANNNNNRTGA  | 4                 | m6A               | 98.09             | 1337                 | 1363                  | 71.4                 | 43.4                | TCAYNNNNNTCNG  |
| TCAGBNNNNMTCNG | 3                 | m6A               | 41.58             | 79                   | 190                   | 53.7                 | 43.2                |                |
| VCCAYNNNNVTCNG | 4                 | m6A               | 33.12             | 211                  | 637                   | 50.8                 | 44.7                | CNGABNNNNRTGGB |
| CNGABNNNNRTGGB | 4                 | m6A               | 29.98             | 191                  | 637                   | 50.2                 | 45.8                | VCCAYNNNNVTCNG |
| CNGAYNDNNCTGA  | 4                 | m6A               | 31.90             | 74                   | 232                   | 53.0                 | 44.9                |                |
| HTCAYTNNNNMCNG | 4                 | m6A               | 23.31             | 131                  | 562                   | 44.6                 | 45.5                |                |
| Not Clustered  | 0                 |                   | 0.05              | 4345                 | 9112342               | 35.9                 | 49.9                |                |

S. SauVE CNGA-6-RTGA

Modification QV Histogram By Motif

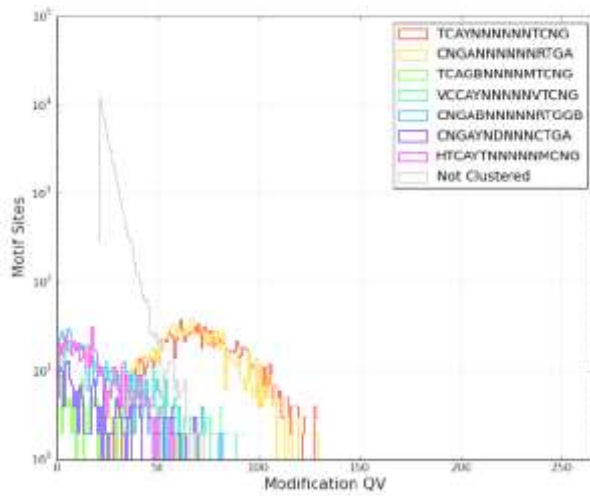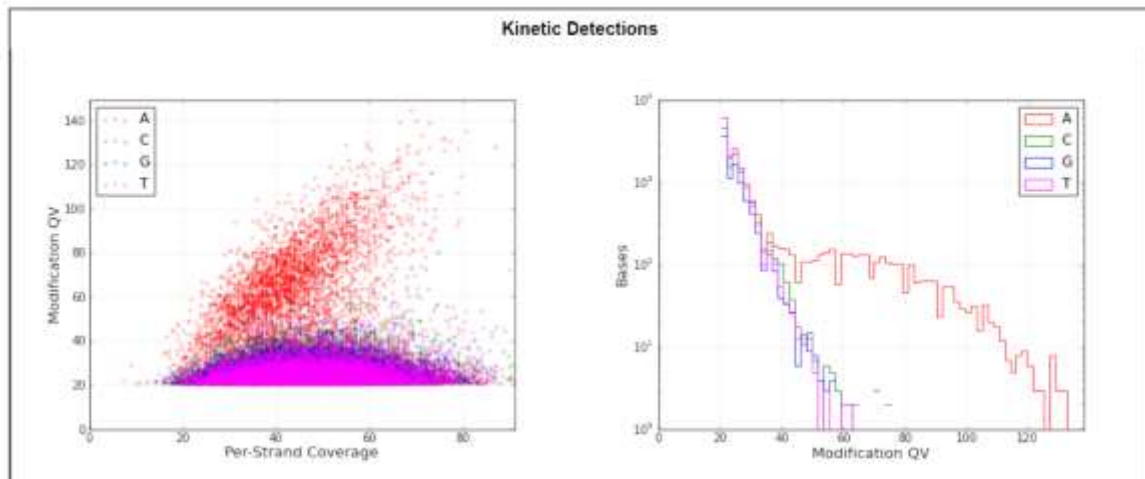

Motifs

| Motif          | Modified Position | Modification Type | % Motifs Detected | # Of Motifs Detected | # Of Motifs In Genome | Mean Modification QV | Mean Motif Coverage | Partner Motif  |
|----------------|-------------------|-------------------|-------------------|----------------------|-----------------------|----------------------|---------------------|----------------|
| TCAYNNNNNTCNG  | 3                 | m6A               | 99.34             | 1354                 | 1383                  | 73.0                 | 43.2                | CNGANNNNNRTGA  |
| CNGANNNNNRTGA  | 4                 | m6A               | 98.09             | 1337                 | 1383                  | 71.4                 | 43.4                | TCAYNNNNNTCNG  |
| TCAGBNNNNMTCNG | 3                 | m6A               | 41.58             | 79                   | 190                   | 53.7                 | 43.2                |                |
| VCCAYNNNNVTCNG | 4                 | m6A               | 33.12             | 211                  | 637                   | 50.8                 | 44.7                | CNGABNNNNRTGGB |
| CNGABNNNNRTGGB | 4                 | m6A               | 29.98             | 191                  | 637                   | 50.2                 | 45.8                | VCCAYNNNNVTCNG |
| CNGAYNDNNCTGA  | 4                 | m6A               | 31.90             | 74                   | 232                   | 53.0                 | 44.9                |                |
| HTCAYTNNNNMCNG | 4                 | m6A               | 23.31             | 131                  | 562                   | 44.6                 | 45.5                |                |
| Not Clustered  | 0                 |                   | 0.05              | 4345                 | 9112342               | 35.9                 | 49.9                |                |

**S. SauXE TCTA-6-RTGA**

MSNTQKKNVPELRFPGFEGEWEEKQFADF<sup>T</sup>KINQGLQIAINERKTEYSPELYFYITNEFLRPNSQT  
 KYFIENPPQS<sup>V</sup>IANKEDILMTRT<sup>G</sup>NTGKVVTNVFGAFHNNFFKIKFDKNLYDRLFLVEVLNSSKIQ  
 NKILSLAGSSTIPDLNHSDFYSISSSYPLLREQQKIGKFFSKLDRQIELEEQKLELLQQQKGYMQ  
 KIFSQELRFKDENGKDYPEWEETT<sup>I</sup>KEIAQINTGKKDTKDAITNGSYDFYVRSPIVYKINTFSYEG  
 EAILTVGDGVGVGKVFHYVNGKFDYHQRVYKISDFKNYYGLLLFYYSQNFLKETKKYSAKTSVDS  
 VRKDMIANMKVPRPIYIEQKKIGQFIKRVDNKT<sup>I</sup>QKQVIELLKQRKKSLLQKMFIPGGSHHHHHH

1 2 3 4 5 6 7

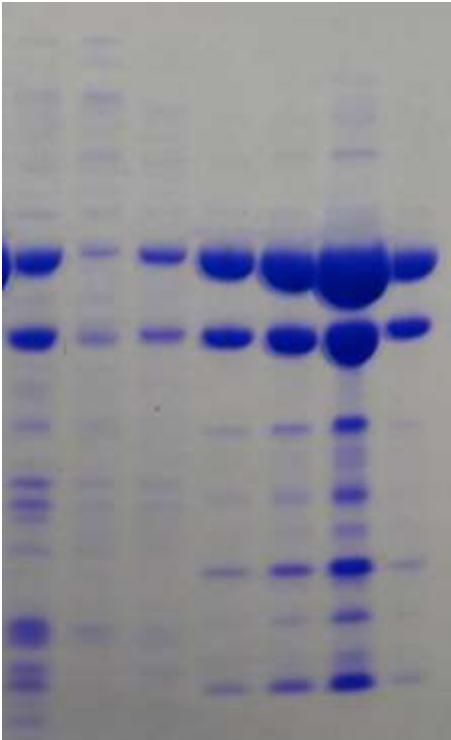

1- soluble cell extract 2- Nickel column flow through  
 3- Nickel column wash 4- Nickel column eluate  
 5- eluate after conc. and PD10 desalting  
 6- final protein after concentration  
 7- CC398-1 purified protein marker  
 DNA cleavage assay.

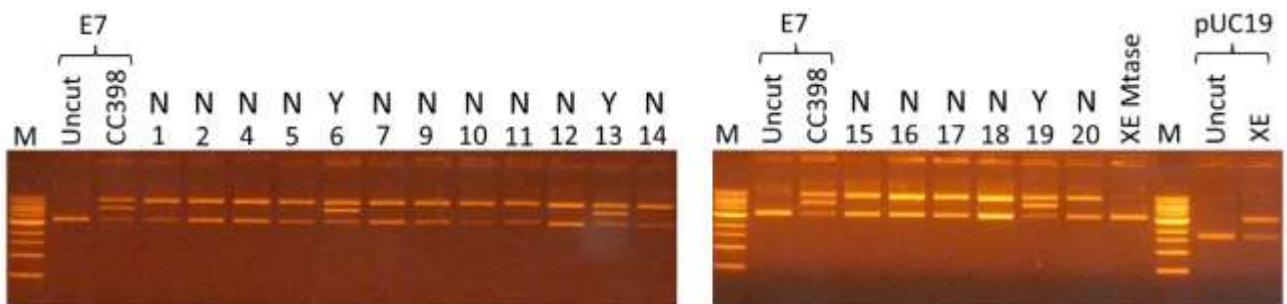



**S. SauXE TCTA-6-RTGA**

The degeneracy in the target determined by SMRT sequencing can be resolved by reference to targets from other systems.

**Motifs**

| Motif            | Modified Position | Modification Type | % Motifs Detected | # Of Motifs Detected | # Of Motifs In Genome | Mean Modification QV | Mean Motif Coverage | Partner Motif |
|------------------|-------------------|-------------------|-------------------|----------------------|-----------------------|----------------------|---------------------|---------------|
| YCABNNNNNTAGA    | 3                 | m6A               | 68.77             | 196                  | 285                   | 121.6                | 104.1               | TCTANNNNNVTGR |
| TCTANNNNNVTGR    | 4                 | m6A               | 68.07             | 194                  | 285                   | 120.0                | 106.6               | YCABNNNNNTAGA |
| DNNTCAYNNNNNTAGY | 6                 | m6A               | 44.57             | 82                   | 184                   | 79.3                 | 103.0               |               |
| RCTANNNNNRTGA    | 4                 | m6A               | 40.41             | 99                   | 245                   | 71.8                 | 104.1               |               |
| HTCAHNNNNNTVGA   | 4                 | m6A               | 32.43             | 156                  | 481                   | 103.9                | 104.2               |               |
| HTCAYNNNNNVAGA   | 4                 | m6A               | 32.07             | 211                  | 658                   | 67.2                 | 107.8               |               |
| Not Clustered    | 0                 |                   | 0.12              | 10813                | 9115188               | 38.1                 | 115.4               |               |

**Modification QV Histogram By Motif**

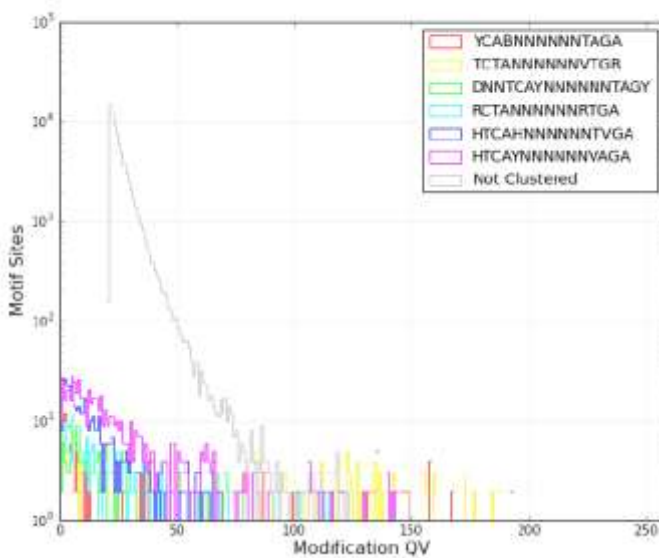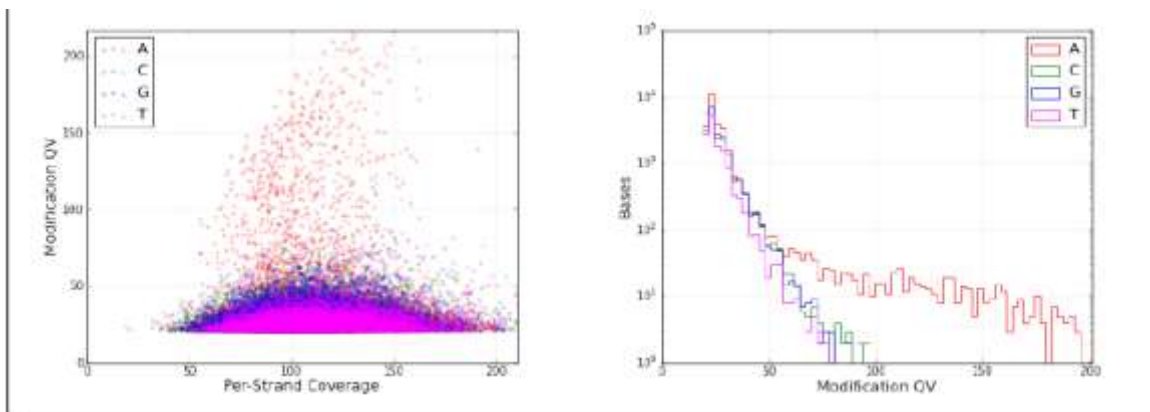

**Motifs**

| Motif            | Modified Position | Modification Type | % Motifs Detected | # Of Motifs Detected | # Of Motifs In Genome | Mean Modification QV | Mean Motif Coverage | Partner Motif |
|------------------|-------------------|-------------------|-------------------|----------------------|-----------------------|----------------------|---------------------|---------------|
| YCABNNNNNTAGA    | 3                 | m6A               | 68.77             | 196                  | 285                   | 121.6                | 104.1               | TCTANNNNNVTGR |
| TCTANNNNNVTGR    | 4                 | m6A               | 68.07             | 194                  | 285                   | 120.0                | 106.6               | YCABNNNNNTAGA |
| DNNTCAYNNNNNTAGY | 6                 | m6A               | 44.57             | 82                   | 184                   | 79.3                 | 103.0               |               |
| RCTANNNNNRTGA    | 4                 | m6A               | 40.41             | 99                   | 245                   | 71.8                 | 104.1               |               |
| HTCAHNNNNNTVGA   | 4                 | m6A               | 32.43             | 156                  | 481                   | 103.9                | 104.2               |               |
| HTCAYNNNNNVAGA   | 4                 | m6A               | 32.07             | 211                  | 658                   | 67.2                 | 107.8               |               |
| Not Clustered    | 0                 |                   | 0.12              | 10813                | 9115188               | 38.1                 | 115.4               |               |

**S. SauZE GAC-5-RTGA**

MSNTQKKNVPELRFPGFEGEYSLDIFGNLATNKSEKFNPNQENASIDIELDCIEQNTGRLIKIYNS  
 KEFSSQKNKFNPNQNVLYGKLRPYLNKYYFTKKSVCSSSEIWLKSTKEDKLLNLFYFIQTKRYS  
 DVASKSAGSKMPRADWGLIENIRVYFPELCEQQKIGQFFSKLDRQIELEEQLLELLQQQKKGVMQK  
 IFSQELRFKDENGKDYPEWEETTIKEIAQINTGKKDTKDAITNGSYDFYVRSPIVYKINTFSYEGE  
 AILTVGDGVGVGKVFHYVNGKFDYHQRVYKISDFKNYYGLLLFYFYSQNFLKETKKYSAKTSVDSV  
 RKDMIANMKVPRPIYIEQKKIGQFIKRVDNKTKIQKQVIELLKQRKKSLLQKMFIPGGSHHHHHH\*

1 2 3 4 5 6 7 8

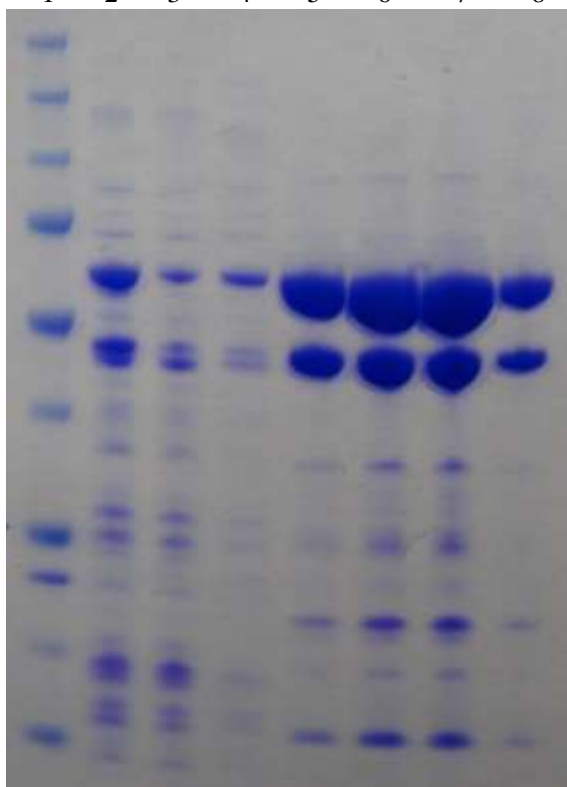

1- marker 2- soluble cell extract 3- Nickel column flow through  
 4- Nickel column wash 5- Nickel column eluate 6- eluate after conc. step and PD10 desalting  
 7- final concentrated protein 8- CC398-1 purified protein marker

DNA cleavage assay showed cutting of all plasmids so the ATPase assay was used given that we knew the individual TRD specificities.

| Oligonucleotide name | DNA sequence (5' to 3')                          |
|----------------------|--------------------------------------------------|
| ZE5for               | AGATGATGGAATCAATGCGACTTCCAGTGAGCCCTATACGATATAA   |
| ZE5rev               | TTATATCGTATAGGGCTCACTGGAAGTCGCATTGATTCCATCATCT   |
| ZE6for               | AGATGATGGAATCAATGCGACTTCCATGTGAGCCCTATACGATATAA  |
| ZE6rev               | TTATATCGTATAGGGCTCACATGGAAGTCGCATTGATTCCATCATCT  |
| ZE7for               | AGATGATGGAATCAATGCGACTTCACATGTGAGCCCTATACGATATAA |
| ZE7rev               | TTATATCGTATAGGGCTCACATGTGAAGTCGCATTGATTCCATCATCT |

S. SauZE GAC-5-RTGA  
N=5 gives the clearest signal.

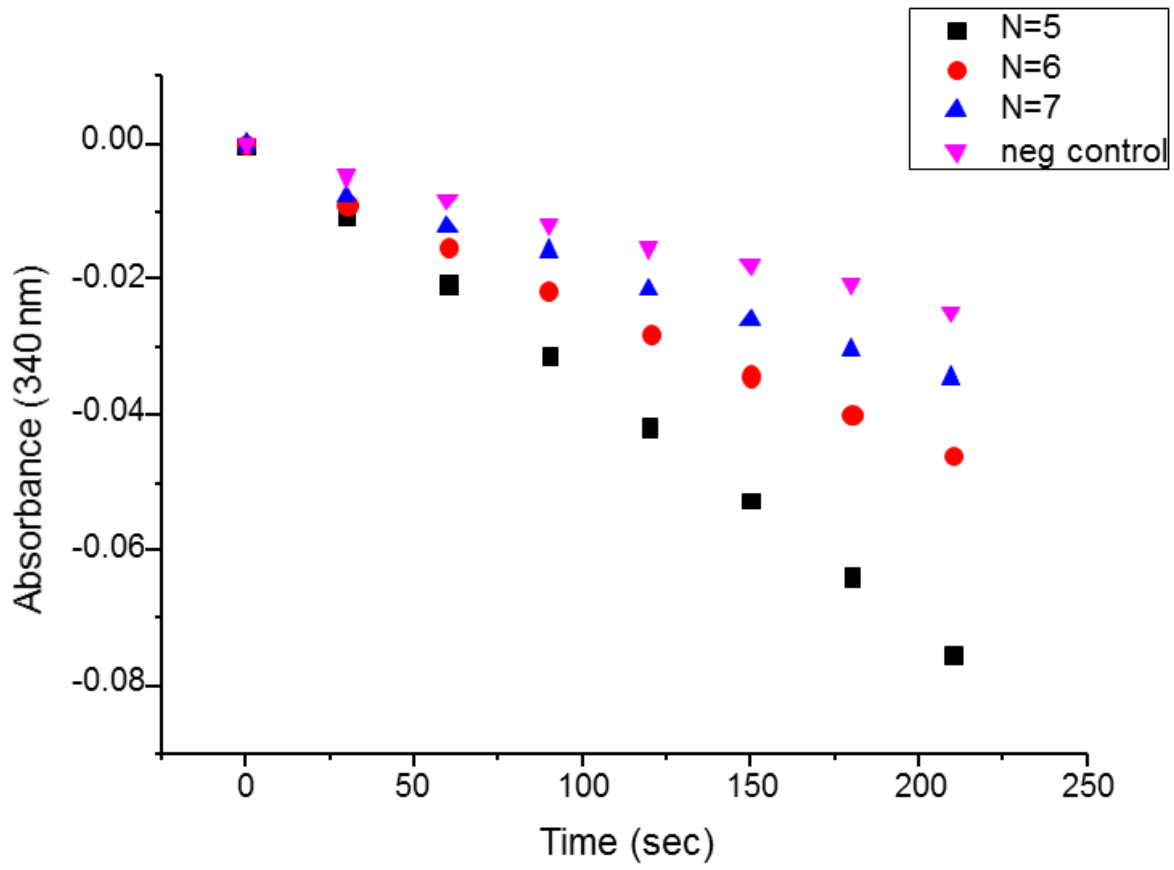

**S. SauzS GAC-6-TGC**

MSNTQKKNVPELRFPGFEGEYSLDIFGNLATNKSEKFNPNQENASIDIELDCIEQNTGRLIKIYNS  
 KEFSSQKNKFNPNQNVLYGKLRPYLNKYYFTKKSGVCSSEIWVLKSTKEDKLLNLFYFIQTKRYS  
 DVASKSAGSKMPRADWGLIENIRVYFPELCEQQKIGQFFSKLDRQIELEEQLLELLQQQKKGVMQK  
 IFSQELRFKDENGNDYPDWTNERLGEVTTVTMGQSPKSVNYTDNSNDTVLIQGNADIENGLINPRI  
 YTREVTKLIQKDEIILTVPVAPVVGKLAMAQINACIGRGVCSIKGDKFLYYFLEWFATQNKWIRFSQG  
 STFESISGNDIRNIHIKIPVEDERTKI I KLLNSLDVLSKTDLKI QNLKQRKQSLLOKIFVPPGSH  
 HHHHH\*

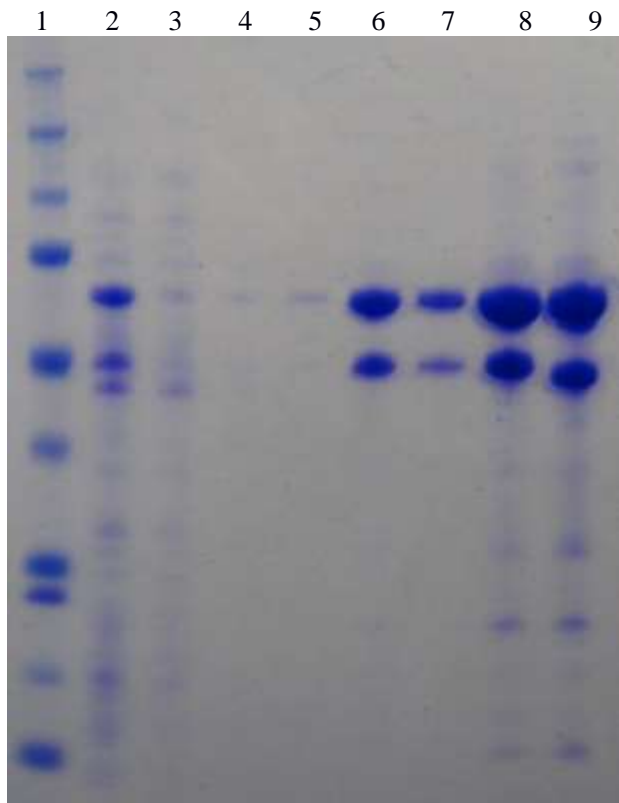

1- marker 2- soluble cell extract 3- Nickel column flow through  
 4- Nickel column wash 1 5- Nickel column wash 2 6- Nickel column eluate  
 7- eluate after PD10 desalting 8- final protein after concentration  
 9- NQ purified protein marker

The DNA cleavage assay showed cutting of all plasmids so the ATPase assay was used since we knew the TRD specificities.

| Oligonucleotide name | DNA sequence (5' to 3')                         |
|----------------------|-------------------------------------------------|
| ZS6for               | AGATGATGGAATCAATGCGACTTCCATTGCGCCCTATACGATATAA  |
| ZS6rev               | TTATATCGTATAGGGCGCAATGGAAGTCGCATTGATTCCATCATCT  |
| ZS7for               | AGATGATGGAATCAATGCGACTTCACATTGCGCCCTATACGATATAA |
| ZS7rev               | TTATATCGTATAGGGCGCAATGTGAAGTCGCATTGATTCCATCATCT |

S. SauzS GAC-6-TGC

N=6 gives the greatest activity.

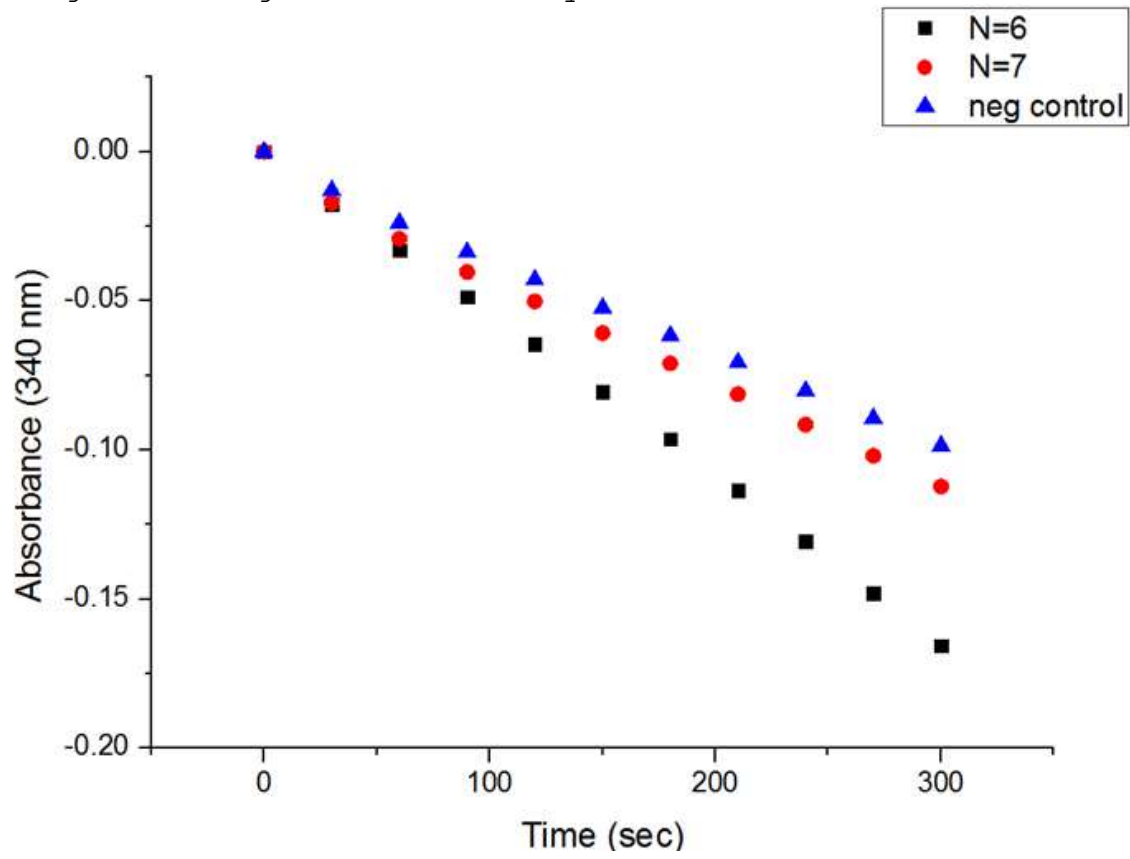

**S. Saub\*E GGHA-6-RTGA**

MSNTQKKNVPELRFPGFEGEWEEKKLEDTLLEFIKDGTHGTHENVNNGPWLLSAKNIKNNKIISSD  
 DRKISESDYKKIYKNYKLEKGDLLLTIVGTIGRAAIVKNPNNIAFQRSVAILKTKATYDVGFIFQL  
 FQTKYFKNLLLRKQVVSQAQPLYLGDIRKIKISITNIEEQRKIGIFFSKLDRQIELEEOKLELLQ  
 QQKKGVMQKIFSQELRFKDENGKDYPEWEETTIKEIAQINTGKKDTKDAITNGSYDFYVRSPIVYK  
 INTFSYEGEAILTVGDGVGVGKVFHYVNGKFDYHQRVYKISDFKNYYGLLLFYFSONFLKETKKY  
 SAKTSVDSVRKDMIANMKVPRPIYIEQKKIGQFIKRVDNKTQKIQKQVIELLKQRKKSLLQKMFIPG  
 GSHHHHHH

1 2 3 4 5 6

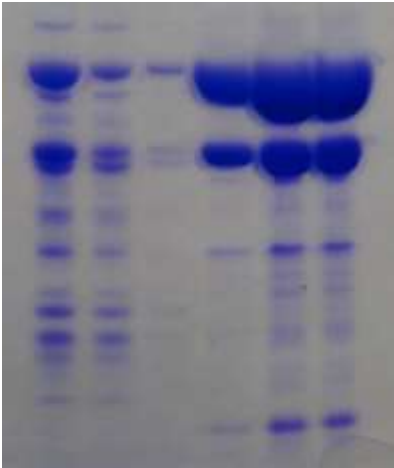

1- soluble cell extract, 2- Nickel column flow through, 3- Nickel column wash, 4- Nickel column eluate, 5- eluate after conc. step and PD10 desalting, 6- Final concentrated protein

Although this MTase was purified, it was only used in the SMRT sequencing assay.

**Motifs**

| Motif         | Modified Position | Modification Type | % Motifs Detected | # Of Motifs Detected | # Of Motifs In Genome | Mean Modification QV | Mean Motif Coverage | Partner Motif |
|---------------|-------------------|-------------------|-------------------|----------------------|-----------------------|----------------------|---------------------|---------------|
| TCAYNNNNNTDCC | 3                 | m6A               | 77.39             | 989                  | 1278                  | 44.5                 | 24.6                | GGHANNNNNRTGA |
| GGHANNNNNRTGA | 4                 | m6A               | 67.68             | 865                  | 1278                  | 43.2                 | 24.7                | TCAYNNNNNTDCC |
| TCAGNDNNNTDCC | 3                 | m6A               | 21.57             | 110                  | 510                   | 41.0                 | 25.2                |               |
| Not Clustered | 0                 |                   | 0.01              | 928                  | 9114260               | 36.7                 | 27.3                |               |

Modification QV Histogram By Motif

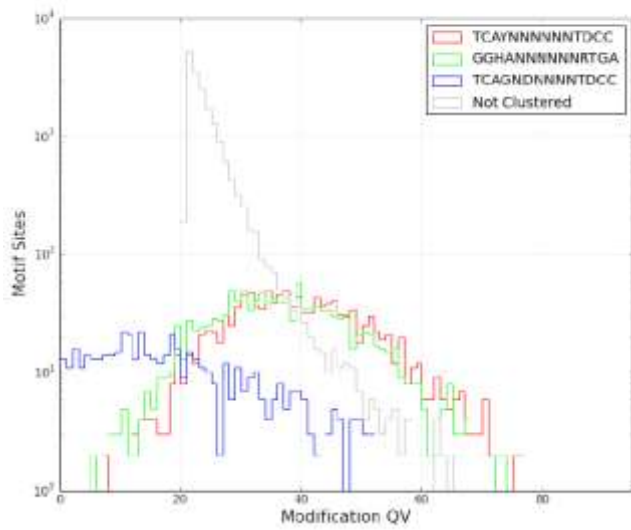

Kinetic Detections

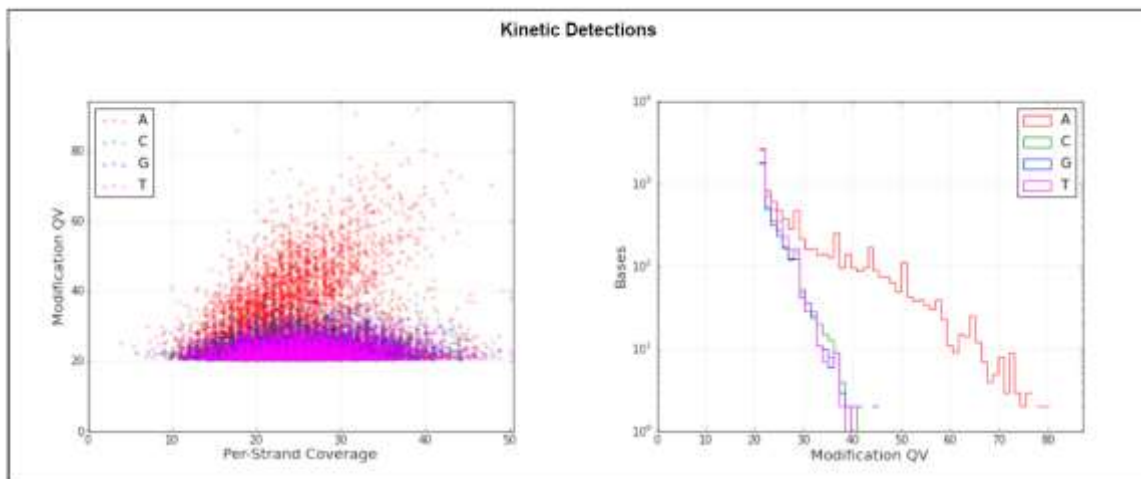

Motifs

| Motif         | Modified Position | Modification Type | % Motifs Detected | # Of Motifs Detected | # Of Motifs In Genome | Mean Modification QV | Mean Motif Coverage | Partner Motif |
|---------------|-------------------|-------------------|-------------------|----------------------|-----------------------|----------------------|---------------------|---------------|
| TCAYNNNNNTDCC | 3                 | m8A               | 77.39             | 989                  | 1278                  | 44.6                 | 24.6                | GGHANNNNNRTGA |
| GGHANNNNNRTGA | 4                 | m8A               | 67.68             | 885                  | 1278                  | 43.2                 | 24.7                | TCAYNNNNNTDCC |
| TCAGNDNNNTDCC | 3                 | m8A               | 21.57             | 110                  | 510                   | 41.0                 | 25.2                |               |
| Not Clustered | 0                 |                   | 0.01              | 928                  | 9114200               | 36.7                 | 27.3                |               |

**S. Saue\*E GAG-6-RTGA**

MSNTQKKNVPELRFPGFEGEWEEKSISSEFLKESKIKGSNGSHAKKLTVKLWGKGVVPPKETFKGSD  
 NTQYYKRKAGQLMYGKLDLNFCAFGIVPDSLNNYESTIDSPSDFDFINGDSKFLLERIKLKSFYKFF  
 GDIANGSRKAKRINQDTFLSLPVFAPKYDEQLRIGEFFSKLDRQIELEEQKLELLQQQKKGVMQKI  
 FSQELRFKDENGKDYPEWEETTIKEIAQINTGKKDTKDAITNGSYDFYVRSPIVYKINTFSYEGEA  
 ILTVGDGVGVGKVFHYVNGKFDYHQRVYKISDFKNYYGLLLFYYFSQNFLKETKKYSAKTSVDSVR  
 KDMIANKVPRPIYIEQKKIGQFIKRVDNKTIKQKQVIELLKQRKKSLLQKMFIPGGSHHHHHH

1 2 3 4 5 6

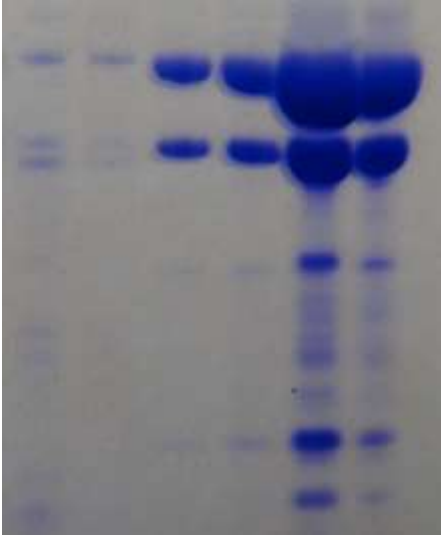

1- soluble cell extract, 2- Nickel column flow through, 3- Nickel column eluate, 4- eluate after PD10 desalting, 5- Final concentrated protein, 6- RE purified protein as marker

DNA cleavage assay.

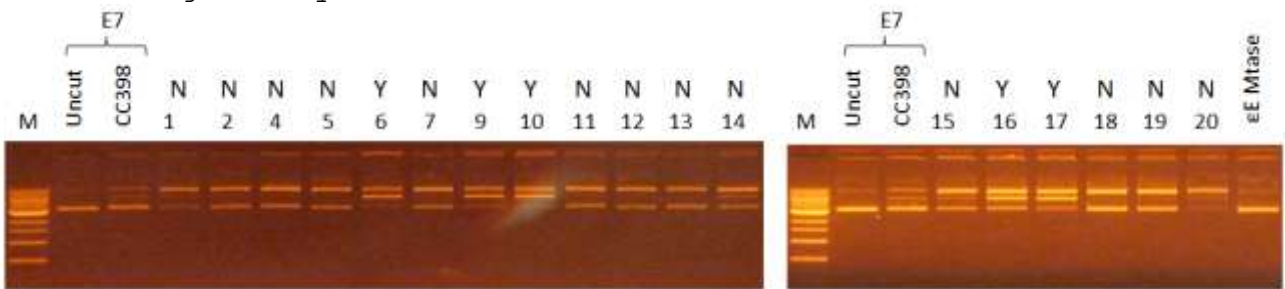



S. Saue\*E GAG-6-RTGA

Motifs

| Motif           | Modified Position | Modification Type | % Motifs Detected | # Of Motifs Detected | # Of Motifs In Genome | Mean Modification QV | Mean Motif Coverage | Partner Motif |
|-----------------|-------------------|-------------------|-------------------|----------------------|-----------------------|----------------------|---------------------|---------------|
| TCAYNNNNNCTC    | 3                 | m6A               | 88.60             | 762                  | 860                   | 49.4                 | 28.5                | GAGNNNNNRTGA  |
| GAGNNNNNRTGA    | 2                 | m6A               | 87.33             | 751                  | 860                   | 50.0                 | 28.2                | TCAYNNNNNCTC  |
| GAGNDNNNGTGGB   | 2                 | m6A               | 20.22             | 37                   | 183                   | 40.9                 | 29.5                |               |
| DNNGAGNDNNNGAGA | 5                 | m6A               | 18.56             | 36                   | 194                   | 39.8                 | 32.7                |               |
| Not Clustered   | 0                 |                   | 0.01              | 914                  | 9115229               | 34.6                 | 36.3                |               |

Kinetic Detections

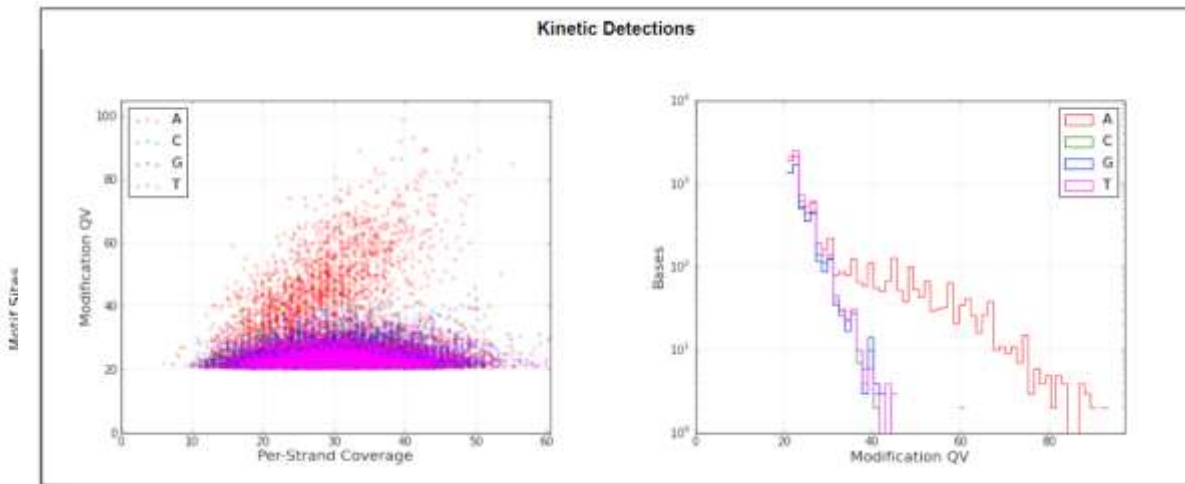

Motifs

| Motif           | Modified Position | Modification Type | % Motifs Detected | # Of Motifs Detected | # Of Motifs In Genome | Mean Modification QV | Mean Motif Coverage | Partner Motif |
|-----------------|-------------------|-------------------|-------------------|----------------------|-----------------------|----------------------|---------------------|---------------|
| TCAYNNNNNCTC    | 3                 | m6A               | 88.60             | 762                  | 860                   | 49.4                 | 28.5                | GAGNNNNNRTGA  |
| GAGNNNNNRTGA    | 2                 | m6A               | 87.33             | 751                  | 860                   | 50.0                 | 28.2                | TCAYNNNNNCTC  |
| GAGNDNNNGTGGB   | 2                 | m6A               | 20.22             | 37                   | 183                   | 40.9                 | 29.5                |               |
| DNNGAGNDNNNGAGA | 5                 | m6A               | 18.56             | 36                   | 194                   | 39.8                 | 32.7                |               |
| Not Clustered   | 0                 |                   | 0.01              | 914                  | 9115229               | 34.6                 | 36.3                |               |

SUPPLEMENTARY INFORMATION FOR TABLE 4.

### S. SauAc\* CCA<sub>Y</sub>-6-RT<sub>C</sub>

The Ac\* TRD combination is found in CC97-1. The MTase was not purified but instead used to methylate the genome of E. coli ER2796 for SMRT analysis. The target is CCA<sub>Y</sub>NNNNNNRT<sub>C</sub>. There are a few minor amino acid differences in the S. SauAc\* between members of CC97.

### CC97

#### Recombinant S. SauAc\*

#### CC97-1

MSNTQKKNVPELRFPGFEGEWEEKKLGDLTTKIGSGKTPKGGSENYTNKGIPFLRSQNIRNGKLNLDLVYISKDIDDEM  
 KNSRTYYGDVLLNITGASIGRTAINSIVEIHANLNQHVCIIIRLKKEYYYNFFGQYLLSRKGRKIFLAQSGGSREGLNFK  
 EIANLKI FTPTIFEEQQKIGEFISKDRQIELEEQKLELLQQQKGYLQKIFSQELRFKDENGNDYPEWRFARFKDFMYK  
 PINIRPAINISKSELLTVKLHCKGIEKANINRVLKLGATNYYKRFEGQFIYKQNFNGAFDIVPKKFDGLYSSDVPAF  
 EINTEKIEPNYFISYISRPSFYKSKEKYSTGTGSKRIHENTVLNFSLHLPCLNEQLKIASFVCFLNKRIELLERKIYLIK  
 KQKQALLQQMFI PGGSHHHHHH

#### Wild Type S. SauAc\*

MSNTQKKNVPELRFPGFEGEWEEKQLGDLTTKIGSGKTPKGGSENYTNKGIPFLRSQNIRNGKLNLDLVYISKDIDDEM  
 KNSRTYYGDVLLNITGASIGRTAINSIVETHANLNQHVCIIIRLKKEYYYIFFGQYLLSRKGRKIFLAQSGGSREGLNFK  
 EIANLKI FTPTIFEEQQKIGKFFSKDRQIELEEQKLELLQQQKGYLQKIFSQELRFKDENGNDYPEWRFARFKDFMYK  
 PINIRPAINISKSELLTVKLHCKGIEKANINRVLKLGATNYYKRFEGQFIYKQNFNGAFDIVPKKFDGLYSSDVPAF  
 EINTEKIEPNYFISYISRPSFYKSKEKYSTGTGSKRIHENTVLNFSLHLPCLNEQLKIASFVCFLNKRIELLERKIYLIK  
 KQKQALLQQMFI\*

SMRT Cells: 1 Movies: 1

| Motif Summary |                   |      |                   |                      |                       |                      |                     |               |
|---------------|-------------------|------|-------------------|----------------------|-----------------------|----------------------|---------------------|---------------|
| Motifs        | Modified Position | Type | % Motifs Detected | # Of Motifs Detected | # Of Motifs In Genome | Mean Modification QV | Mean Motif Coverage | Partner Motif |
| CCAYNNNNNRTC  | 3                 | m6A  | 97.52%            | 2199                 | 2255                  | 68.95                | 50.78               | GAYNNNNNRTGG  |
| GAYNNNNNRTGG  | 2                 | m6A  | 96.01%            | 2165                 | 2255                  | 68.50                | 51.01               | CCAYNNNNNRTC  |

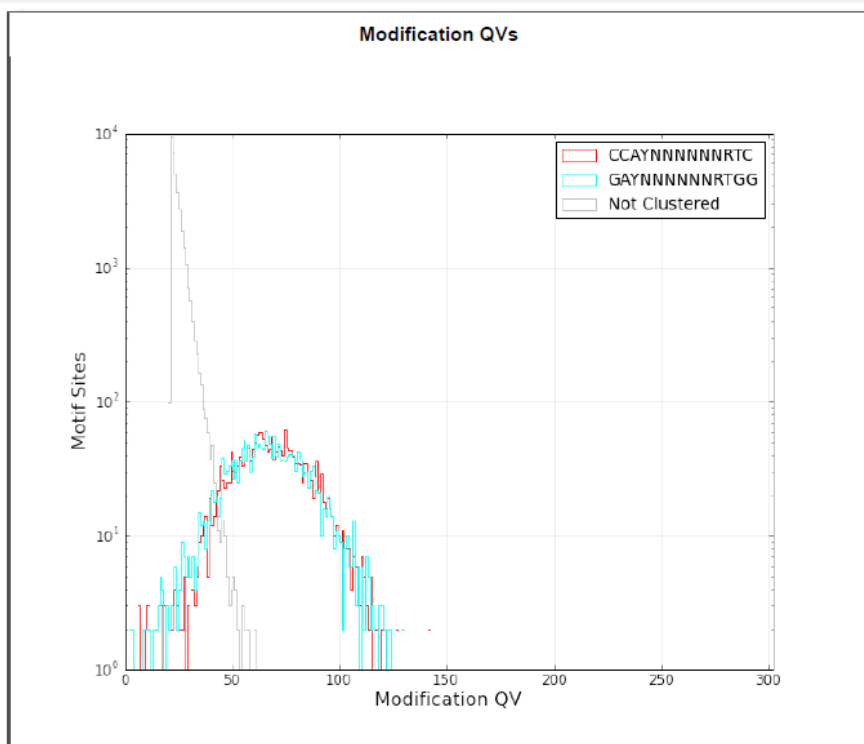

S. SauBI-EGFP

CC22-1 AGG-6-TGAR

This MTase was expressed and purified as a fusion with EGFP.

Nuclease assays and SMRT analysis gave the same target site.

MSNTQKKNVPELRFPGFEGEWEEKKLGDLTDRVIRKNKNLESKKPLTISGQLGLIDQTEYFSSKSVS  
SKNLENYTLIKNGEFAYNKSYSNGYPLGAIKRLTRYDSGVLSSLYICFSIKSEMSKDFMEAYFDST  
HWYREVSGIAVEGARNHGLLNVSVDFFFTILIKYPSLEEQQKIGKFFSKLDRQIELEEQKLELLQO  
QKKGYMOKIFSQELRFKNENGNDYPDWERIKFFDVIDKVIDFRGRTPKKNMEWSDEGYLALSAVN  
VKKGYIDFNVEAKYGNLDLYTRWMRGNELYKGQVLFTEAPMGNVAQVPDNKGYILSQRTIAFNSN  
EKITDNFLASLLSSENVYNDLLKLCGATAKGVSQKNLNRLYVTI PHSI SEQEEIAEFFR KINQLV  
ELQKYKIEHTKSQKQVFLQKMF IGSMVSKGEELFTGVVPILVELDGDVNGHKFSVSGEGEGDATYG  
KLTLKFICTTGKLPVPWPTLVTTLT YGVQCFSRYPDHMKQHDFFKSAMPEGYVQERTIFFKDDGNY  
KTRAEVKFEGDTLVNRIELKGIDFKEDGNILGHKLEYNNSHN VYIMADKQKNGIKVNFKIRHNIE  
DGSVQLADHYQQNTPIGDGPVLLPDNHYLSTQSALS KDPNEKRDH MVLLEFVTAAGITLGMDELYK  
HHHHHH

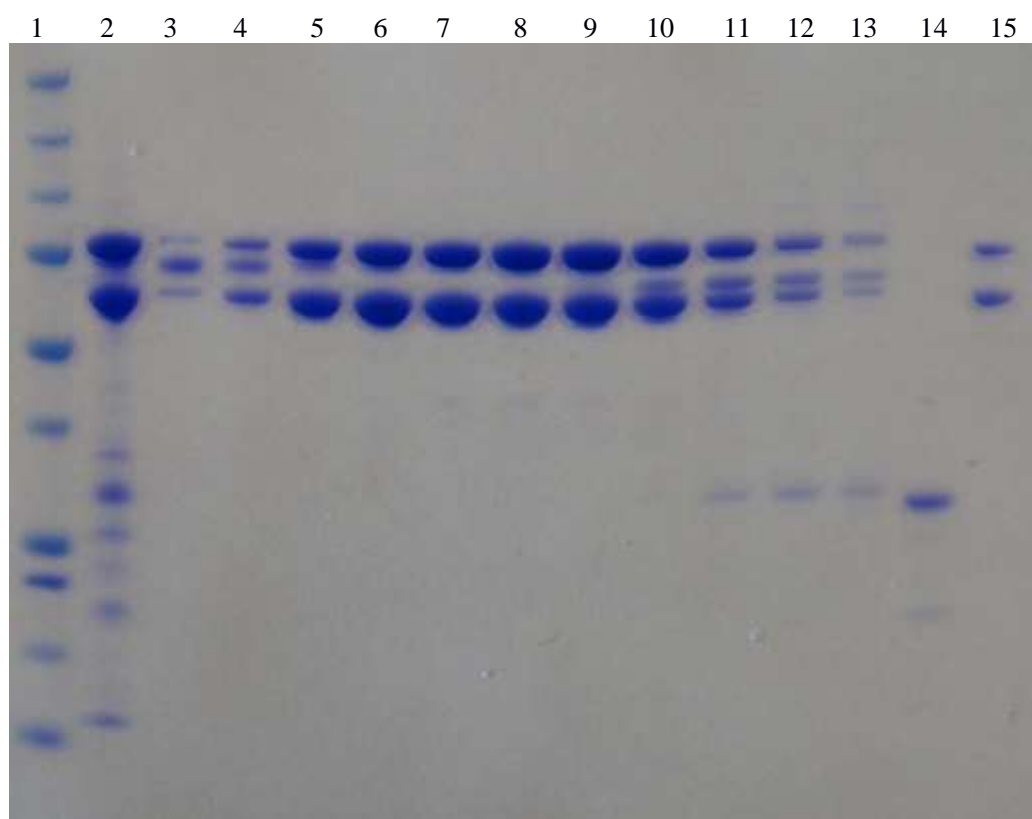

1- marker 2- Nickel column eluate 3-14 Fractions from gel filtration column  
15- CC5-1 Purified protein marker

**S. SauBI-EGFP**  
**CC22-1**     **AGG-6-TGAR**

DNA cleavage assay

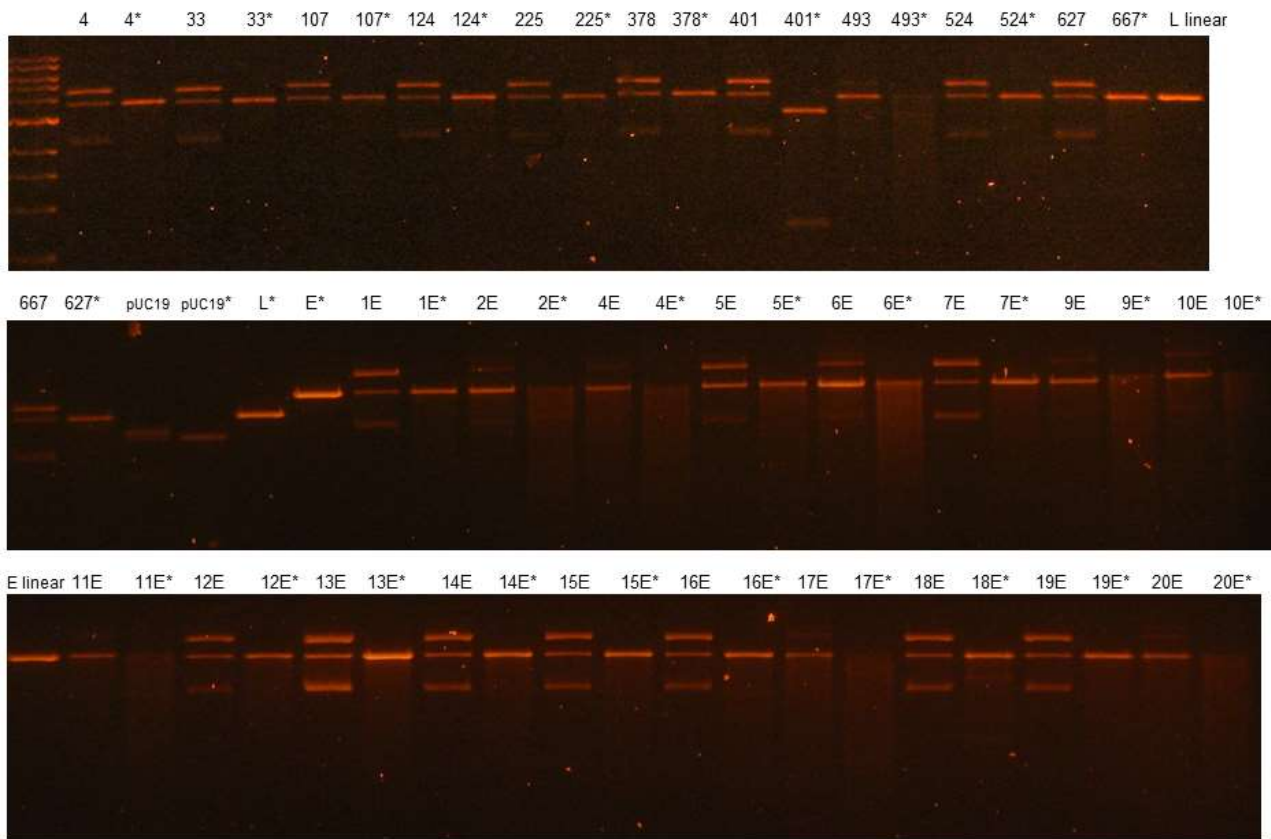

S. SauBI-EGFP

CC22-1 AGG-6-TGAR

| Motif                | Modified Position | Modification Type | % Motifs Detected | # Of Motifs Detected | # Of Motifs In Genome | Mean Modification QV | Mean Motif Coverage | Partner Motif |
|----------------------|-------------------|-------------------|-------------------|----------------------|-----------------------|----------------------|---------------------|---------------|
| YTCANNNNNNCCT        | 4                 | m6A               | 99.24             | 919                  | 926                   | 86.2                 | 56.3                | AGGNNNNNNTGAR |
| AGGNNNNNNTGAR        | 1                 | m6A               | 99.24             | 919                  | 926                   | 83.9                 | 55.7                | YTCANNNNNNCCT |
| <i>Not Clustered</i> | 0                 |                   | 0.06              | 5230                 | 9124356               | 34.8                 | 61.5                |               |

Modification QV Histogram By Motif

Modification QV Histogram

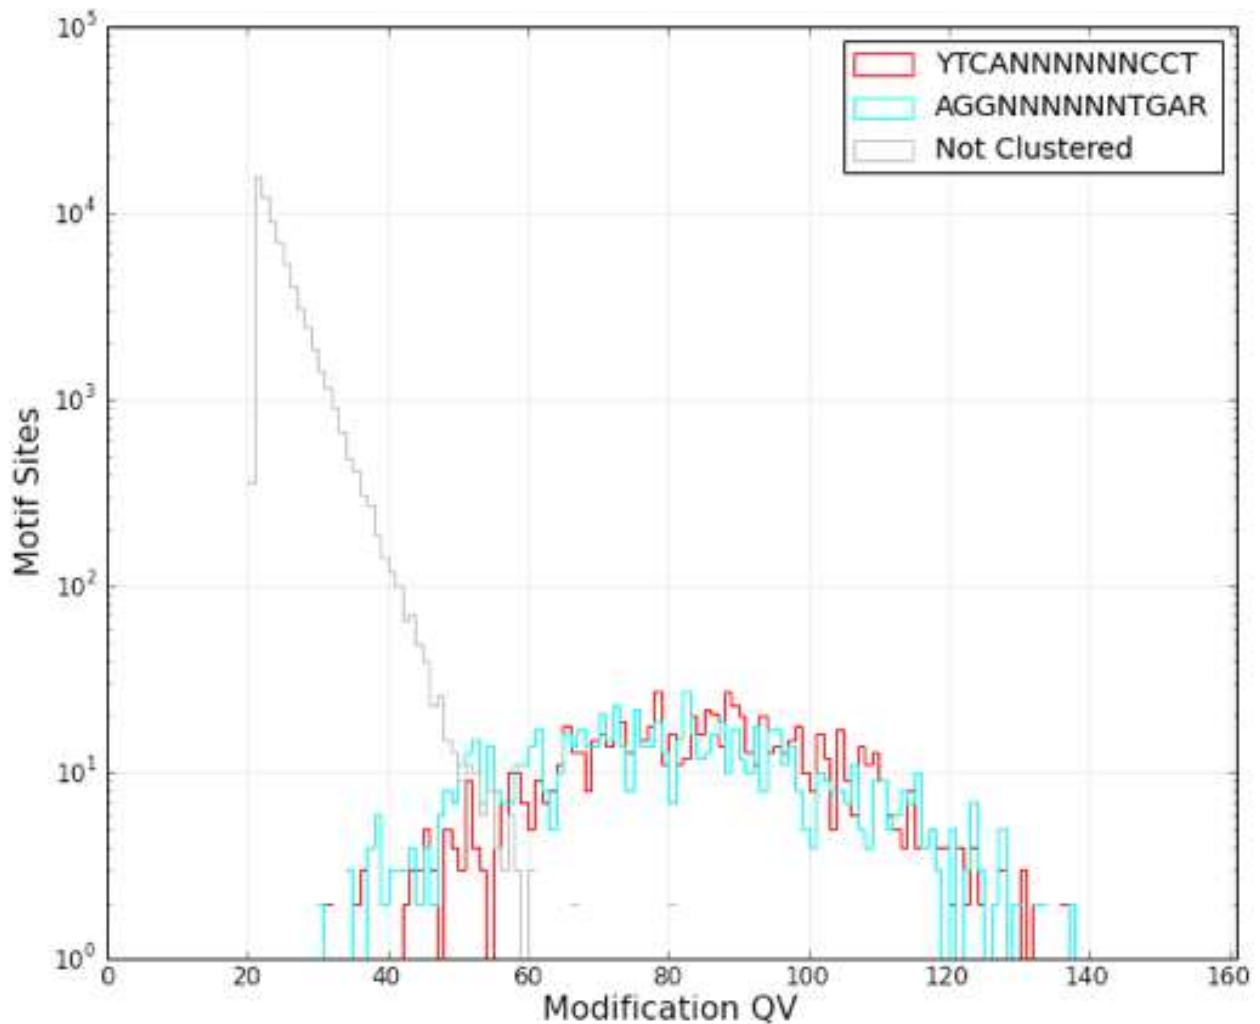

**S. SauCE**

**ST425-1 GWAG-5-RTGA**

The recombinant enzyme with TRDs C and E was purified and used in the nuclease assay. There are minor differences in amino acid sequence between members of ST425-1.

**Recombinant S. SauCE CC425-1 GWAG-5-RTGA**

MSNTQKKNVPELRFPGFEGEWEEKKVGELLEFKNGLNKGKEYFGSGSSIVNFKDVFNNRSINTNNL  
TGKVVNNSKELKNYSVEKGDVFFTRTSEVIGEIGYPSVILNDPENTVFSGFVLRGRPKSGIDLIN  
NFKRYVFFFTNSFRKEMITKSSMTTRALTSGTAINRMKVIYPVSAKEQKKIGDFFSKLDRQIELEE  
QKLELLQQQKKGMYQKIFSQELRFKDENGKDYPEWEETTIKEIAQINTGKKDTKDAITNGSYDFYVR  
SPIVYKINTFSYEGEAILTVGDGVGVGKVFHYVNGKFDYHQRVYKISDFKNYYGLLLFYYFSQNFL  
KETKKYSAKTSVDSVRKDMIANMKVPRPIYIEQKKIGQFIKRVDNKTQKQVIELLKQRKKSLLQ  
KMFIPGGSHHHHHH

**Wild type S. SauCE**

MSNTQTKNVPELRFPGFEGEWEEKQVGELLEFKNGLNKGKEYFGSGSSIVNFKDVFNNRSINTNNL  
TGKVVNNSKELKNYSVEKGDVFFTRTSEVIGEIGYPSVILNDPENTVFSGFVLRGRPKSGIDLIN  
NFKRYVFFFTNSFRKEMITKSSMTTRALTSGTAINKMKVIYPVSAKEQKKIGDFFSKLDRQIELEE  
QKLELLQQQKKGMYQKIFTQELRFKDENGNDYPEWEETTIKEIAQINTGKKDTKDAITNGSYDFYVR  
SPIVYKINTFSYEGEAILTVGDGVGVGKVFHYVNGKFDYHQRVYKISDFKNYYGLLLFYYFSQNFL  
KETKKYSAKTSVDSVRKDMVANMKVPRPIYIEQEKIGQFIKKVDNKIKIQKQVIELLKQRKALLQ  
KMF I \*

1 2 3 4 5 6 7 8 9 10 11 12 13 14 15

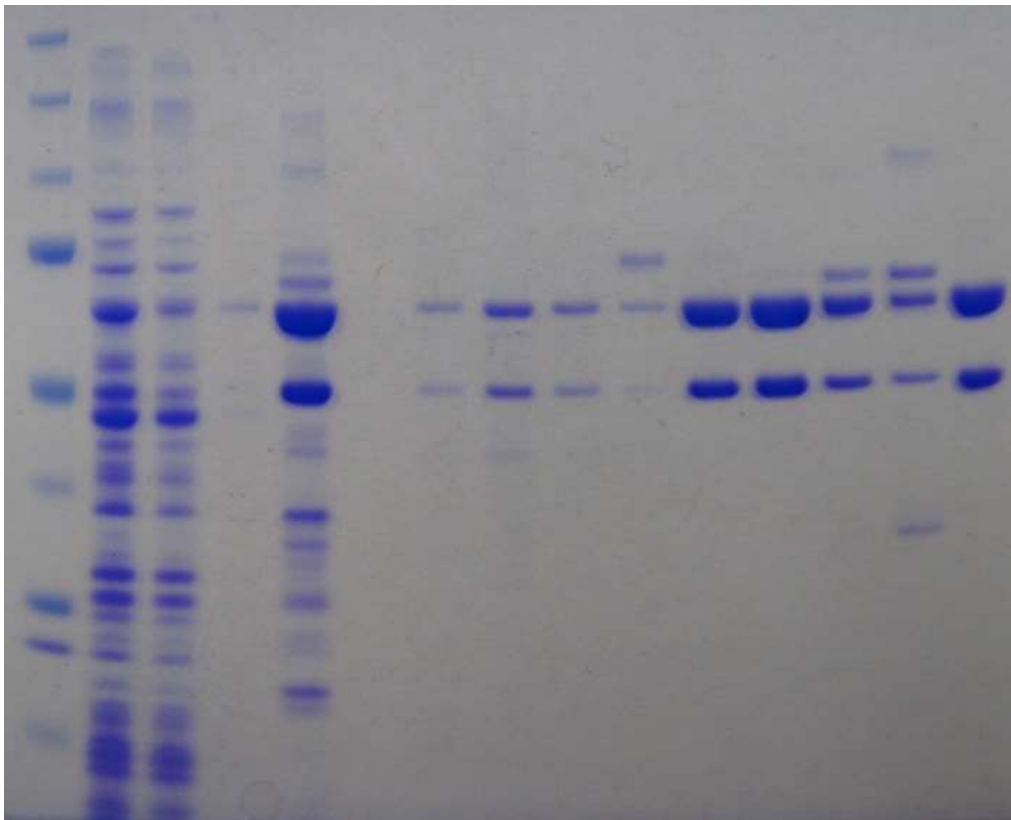

1- marker 2- soluble cell extract 3- flow through from Nickel column 4- wash from Nickel column  
5- eluate from Nickel column 6-14 Fractions from gel filtration column 15- CC398-1 purified protein marker

S. SauCE  
ST425-1 GWAG-5-RTGA

DNA cleavage assay.

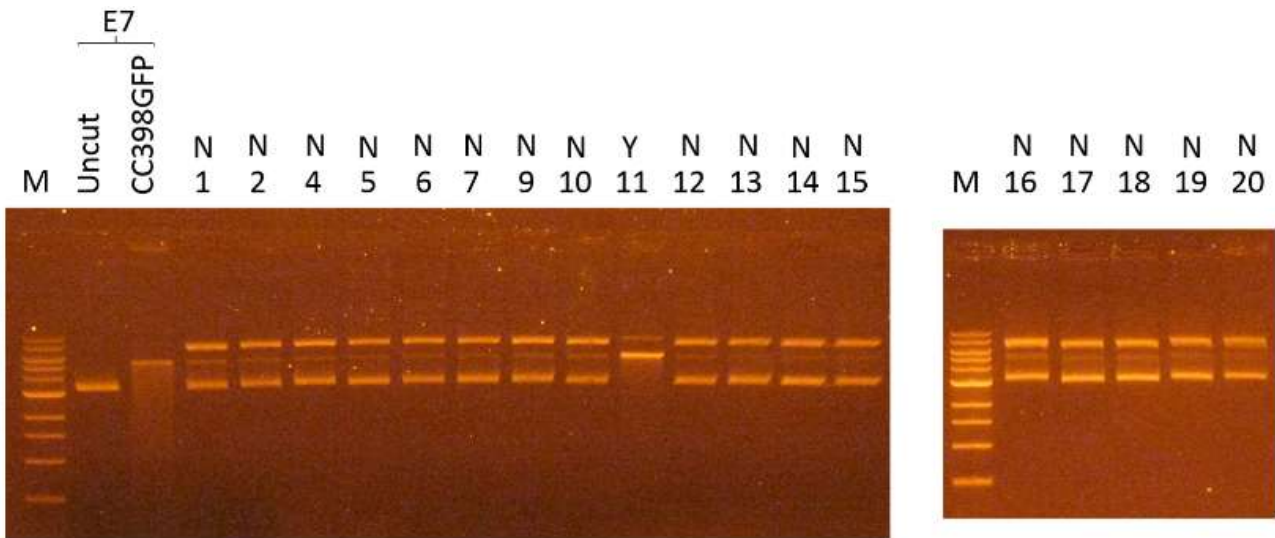



**S. SauJP**

**CC51 GGA-6-CCT**

**This MTase was used in the SMRT analysis of *E. coli* ER2796.**

**There are minor variations in the sequences of the S subunits in CC51.**

**Recombinant S. SauJP CC51-1**

MSNTQKKNVPELRFPGFEGEWEEKKLGDLIKVNSGKDYKHLEKGDIPVYGTGGYMTSVSEPLSEID  
AVGIGRKGTINKPYLLEAPFWTVDTLIFYCTPKKETDILFILSLFRKINWKVYDESTGVPSLSKQTI  
NKINRFVPSNKEQQKIGEFFIKLDRQIELEEQKLELFQQQKKGVMQKIFSQELRFKDESGNDYPDW  
EEKELGEVADR VIRKNKNFESKKPLTISGQLGLIDQTEYFSKSVSSKNLENYTLIKNGEFAYNKSY  
SNGYPLGAIKRLTRYDSGVLSSLYICFSIKSEMSKDFMEAYFDSTHWYREVSGIAVEGARNHGLLN  
ISVNDFFTILIKYPSLEEQRKIGDFFIKLDRQIELEEQKLELLQQRKKALLKSMLIPGGSHHHHHH

**Wild Type S. SauJP**

MSNTQTKNVPELRFPGFEGEWEEKKLEDI IKVNSGKDYKHLDKGDIPVYGTGGYMTSVSEPLSEID  
AVGIGRKGTINKPYLLEAPFWTVDTLIFYCTPKKETDILFILSLFRKINWKVYDESTGVPSLSKQTI  
NKINRFVPTNKEQQKIGKFFSKLDRQIELEEQKLELFQQQKKGVMQKIFSQELRFKDESGNDYPDW  
EEKELGEVADR VIRKNKNFESKKPLTISGQLGLIDQTEYFSKSVSSKNLENYTLIKNGEFAYNKSY  
SNGYPLGAIKRLTRYDSGVLSSLYICFSIKSEMSKDFMEAYFDSTHWYREVSGIAVEGARNHGLLN  
ISVNDFFTILIKYPSLEEQRKIGDFFIKLDRQIELEEQKLELLQQRKKALLKSMLI

**Reports for Job Dryden\_J\_P\_MODs**

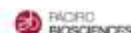

SMRT Cells: 1 Movies: 1

| Motif Summary |                   |      |                   |                      |                       |                      |                     |               |
|---------------|-------------------|------|-------------------|----------------------|-----------------------|----------------------|---------------------|---------------|
| Motifs        | Modified Position | Type | % Motifs Detected | # Of Motifs Detected | # Of Motifs In Genome | Mean Modification QV | Mean Motif Coverage | Partner Motif |
| GGANNNNNCCT   | 3                 | m6A  | 98.1%             | 1340                 | 1366                  | 62.31                | 39.31               | AGGNNNNNTCC   |
| AGGNNNNNTCC   | 1                 | m6A  | 97.58%            | 1333                 | 1366                  | 61.04                | 39.18               | GGANNNNNCCT   |
| BNAGANNNNACCH | 3                 | m6A  | 46.26%            | 99                   | 214                   | 47.92                | 39.46               |               |

### Modification QVs

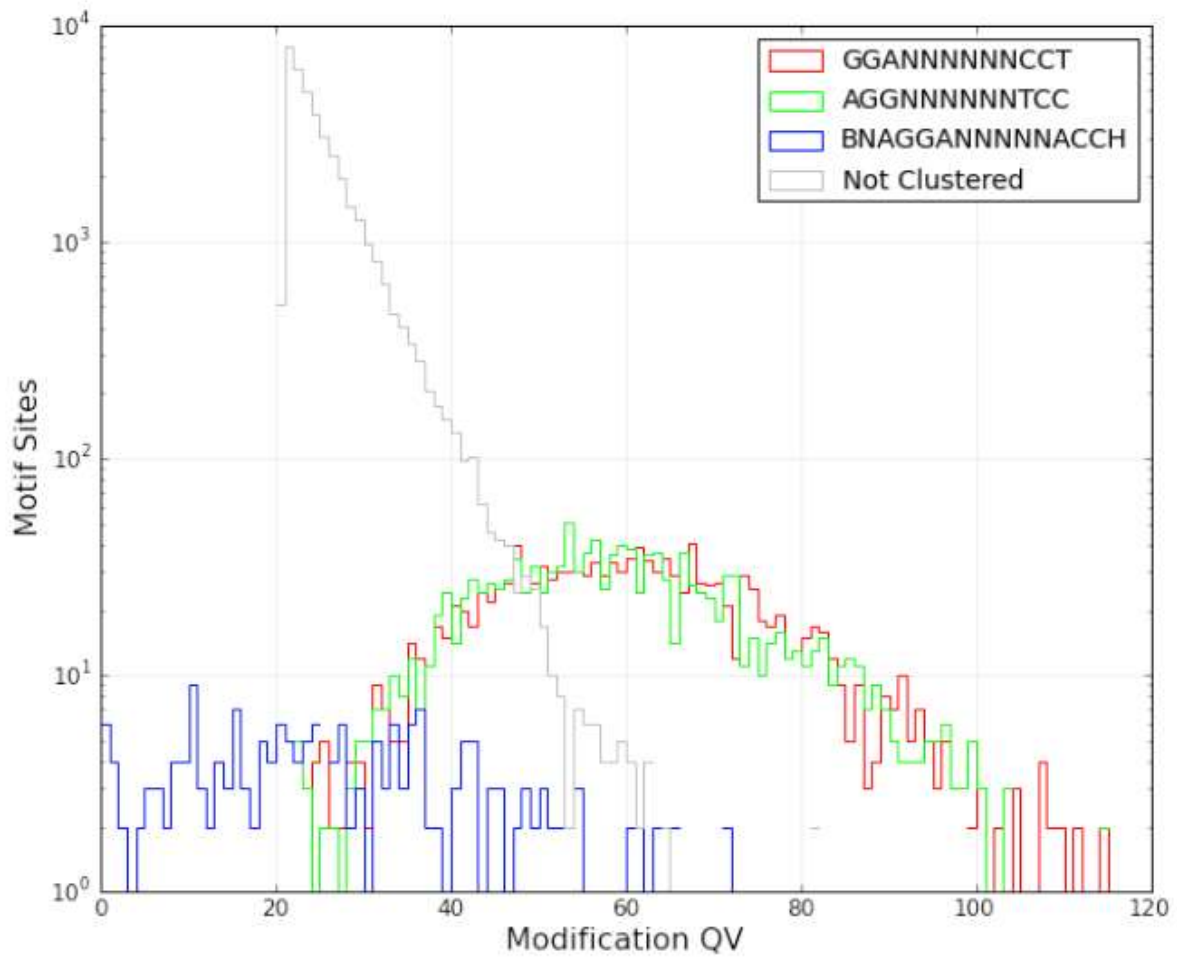

**S. SauCL-EGFP**

**CC45-1 GWAG-6-TAAA**

Two separate clones of pSauCL-EGFP encode residue 167 as Lysine (K) instead of arginine (R), but this does not affect the specificity as identical sequences are recognised in Trd C from CC30-1.

**S. SauCL-EGFP "Expected" sequence**

MSNTQKKNVPELRFPGFEGEWEEKKVGELLEFKNGLNKGKEYFGSGSSIVNFKDVFNNRSINTNNL  
TGKVVNSKELKNYSVEKGDVFFTRTSEVIGEIGYPSVILNDPENTVFSGFVLRGRPKSGIDLINN  
NFKRYVFFTNFSFRKEMITKSSMTTRALTSGTAINRMKVIYPVSAKEQKKIGDFFSKLDRQIELEEQ  
KLELLQQQKKGYMQKIFSQELRFKDENGNDYPNWRTEIENILENIVDNRGKTPDNAPSEKYPLLE  
VNALGYRPAIYKVSFVSENTYNNWFREHLKENDILFSTVGNTGIVSLMDNYKAVIAQNIVGLRV  
NNNNLPSFIYYMLS YKGNQKKIKRIQMGA VQPSVKVSQFKFIKYLVP I KDEQEKVAKLLIEIDKLV  
NKQLIKIELLQQRKALLKSMFIGSMVSKGEELFTGVVPILVELDGDVNGHKFSVSGEGEGDATYG  
KLTLKFICTTGKLPVPWPTLVTTLTLYGVQCFSRYPDHMKQHDFFKSAMPEGYVQERTIFFKDDGNY  
KTRAEVKFEQDTLVNRIELKGIDFKEDGNILGHKLEYNYNSHNVYIMADKQKNGIKVNFKIRHNIE  
DGSVQLADHYQQNTPIGDGPVLLPDNHYLSTQSALS KDPNEKRDH MVLL E FVTAAGITLGMDELYK  
HHHHHH

**S. SauCL-EGFP "Actual" sequence**

MSNTQKKNVPELRFPGFEGEWEEKKVGELLEFKNGLNKGKEYFGSGSSIVNFKDVFNNRSINTNNL  
TGKVVNSKELKNYSVEKGDVFFTRTSEVIGEIGYPSVILNDPENTVFSGFVLRGRPKSGIDLINN  
NFKRYVFFTNFSFRKEMITKSSMTTRALTSGTAINKMKVIYPVSAKEQKKIGDFFSKLDRQIELEEQ  
KLELLQQQKKGYMQKIFSQELRFKDENGNDYPNWRTEIENILENIVDNRGKTPDNAPSEKYPLLE  
VNALGYRPAIYKVSFVSENTYNNWFREHLKENDILFSTVGNTGIVSLMDNYKAVIAQNIVGLRV  
NNNNLPSFIYYMLS YKGNQKKIKRIQMGA VQPSVKVSQFKFIKYLVP I KDEQEKVAKLLIEIDKLV  
NKQLIKIELLQQRKALLKSMFIGSMVSKGEELFTGVVPILVELDGDVNGHKFSVSGEGEGDATYG  
KLTLKFICTTGKLPVPWPTLVTTLTLYGVQCFSRYPDHMKQHDFFKSAMPEGYVQERTIFFKDDGNY  
KTRAEVKFEQDTLVNRIELKGIDFKEDGNILGHKLEYNYNSHNVYIMADKQKNGIKVNFKIRHNIE  
DGSVQLADHYQQNTPIGDGPVLLPDNHYLSTQSALS KDPNEKRDH MVLL E FVTAAGITLGMDELYK  
HHHHHH

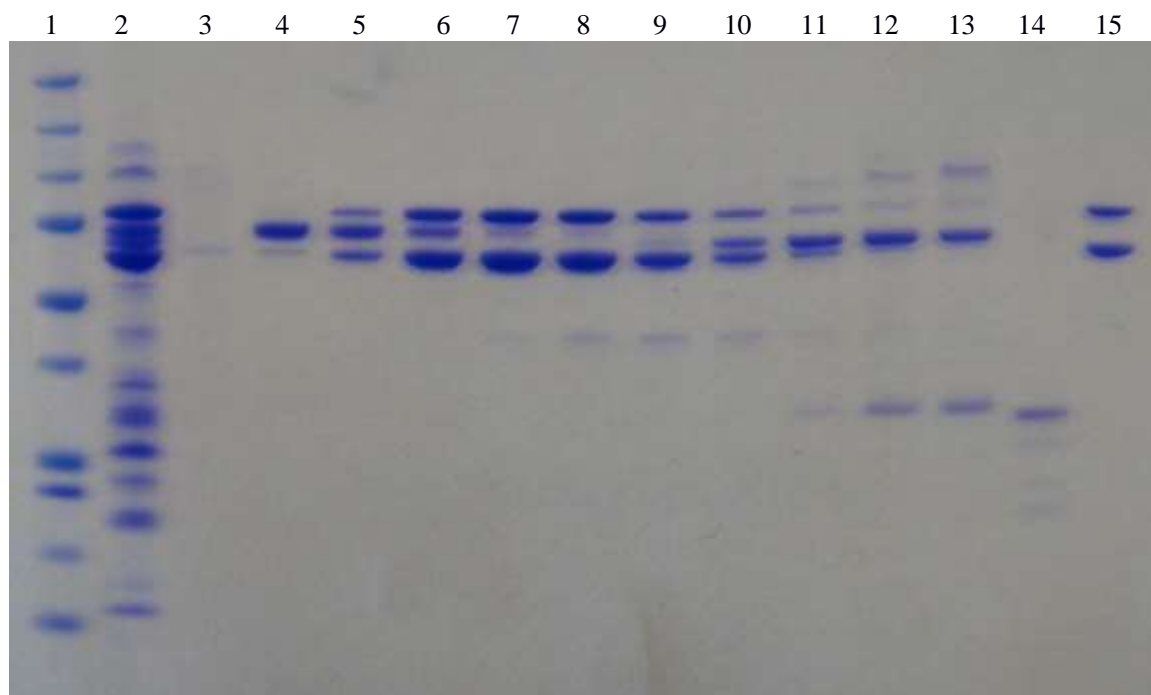

1- marker 2- Nickel column eluate 3-14 Fractions from gel filtration column  
15- CC5-1 purified protein marker

**S. SauCL-EGFP**

**CC45-1 GWAG-6-TAAA**

DNA cleavage assay.

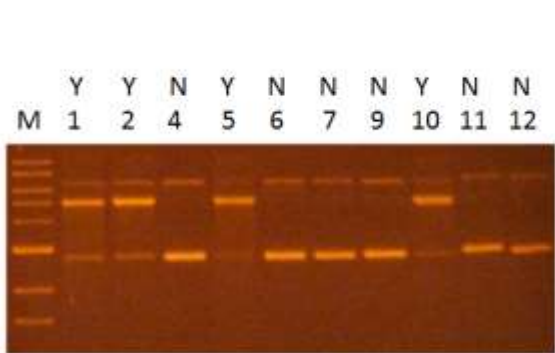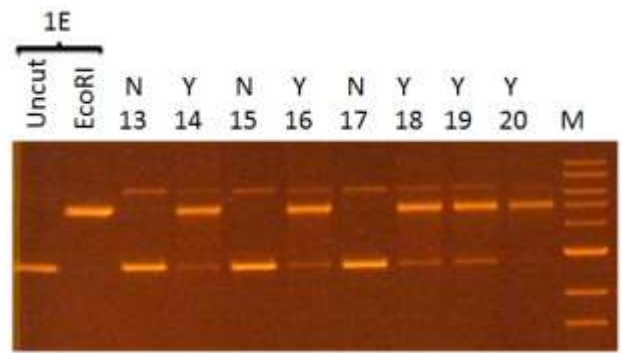

**S. SauOE**

**CC15**

**Recombinant S. SauOE**

**CC15-1**

**CAAC-5-RTGA**

MSNTQKKNVPELRFPGFEGEWEEKLGEVGTFTSSGGTPLKSKSEYWNGDIPWITTTGDIHNIKRENI  
TNFITEKGLNESSAKLITNEAILIAMYGQGKTRGMSAILNFEATTNQACAIYQTNQNINVFVFQYFQ  
KLYEFLRSLSNESQKNLSLSLLKEITLNYPNQEQQKIGDFFSKLDRQIELEEOKLELLQQQKKG  
YMQKIFSQELRFKDENGKDYPEWEETTIKEIAQINTGKKDTKDAITNGSYDFYVRSPIVYKINTFS  
YEGEAILTVGDGVGVGKVFHYVNGKFDYHQRVYKISDFKNYYGLLLFYFYSQNFLKETKKYSAKTS  
VDSVRKDMIANMKVPRPIYIEQKKIGQFIKRVDNKT~~TKIQKQV~~IELLKQRKKSLLQKMFIPGGSHHH  
HHH

**Wild Type S. SauOE**

MSNKQKKNVPELRFPGFEGEWEEKLGEVGTFTSSGGTPLKSKSEYWNGDIPWITTTGDIHNIKRENI  
TNFITEKGLNESSAKLITNEAILIAMYGQGKTRGMSAILNFEATTNQACAIYQTNQNINVFVFQYFQ  
KLYEFLRSLSNESQKNLSLSLLKEITLNYPNQEQQKIGDFFSKLDRQIELEEOKLELLQQQKKG  
YMQKIFSQELRFKDENGNDYPEWEETTIKEIAQINXGKKDTKDAITNGSYDFYVRSPIVYKINTFS  
YEGEAILTVGDGVGVGKVFHYVNGKFDYHQRVYKISDFKNYYGLLLFYFYSQNFLKETKKYSAKTS  
VDSVRKDMIANMKVPRPIYIEQKKIGQFIKRVDNKT~~TKIQKQV~~IELLKQRKKALLQKMF I

1 2 3 4 5 6 7 8 9

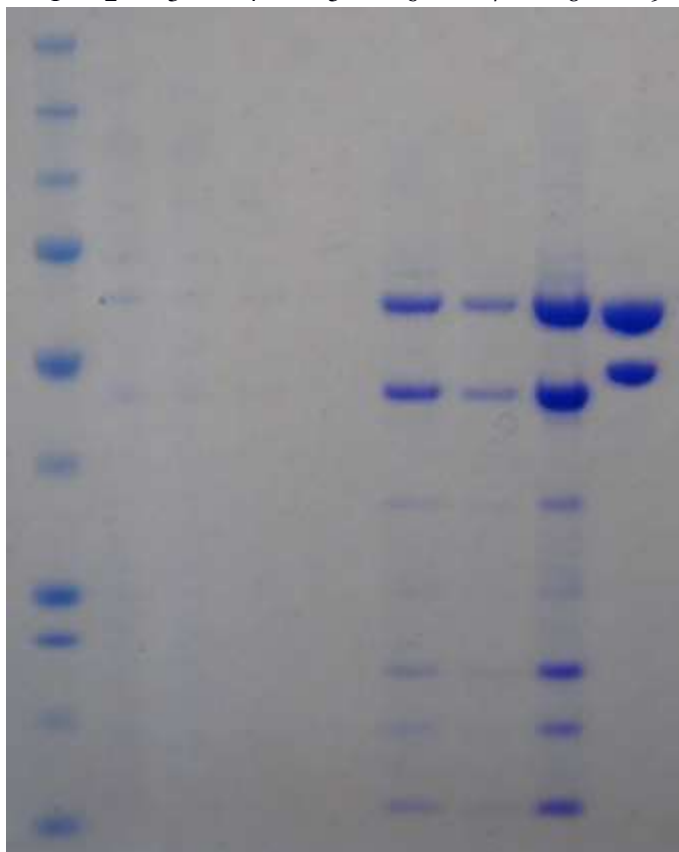

1- marker 2- soluble cell extract 3- Nickel column flow through  
4- Nickel column wash 1 5- Nickel column wash 2 6- Nickel column eluate  
7- eluate after PD10 desalting 8- Final concentrated protein  
9- CC398-1 purified protein marker

Although purified, this MTase was only used in SMRT sequencing.

S. SauOE

CC15

Recombinant S. SauOE

CC15-1

CAAC-5-RTGA

Motifs

| Motif         | Modified Position | Modification Type | % Motifs Detected | # Of Motifs Detected | # Of Motifs In Genome | Mean Modification QV | Mean Motif Coverage | Partner Motif |
|---------------|-------------------|-------------------|-------------------|----------------------|-----------------------|----------------------|---------------------|---------------|
| TCAYNNNNNGTTG | 3                 | m6A               | 96.67             | 261                  | 270                   | 63.4                 | 38.3                | CAACNNNNRRTGA |
| CAACNNNNRRTGA | 3                 | m6A               | 92.22             | 249                  | 270                   | 57.7                 | 36.1                | TCAYNNNNNGTTG |
| TCAGNDNNNGTTG | 3                 | m6A               | 23.86             | 47                   | 197                   | 48.5                 | 38.3                | CAACNNNHCTGA  |
| CAACNNNHCTGA  | 3                 | m6A               | 17.77             | 35                   | 197                   | 49.9                 | 38.6                | TCAGNDNNNGTTG |
| CCAHKNNNNGTTG | 3                 | m6A               | 16.93             | 32                   | 189                   | 50.6                 | 40.4                |               |
| CAACNNNHRTGG  | 3                 | m6A               | 16.28             | 35                   | 215                   | 45.3                 | 38.2                |               |
| Not Clustered | 0                 |                   | 0.02              | 2201                 | 9115988               | 34.9                 | 47.5                |               |

Modification QV Histogram By Motif

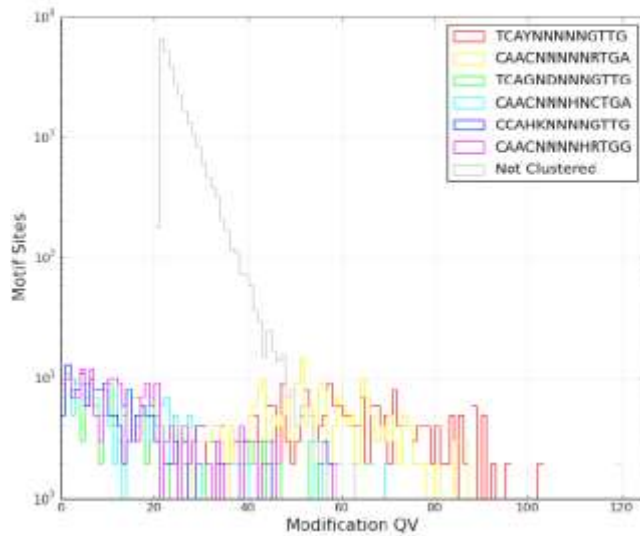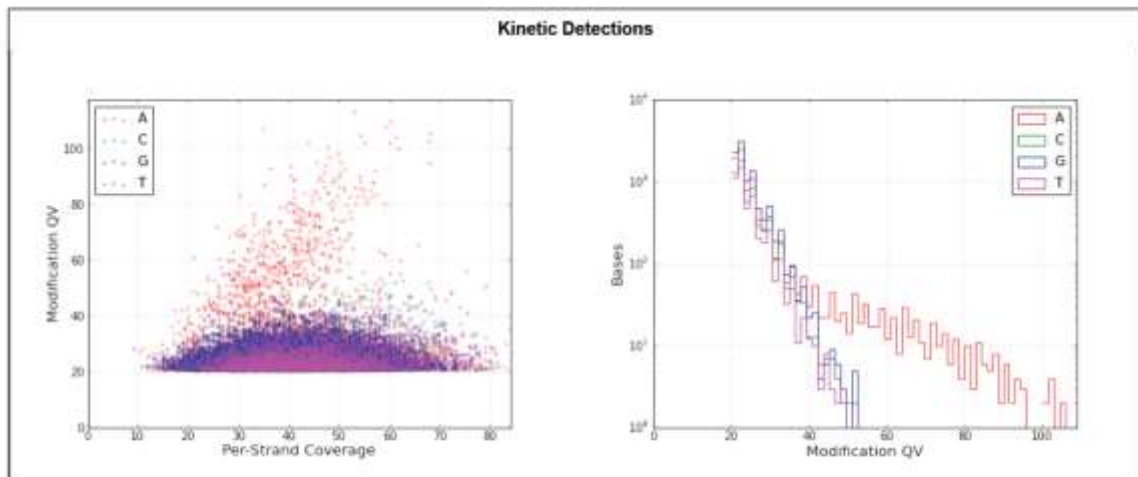

Motifs

| Motif         | Modified Position | Modification Type | % Motifs Detected | # Of Motifs Detected | # Of Motifs In Genome | Mean Modification QV | Mean Motif Coverage | Partner Motif |
|---------------|-------------------|-------------------|-------------------|----------------------|-----------------------|----------------------|---------------------|---------------|
| TCAYNNNNNGTTG | 3                 | m6A               | 96.67             | 261                  | 270                   | 63.4                 | 38.3                | CAACNNNNRRTGA |
| CAACNNNNRRTGA | 3                 | m6A               | 92.22             | 249                  | 270                   | 57.7                 | 36.1                | TCAYNNNNNGTTG |
| TCAGNDNNNGTTG | 3                 | m6A               | 23.86             | 47                   | 197                   | 48.5                 | 38.3                | CAACNNNHCTGA  |
| CAACNNNHCTGA  | 3                 | m6A               | 17.77             | 35                   | 197                   | 49.9                 | 38.6                | TCAGNDNNNGTTG |
| CCAHKNNNNGTTG | 3                 | m6A               | 16.93             | 32                   | 189                   | 50.6                 | 40.4                |               |
| CAACNNNHRTGG  | 3                 | m6A               | 16.28             | 35                   | 215                   | 45.3                 | 38.2                |               |
| Not Clustered | 0                 |                   | 0.02              | 2201                 | 9115988               | 34.9                 | 47.5                |               |

## S. SauJQ

### CC59

This enzyme was purified and analysed using the ATPase assay as both TRD specificities were known and the DNA cleavage assay showed cutting of all plasmids.

### Recombinant S. SauJQ CC59-1 GGA-6-RTGT

MSNTQKKNVPELRFPGFEGEWEEKLGDLIKVNSGKDYKHLEKGDIPVYGTGGYMTSVSEPLSEID  
AVGIGRKGKTINKPYLLEAPFWTVDTLIFYCTPKKETDILFILSLFRKINWKVYDESTGVPSLSKQTI  
NKINRFVPSNKEQQKIGEFFIKLDRQIELEEQKLELLQQQKKGVMQKIFSQELRFKDENGEDYSEW  
EERRFADIFKFHNKLRKPIKENLRVKGSYPYYGATGIIDYVDDFIFDGNLYLLIGEDGANIITRSAP  
LVYLVNGKFWVNNHAHILSPLNGNIQYLYQVAELVNYEKYNTGTAQPKLNIQNLKIINVVISTNLE  
EQQKIGSFLSKLDRQIDLEEQKLELLQQRKKALLKSMFVPGGSHHHHHH

### Wild type S. SauJQ

MSNTQKKNVPELRFPEFEGEWEEERKLGDLIKVNSGKDYKHLDKGDIPVYGTGGYMTSVSEPLSEID  
AVGIGRKGKTINKPYLLEAPFWTVDTLIFYCTPEKEADILFILSLFRKINWKLYDESTGVPSLSKQTI  
NKINRLVPTNKEQQKIGEFFSKLDRQIELEEQKLELLQQQKKGVMQKIFSQELRFKDENGEDYSEW  
EERRFADIFKFHNKLRKPIKENLRVKGSYPYYGATGIIDYVDDFIFDGNLYLLIGEDGANIITRSAP  
LVYLVNGKFWVNNHAHILSPLNGNIQYLYQVAELVNYEKYNTGTAQPKLNIQNLKIINVVISTNLE  
EQQKIGSFLSKLDRQIDLEEQKLELLQQRKKALLKSMFV\*

1 2 3 4 5 6 7 8 9

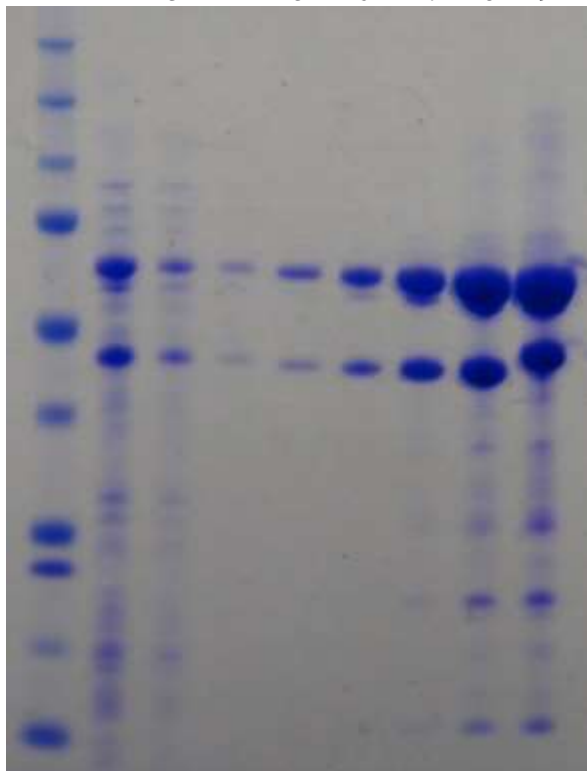

1- marker 2- soluble cell extract 3- Nickel column flow through  
4- Nickel column wash 1 5- Nickel column wash 2 6- Nickel column eluate  
7- eluate after conc. and PD10 desalting  
8- final concentrated protein 9- XE purified protein marker

S. SauJQ

CC59

Recombinant S. SauJQ

CC59-1

GGA-6-RTGT

ATPase assay shows that N=6.

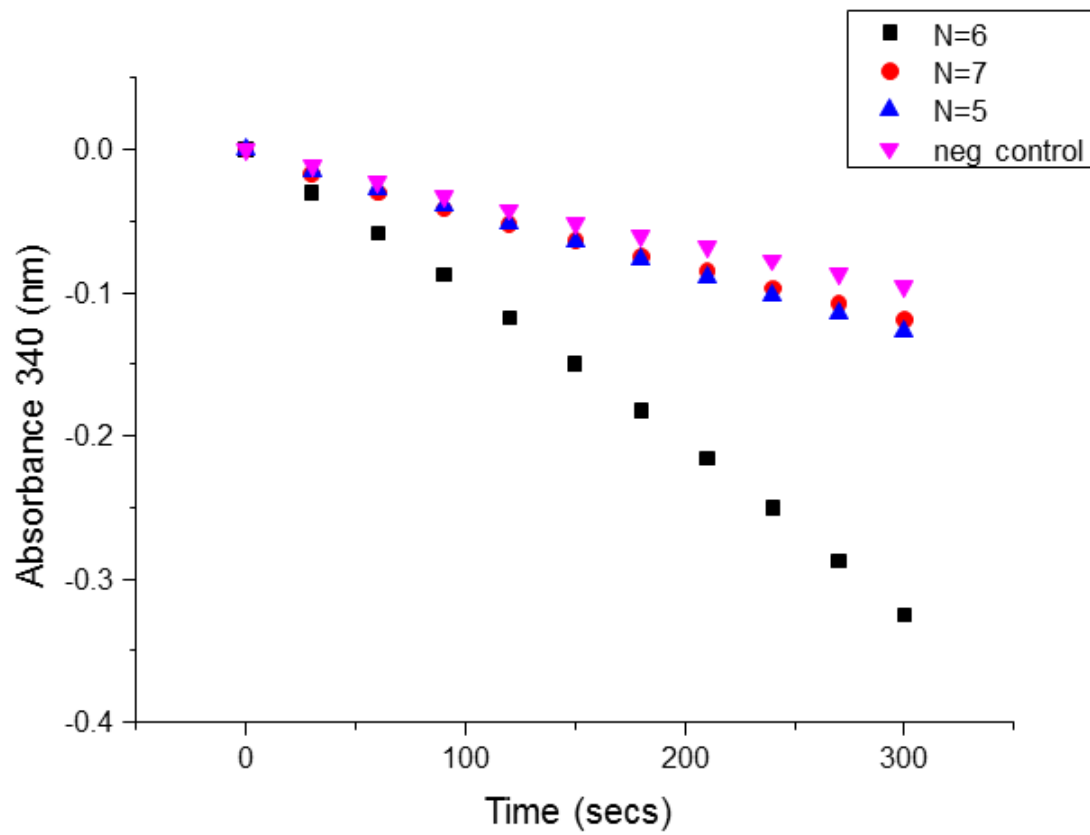

| Oligonucleotide name | DNA sequence (5' to 3')                          |
|----------------------|--------------------------------------------------|
| JQ5for               | AGATGATGTCATCAATGCGGATTACAGTGTGCCCTATACGATATAA   |
| JQ5rev               | TTATATCGTATAGGGCACACTGTAATCCGCATTGATGACATCATCT   |
| JQ6for               | AGATGATGTCATCAATGCGGATTGACAGTGTGCCCTATACGATATAA  |
| JQ6rev               | TTATATCGTATAGGGCACACTGTCAATCCGCATTGATGACATCATCT  |
| JQ7for               | AGATGATGTCATCAATGCGGATTAGACAGTGTGCCCTATACGATATAA |
| JQ7rev               | TTATATCGTATAGGGCACACTGTCTAATCCGCATTGATGACATCATCT |



## S. SauRQ

### CC72

This enzyme was purified and analysed using the ATPase assay as both TRD specificities were known and the DNA cleavage assay showed cutting of all plasmids.

### Recombinant S. SauRQ CC72-1 GARA-6-RTGT

MSNTQKKNVPELRFPGFEGEWEEKLG~~EVAKIYDGTHQTPKYTNEG~~IKFLSVENIKTLNSSKYISE  
EAFEKEFKIRPEFGDILMTRIGDIGTPNIVSSNEKFAYYVSLALLKTKNLNSYFLKNLILSSSIQN  
ELWRKTLHVAFPKKINKNEIGKIKINYPKKQEQQKIGQFFSKLDRQIELEEQQLELLQQQKKG~~YMQ~~  
KIFSQELRFKDENGEDYSEWEERRFADIFKFHNKLRKPIKENLRVKGSYPYYGATGIIDYVDDFIF  
DGNYLIGEDGANIITRSAPLVYLVNGKFWVNNHAHILSPLNGNIQYLYQVAELVNYEKYNTGTAQ  
PKLNIQNLKIINVVISTNLEEQQKIGSFLSKLDRQIDLEEQQLELLQQRKKALLKSMFVPGGSHHH  
HHH

### Wild type S. SauRQ

MSNTQKKNVPELRFPGFEGEWEEKLG~~EVAKIYDGTHQTPKYTNEG~~IKFLSVENIKTLNSSKYISE  
EAFEKEFKIRPEFGDILMTRIGDIGTPNIVSSNEKFAYYVSLALLKTKNLNSYFLKNLILSSSIQN  
ELWRKTLHVAFPKKINKNEIGKIKINYPKKQEQQKIGQFFSKLDRQIELEEQQLELLQQQKKG~~YMQ~~  
KIFSQELRFKDENGNDYPEWEERRFADIFKFHNKLRKPIKENLRVKGSYPYYGATGIIDYVDDFIF  
DGNYLIGEDGANIITRSAPLVYLVNGKFWVNNHAHILSPLNGNIQYLYQVAELVNYEKYNTGTAQ  
PKLNIQNLKIISV~~V~~ISTNLEEQQKIGSFLSKLDRQIDLEEQQLELLQQRKKALLKSMFV\*

1 2 3 4 5 6 7 8 9

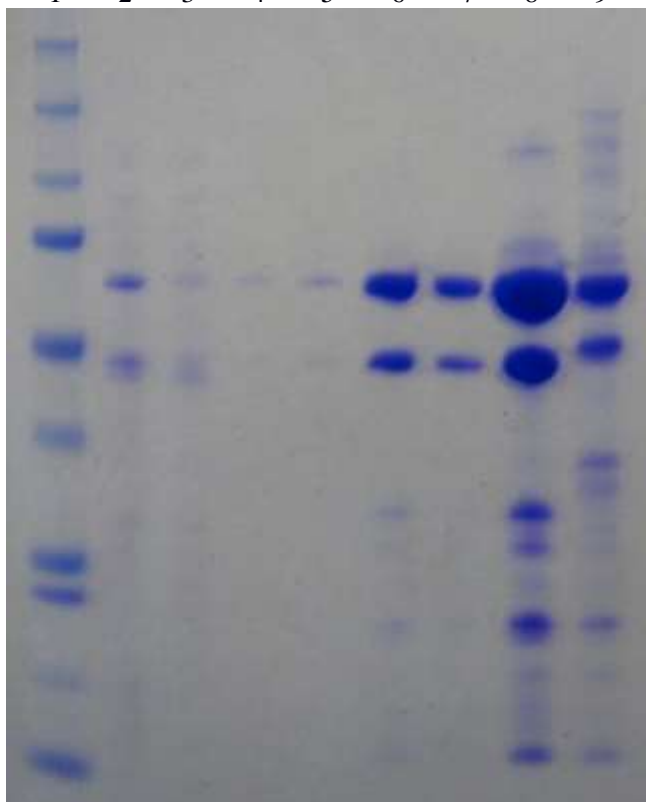

1- marker 2- soluble cell extract 3- Nickel column flow through  
4- Nickel column wash 1 5- Nickel column wash 2 6- Nickel column eluate  
7- eluate after PD10 desalting 8- Final protein after concentration  
9- NP purified protein as marker

S. SauRQ

CC72

Recombinant S. SauRQ

GARA-6-RTGT

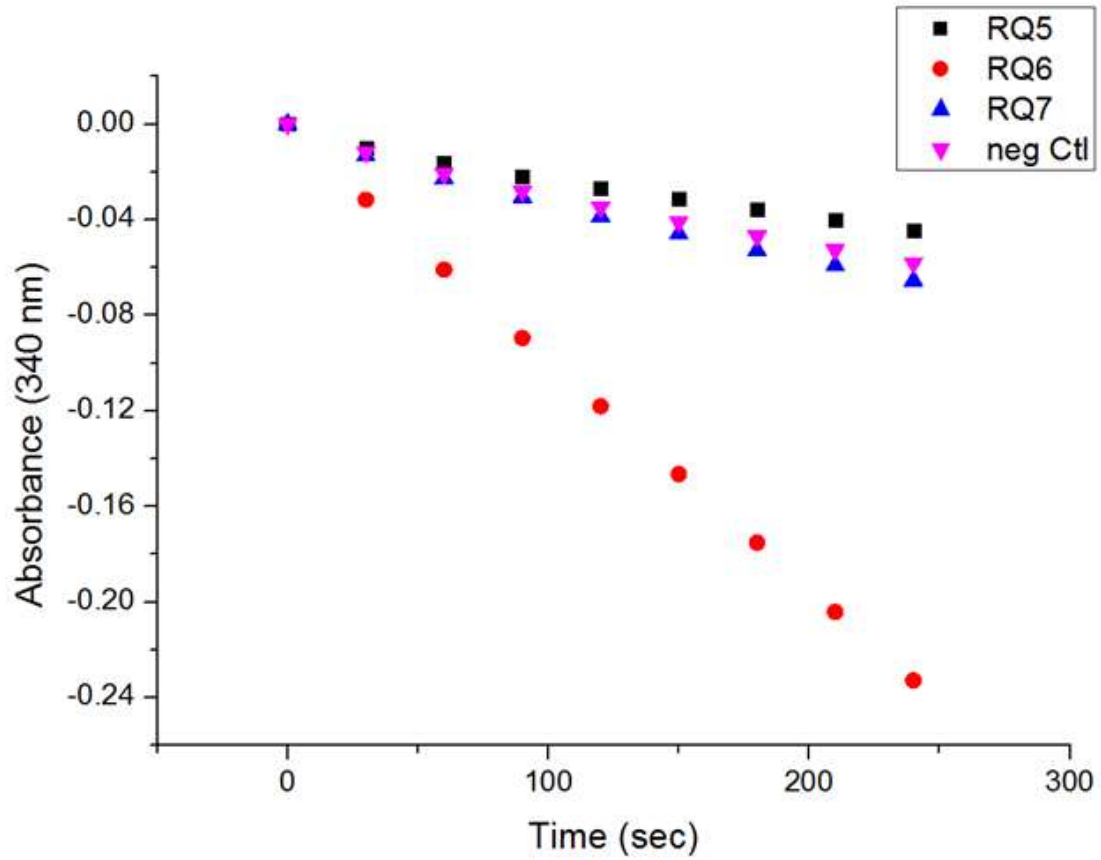

N=6 shows activity.

| Oligonucleotide name | DNA sequence (5' to 3')                           |
|----------------------|---------------------------------------------------|
| RQ5for               | AGATGATGGAATCAATGCGAGATTCCAGTGTGCCCTATACGATATAA   |
| RQ5rev               | TTATATCGTATAGGGCACACTGGAATCTCGCATTGATTCCATCATCT   |
| RQ6for               | AGATGATGGAATCAATGCGAGATGTCCAGTGTGCCCTATACGATATAA  |
| RQ6rev               | TTATATCGTATAGGGCACACTGGACATCTCGCATTGATTCCATCATCT  |
| RQ7for               | AGATGATGGAATCAATGCGAGATGTACCAGTGTGCCCTATACGATATAA |
| RQ7rev               | TTATATCGTATAGGGCACACTGGTACATCTCGCATTGATTCCATCATCT |

## S.SauJS

This second enzyme from CC72 was purified and analysed using the ATPase assay. There are minor variations between S subunit sequences in CC72-2.

### CC72

#### Recombinant S.SauJS

#### CC72-2

#### GGA-7-TGC

MSNTQKKNVPELRFPGFEGEWEEKKLGDLIKVNSGKDYKHLEKGDIPVYGTGGYMTSVSEPLSEID  
AVGIGRKGKTINKPYLLEAPFWTVDTLIFYCTPKKETDILFILSLFRKINWKVYDESTGVPSLSKQTI  
NKINRFVPSNKEQQKIGEFFIKLDRQIELEEQKLELLQQQKKGYMOKIFSQELRFKDENGNDYPDW  
TNERLGEVTTVTMGQSPKSVNYTDNSNDTVLIQGNADIENGLINPRIYTREVTKLIQKDEIILT  
VAPVGKLAMAQINACIGRGVCSIKGDKFLYYFLEWFATQNKWIRFSQGSTFESISGNDIRNIHIKIP  
VEDERTKIIKLLNSLDVLSKTDLKIQNLKQRKQSLQKIFVPGGSHHHHHH

#### Wild Type S.SauJS

MSNTQKKNVPELRFPEFEGEWEEKQLGNI IKVNSGKDYKHLDKGDIPVYGTGGYMTSVSEPLSEID  
AVGIGRKGKTINKPYLLEAPFWTVDTLIFYCTPKKETDILFILSLFRKINWKVYDESTGVPSLSKQTI  
NKINRFVPTNKEQQKIGKFFSKLDRQIELEEQKLELLQQQKKGYMOKIFSQELRFKDENGNDYPDW  
TNERLGEVTTVTMGQSPKSVNYTDNSNDTVLIQGNADIENGLINPRIYTREVTKLIQKDEIILT  
VAPVGKLAMAQINACIGRGVCSIKGDKFLYYFLEWFATQNKWIRFSQGSTFESISGNDIRNIHIKIP  
VEDERTKIIKLLNSLDVLSKTDLKIQNLKQRKQSLQKIFV

1 2 3 4 5 6 7 8 9

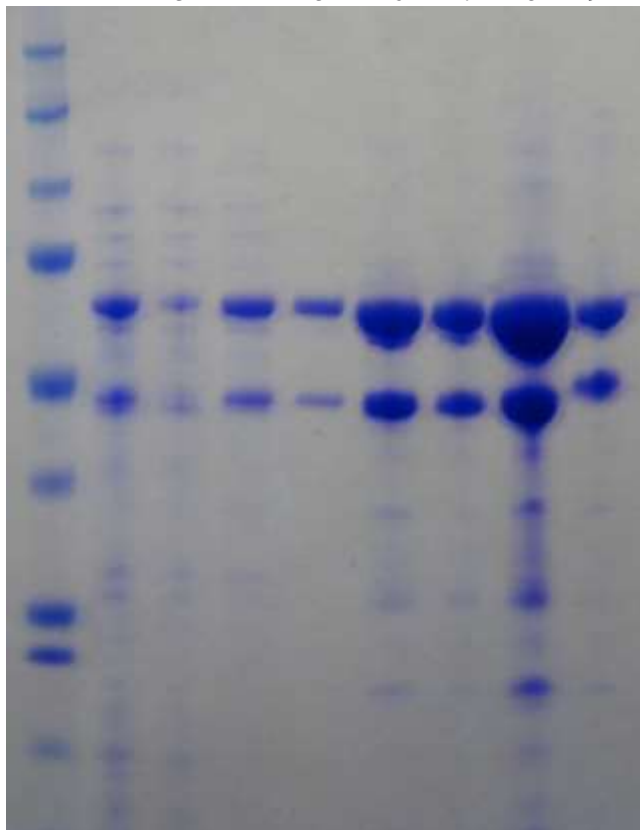

1- marker 2- soluble cell extract 3- Nickel column flow through  
4- Nickel column wash 1 5- Nickel column wash 2 6- Nickel column eluate  
7- eluate after PD10 desalting 8- final protein after concentration  
9- NP purified protein as marker

S.SauJS

CC72

Recombinant S.SauJS

CC72-2

GGA-7-TGC

N=7 shows activity.

| Oligonucleotide name | DNA sequence (5' to 3')                         |
|----------------------|-------------------------------------------------|
| JS6for               | AGATGATGGCATCAATGCGGATTACATTGCGCCCTATACGATATAA  |
| JS6rev               | TTATATCGTATAGGGCGCAATGTAATCCGCATTGATGCCATCATCT  |
| JS7for               | AGATGATGGCATCAATGCGGATTGACATTGCGCCCTATACGATATAA |
| JS7rev               | TTATATCGTATAGGGCGCAATGTCAATCCGCATTGATGCCATCATCT |

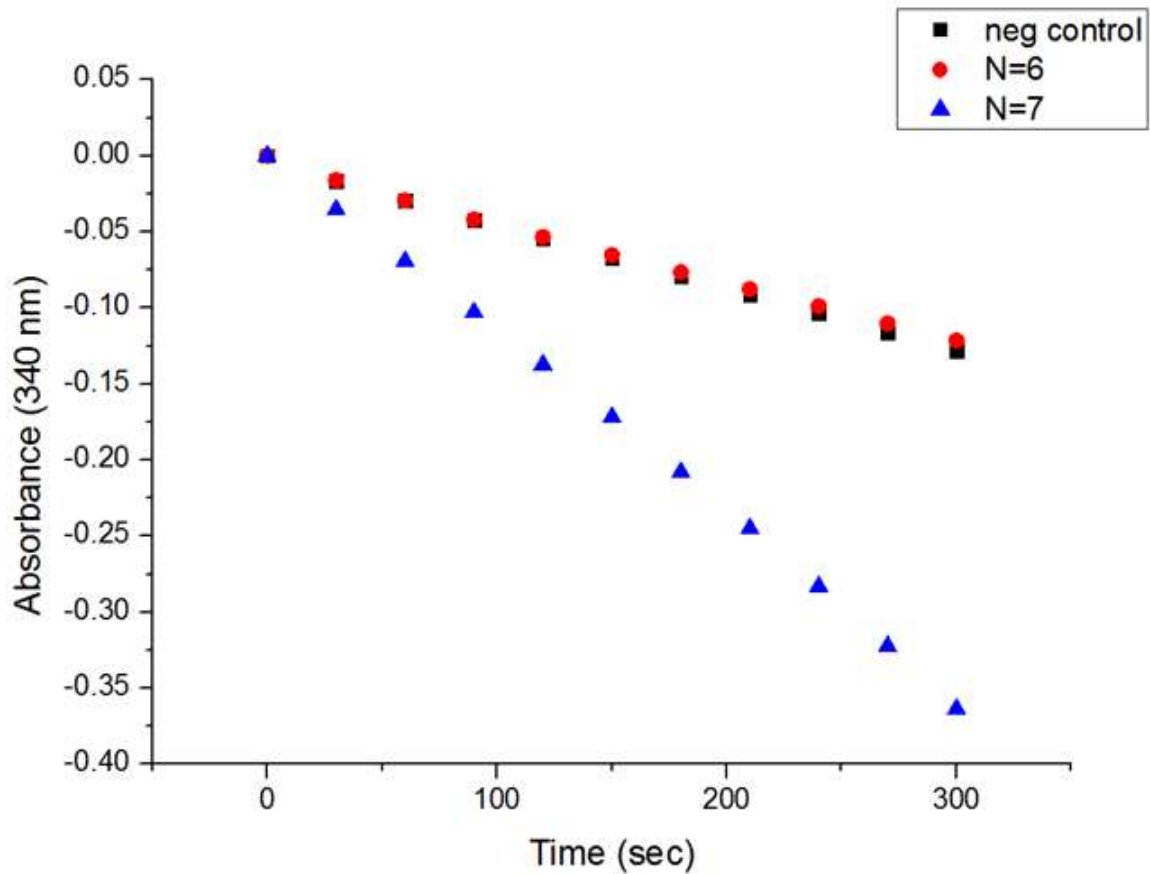

**S. SauTU**

**CC75**

**Recombinant S. SauTU**

**CC75-1**

**CAAG-5-RTC**

MSNTQKKNVPELRFPGFEGEWEEKELGEIFQIISGSTPLKSNKEFYENGNINWVKTTDLNNSKVTH  
SKEKITEYAMKSLKLLVPKNSVLIAMYGGFNQIGRTGLLKIDATINQAISALLMNHETNPEFIQA  
FLNYQVKGWKRYAASSRKDPNITKKDIEQFKVPYVSINEQQKIGEFFSKIDHQIELEEOKLELLQO  
QKKGYMQKIFSQELRFKDENGEDYPDWEVTTIQNITKYTSSKKSSNQYADKDNSKGYPVYDAVQEI  
GKDSNYDIEESYISILKDGAGVGRNLNLRPGKSSVIGTMGYIQSNNVDIEFLYRKMVVDFKKYIIG  
STIPHLYFKDYSKETLYIPSSIQEQAKIGMFISNLDKLIENKNLKLNLCLKQLKQGLLQSMFIPGGS  
HHHHH

**Wild type S. SauTU**

MSNTQTKNVPELRFPGFEGEWEEKELGEIFQIISGSTPLKSNKEFYENGNINWVKTTDLNNSKVTH  
SKEKITEYAMKSLKLLVPKNSVLIAMYGGFNQIGRTGLLKIDATINQAISALLMNHETNPEFIQA  
FLNYQVKGWKRYAASSRKDPNITKKDIEQFKVPYVSINEQQKIGEFFSKIDHQIELEEOKLELLQO  
QKKGYMQKIFSQELRFKDENGEDYPDWEVTTIQNITKYTSSKKSSNQYADKDNSKGYPVYDAVQEI  
GKDSNYDIEESYISILKDGAGVGRNLNLRPGKSSVIGTMGYIQSNNVDIEFLYRKMVVDFKKYIIG  
STIPHLYFKDYSKETLYIPSSIQEQAKIGMFISNLDKLIENKNLKLNLCLKQLKQGLLQSMFI

1 2 3 4 5 6 7 8

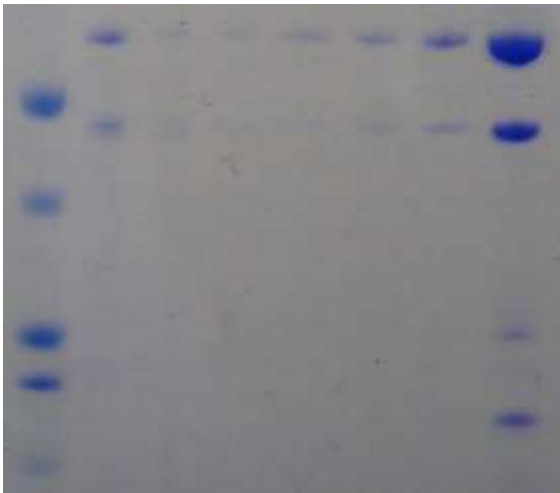

1- marker 2- soluble cell extract 3- Nickel column flow through 4- Nickel column wash 1 5- Nickel column wash 2 6- Nickel column eluate 7- eluate after conc. and PD10 desalting 8- final protein after concentration

DNA cleavage assay.

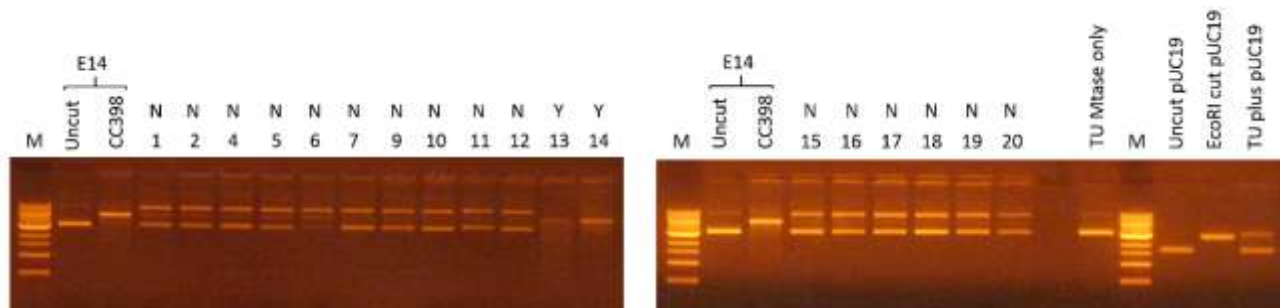

**S. SauVW**

**CC75**

**Recombinant S. SauVW CC75-2 CNGA-7-TTYG**

MSNTQKKNVPELRFPGFEGEWEEKELRELRNPKDKYSYTGPFSGSDLKKS DYTTDGIQIIQLQNI  
DGYFYNSNKVFTSNEKAEVLKSCNVFPGDIVIAK MADPIARAAI VPDNNIGKYL MASDGIRLSVDT  
VHFNTK FVLECI NRK SFRKKVEDNSSGSTRMRIGLSTLGSLTLKTTTLKEQQKIGQFFSKLDRQIE  
LEEQKLELLQQQKGYMQKIFSQELRFKDENGNDY PDWEEKQLGELSQIVRGASPRPIKDPKWFNK  
ESDIGWLRISDVTNQNNGKIYHLEQKLSIEGQEKTRVLVTTHLLLSIAASIGK PVMNFVKTGVHDGF  
LIFLKP KFNLF FMYYWLEYFKDKWSKYGQPGSQVNLNSEIVKSQTLNMP SNHEQEKVGQFFNRNEK  
LIELQQEKIMYIKRCKQVLLQKMFIPGGSHHHHH

**Wild Type S. SauVW**

MSNTGKMNPELRFPGFEGEWEEKELRELRNPKDKYSYTGPFSGSDLKKS DYTTDGIQIIQLQNI  
DGYFYNSNKVFTSNEKAEVLKSCNVFPGDIVIAK MADPIARAAI VPDNNIGKYL MASDGIRLSVDT  
VHFNTK FVLECI NRK SFRKKVEDNSSGSTRMRIGLSTLGSLTLKTTTLKEQQKIGQFFSKLDRQIV  
LEEQKLELLQQQKGYMQKIFSQELRFKDENGNDY PDWEEKQLGELSQIVRGASPRPIKDPKWFNK  
ESDIGWLRISDVTNQNNGKIYHLEQKLSIEGQEKTRVLVTTHLLLSIAASIGK PVMNFVKTGVHDGF  
LIFLKP KFNLF FMYYWLEYFKDKWSKYGQPGSQVNLNSEIVKSQTLNMP SNHEQEKVGQFFNRNEK  
LIELQQEKIMYIKRCKQVLLQKMF I \*

**Reports for Job Dryden\_V\_W\_MODs**

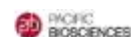

SMRT Cells: 1 Movies: 1

| Motif Summary  |                   |         |                   |                      |                       |                      |                     |               |
|----------------|-------------------|---------|-------------------|----------------------|-----------------------|----------------------|---------------------|---------------|
| Motifs         | Modified Position | Type    | % Motifs Detected | # Of Motifs Detected | # Of Motifs In Genome | Mean Modification QV | Mean Motif Coverage | Partner Motif |
| CNGANNNNNTTYG  | 4                 | m6A     | 99.93%            | 1442                 | 1443                  | 97.87                | 66.11               | CRAANNNNNTCNG |
| CRAANNNNNTCNG  | 4                 | m6A     | 99.86%            | 1441                 | 1443                  | 89.76                | 63.95               | CNGANNNNNTTYG |
| DNNNNNGCCACNCA | 9                 | unknown | 19.1%             | 72                   | 377                   | 38.56                | 67.49               |               |

S. SauVW

CC75

Recombinant S. SauVW

CC75-2

CNGA-7-TTYG

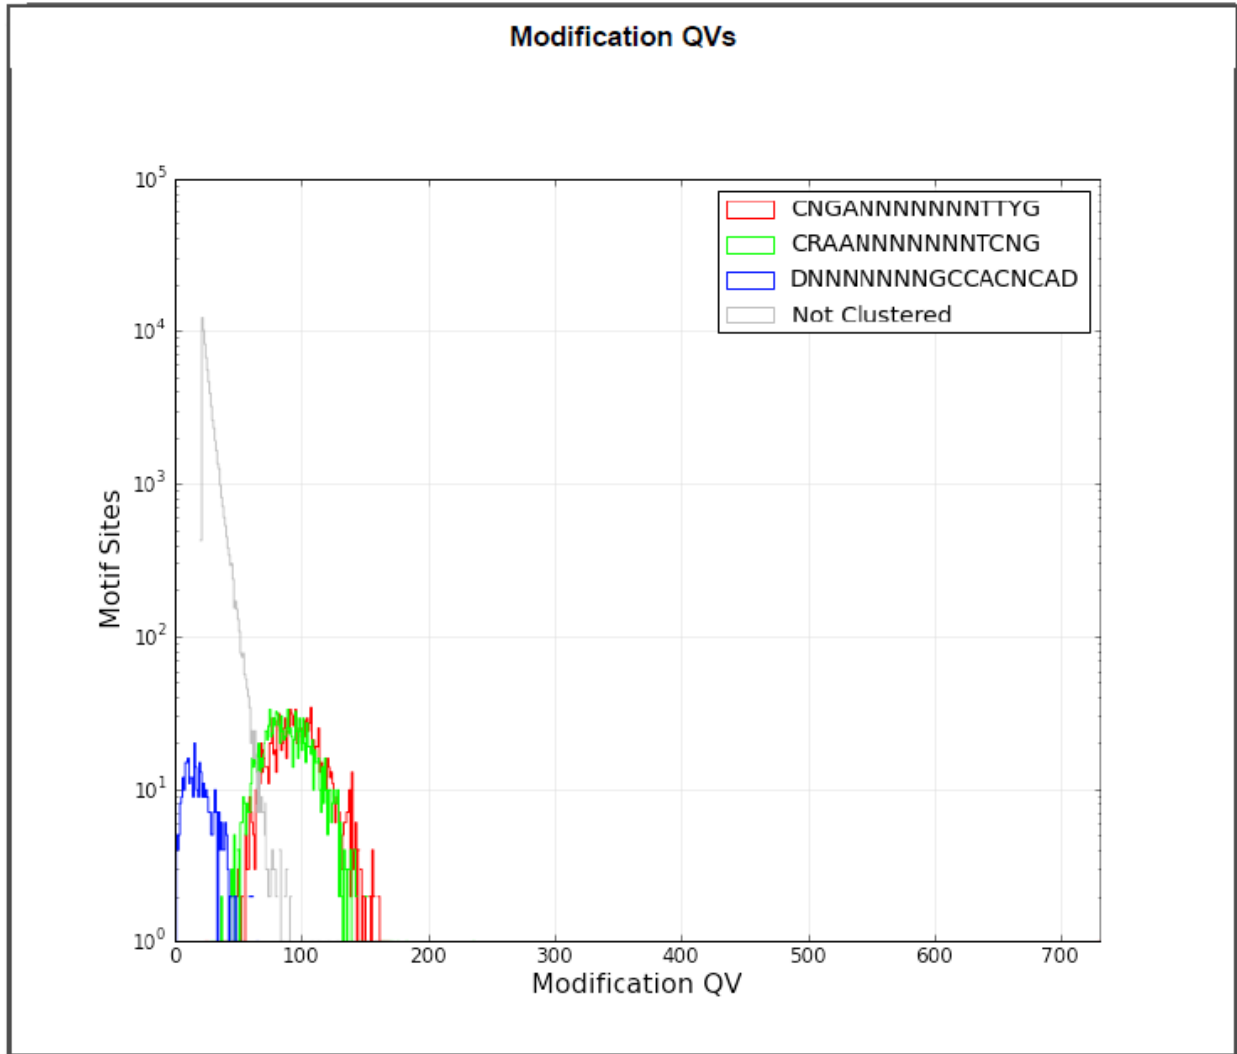

**S. SauZW**

**CC80**

**Recombinant S. SauZW                      CC80-2                      GAC-6-TTYG**

MSNTQKKNVPELRFPGFEGEYSLDIFGNLATNKSEKFNPQENENASIDIELDCIEQNTGRLIKIYNS  
KEFSSQKNKFNPNQNVLYGKLRPYLNKYYFTKKS~~G~~VCSSEI~~W~~VLKSTKEDKLLNLF~~L~~YFIQTKRYS  
DVASKSAGSKMPRADWGLIENIRVYFPELCEQQKIGQFFSKLDRQIELEEOKLELLQQQKKGYMOK  
IFSQELRFKDENGNDYPDWEEKQLGELSQIVRGASPRPIKDPKWFN~~K~~ESDIGWLRISDVTNQN~~G~~KI  
YHLEQKLSIEGQEKTRVLVTTHLLLSIAASIGKPV~~M~~NFVKTGVHDGFLIFLNPKFNLF~~F~~MYWLEY  
FKDKWSKYGQPGSQVNLNSEIVKSQTLNMPNHEQE~~K~~VGQFFNRNEKLIELQQEKIMYIKRCKQVL  
LQKMFIPGGSHHHHHH

**Wild Type S. SauZW**

MSNTQTKNVPELRFPGFEGEYSLDIFGNLATNKSEKFNPQENENASIDIELDCIEQNTGRLIKIYNS  
KEFSSQKNKFNPNQNVLYGKLRPYLNKYYFTKKS~~G~~VCSSEI~~W~~VLKSTKEDKLLNLF~~L~~YFIQTKRYS  
DVASKSAGSKMPRADWGLIENIRVYFPELCEQQKIGQFFSKLDRQIELEEOKLELLQQQKKGYMOK  
IFSQELRFKDENGNDYPDWEEKQLGELSQIVRGASPRPIKDPKWFN~~K~~ESDIGWLRISDVTNQN~~G~~KI  
YHLEQKLSIEGQEKTRVLVTTHLLLSIAASIGKPV~~M~~NFVKTGVHDGFLIFLNPKFNLF~~F~~MYWLEY  
FKDKWSKYGQPGSQVNLNTEIVKSQTLNMPNHEQE~~K~~VGQFFNRNEKLIELQQEKIMYLKRRKQVL  
LQKMF~~I~~\*

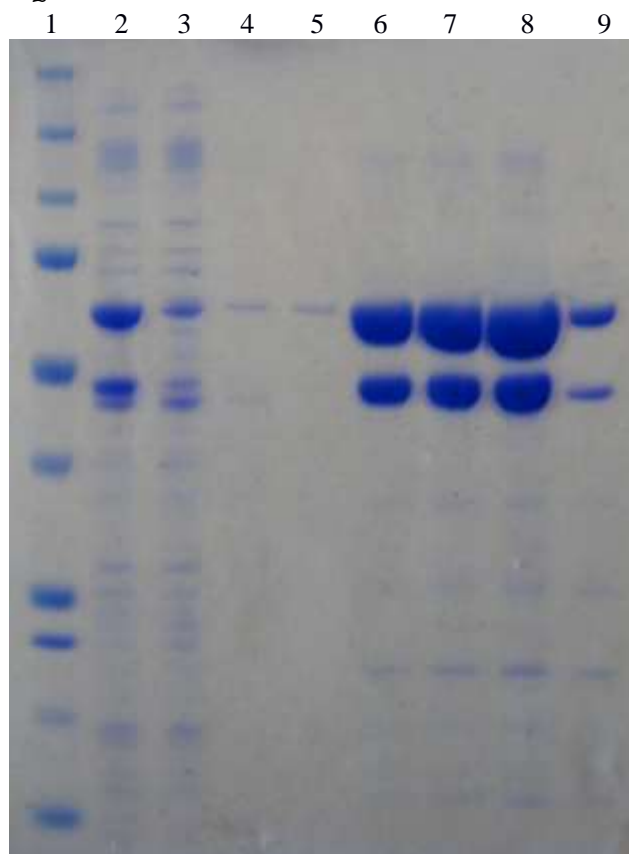

1- marker    2- soluble cell extract    3- Nickel column flow through  
4- Nickel column wash 1    5- Nickel column wash 2    6- Nickel column eluate  
7- eluate after conc. and PD10 desalting  
8- final protein after concentration    9- CC75-1 purified protein marker

Although purified, this enzyme cut all plasmids in the DNA cleavage assay so the ATPase assay was used as we knew the specificities of the TRDs.



S. SauZW

CC80

Recombinant S. SauZW

CC80-2

GAC-6-TTYG

N=6 shows activity.

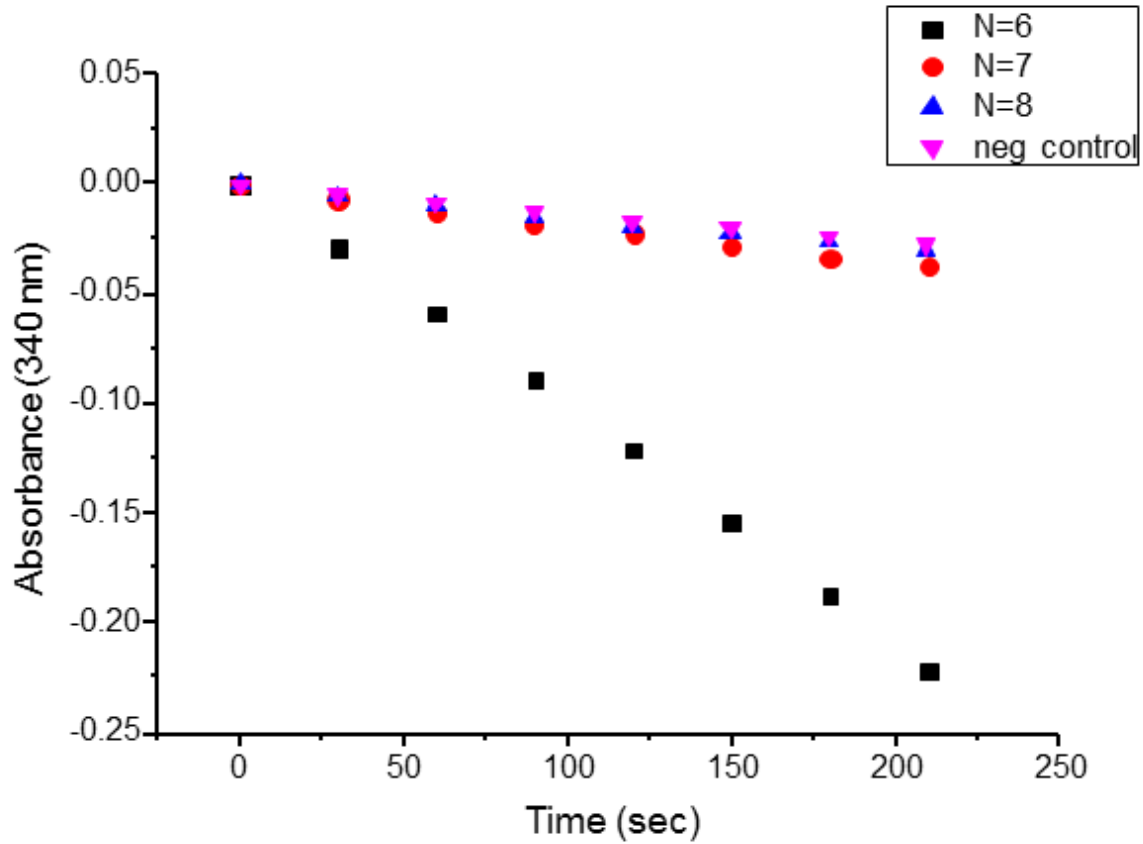

| Oligonucleotide name | DNA sequence (5' to 3')                            |
|----------------------|----------------------------------------------------|
| ZW6for               | AGATGATGGAATCAATGCGACTTCCATTTTCGGCCCTATACGATATAA   |
| ZW6rev               | TTATATCGTATAGGGCCGAAATGGAAGTCGCATTGATTCCATCATCT    |
| ZW7for               | AGATGATGGAATCAATGCGACTTCTCATTTTCGGCCCTATACGATATAA  |
| ZW7rev               | TTATATCGTATAGGGCCGAAATGAGAAGTCGCATTGATTCCATCATCT   |
| ZW8for               | AGATGATGGAATCAATGCGACTTCTACATTTTCGGCCCTATACGATATAA |
| ZW8rev               | TTATATCGTATAGGGCCGAAATGTAGAAGTCGCATTGATTCCATCATCT  |

**S. SauXf\***

**ST80**

**Recombinant S. SauXf\***

**CC80-3**

**TCTA-6-RTTC**

MSNTQKKNVPELRFPGFEGEWEEKQFADF<sup>T</sup>TKINQGLQIAINERKTEYSPELYFYITNEFLRPNSQT  
KYFIENPPQSVIANKEDILMTRTGNTGKVVTNVFGAFHNNFFKIKFDKNLYDRFLFLVEVLNSSKIQ  
NKILSLAGSSTIPDLNHSDFYSSISSYPLLREQQKIGKFFSKLDRQIELEEOKLELLQQQKGYMQ  
KIFSQELRFKDENGEDYPDWKEKKLGDITEQSMYGIGASATRFDSKNIYIRITDIDEKSRKLNQYQ  
LTPDELNNKYKLRNDILFARTGASTGKSYIHKEEKDIYNYFAGFLIKFKINEQNSPLFIYQFT  
LTSKFNKVVKMSVRSQPGINSEYAKLPLVLPNKLEQQKIAKFLDRFDRQIELEKQKIEILQQQ  
KKGLLQSMFI PGGSHHHHH

**Wild Type S. SauXf\***

MSNTQKKNVPELRFPEFEGEWEEKQFADF<sup>T</sup>TKINQGLQIAINERKTEYSPELYFYITNEFLRPNSQT  
KYFIENPPQSVIANKEDILMTRTGNTGKVVTNVFGAFHNNFFKIKFDKNLYDRFLFLVEVLNSSKIQ  
NKILSLAGSSTIPDLNHSDFYSSISSYPLLREQQKIGKFFSKLDRQIELEEOKLELLQQQKGYMQ  
KIFSQELRFKDENGEDYPDWKEKKLGDITEQSMYGIGASATRFDSKNIYIRITDIDEKSRKLNQYQ  
LTPDELNNKYKLRNDILFARTGASTGKSYIHKEEKDIYNYFAGFLIKFKINEQNSPLFIYQFT  
LTSKFNKVVKMSVRSQPGINSEYAKLPLVLPNKLEQQKIAKFLDRFDRQIELEKQKIEILQQQ  
KKGLLQSMFI

**Reports for Job Dryden\_X\_zeta\_MODs**

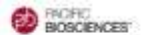

SMRT Cells: 1 Movies: 1

| Motif Summary |                   |      |                   |                      |                       |                      |                     |               |
|---------------|-------------------|------|-------------------|----------------------|-----------------------|----------------------|---------------------|---------------|
| Motifs        | Modified Position | Type | % Motifs Detected | # Of Motifs Detected | # Of Motifs In Genome | Mean Modification QV | Mean Motif Coverage | Partner Motif |
| TCTANNNNNRRTC | 4                 | m6A  | 100.0%            | 92                   | 92                    | 96.27                | 61.85               | GAAYNNNNNTAGA |
| GAAYNNNNNTAGA | 3                 | m6A  | 100.0%            | 92                   | 92                    | 90.82                | 60.21               | TCTANNNNNRRTC |

**Modification QVs**

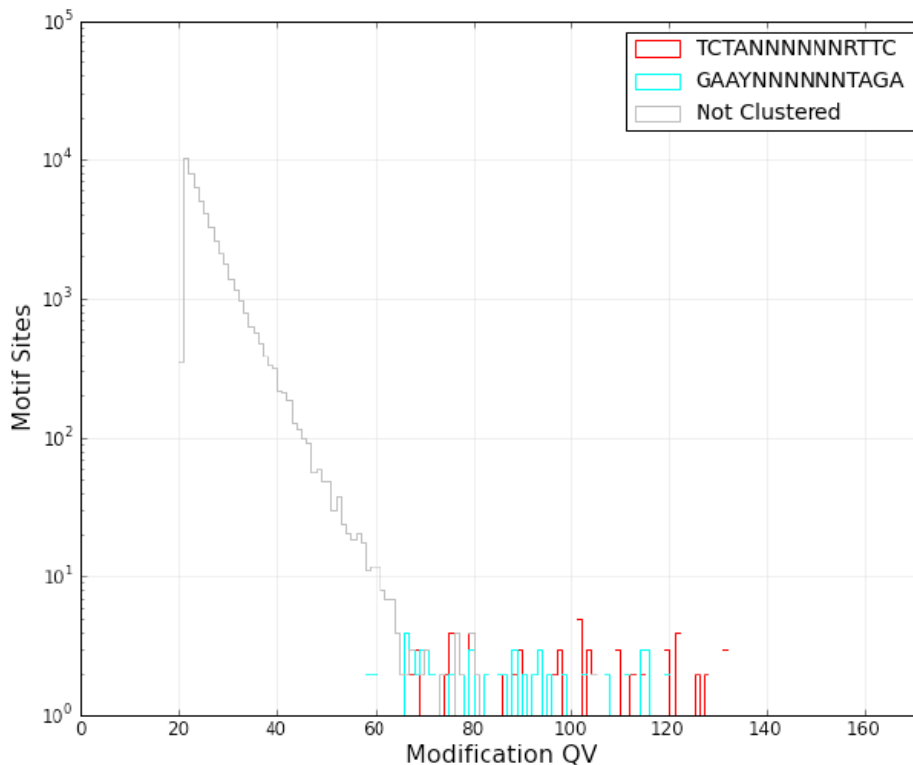

**S. Saue\*D**

**CC873**

**Recombinant S. Saue\*D**

**CC873-1**

**GAG-6-GAT**

MSNTQKKNVPELRFPGFEGEWEEKSISSFLKESKIKGSHAKKLTVKLWGKGVVPKKE<sup>T</sup>FKGSD  
NTQYYKRKAGQLMYGKLDLFLNCAFGIVPDSLNNYESTIDSPSFD<sup>F</sup>INGDSKFLLE<sup>R</sup>IKLKSFYK<sup>F</sup>  
GDIANGSRKAKRINQDTFLSLPVFAPKYDEQLRIGEFFSKLDRQIELEEQKLELLQQQKKG<sup>Y</sup>MQKI  
FSQELRFKDENSEDYPHWENSKIEKYLKERNERSDKGQMLSVTINSGIIKFSELDRKDNSSK<sup>D</sup>KS<sup>N</sup>  
YKVVRKNDIAYNSMRMWQGASGRSNYNGIVSPAYTVLYPTQNTSSLFIGYKFK<sup>T</sup>HRMIHK<sup>F</sup>KINS<sup>Q</sup>  
GLTSDTWNLKYKQLKNINIDIPVLEEQEKIGDFFKKMDILISKQIKIEILEKEKQSFLQKMFL<sup>P</sup>  
GSHHHHHH

**Wild Type S. Saue\*D**

MSNTQKKNVPELRFPGFEGEWEEKSISSFLKESKIKGSHAKKLTVKLWGKGVVPKKE<sup>T</sup>FKGSD  
NTQYYKRKAGQLMYGKLDLFLNCAFGIVPDSLNNYESTIDSPSFD<sup>F</sup>INGDSKFLLE<sup>R</sup>IKLKSFYK<sup>F</sup>  
GDIANGSRKAKRINQDTFLSLPVFAPKYDEQLRIGEFFSKLDRQIELQKQKLELLQQQKKG<sup>Y</sup>MQKI  
FSQELRFKDENGEDYPHWENSKIEKYLKERNERSDKGQMLSVTINSGIIKFSELDRKDNSSK<sup>N</sup>K<sup>S</sup>  
YKVVRKNDIAYNSMRMWQGASGKS<sup>N</sup>YNGIVSPAYTVLYPTQNTSSLFIGYKFK<sup>T</sup>HRMIHK<sup>F</sup>KINS<sup>Q</sup>  
GLTSDTWNLKYKQLKNINIDIPVLEEQEKIGDFFKKMDILISKQIKIEILEKEKQSFLQKMFL<sup>\*</sup>

1 2 3 4 5 6 7 8 9

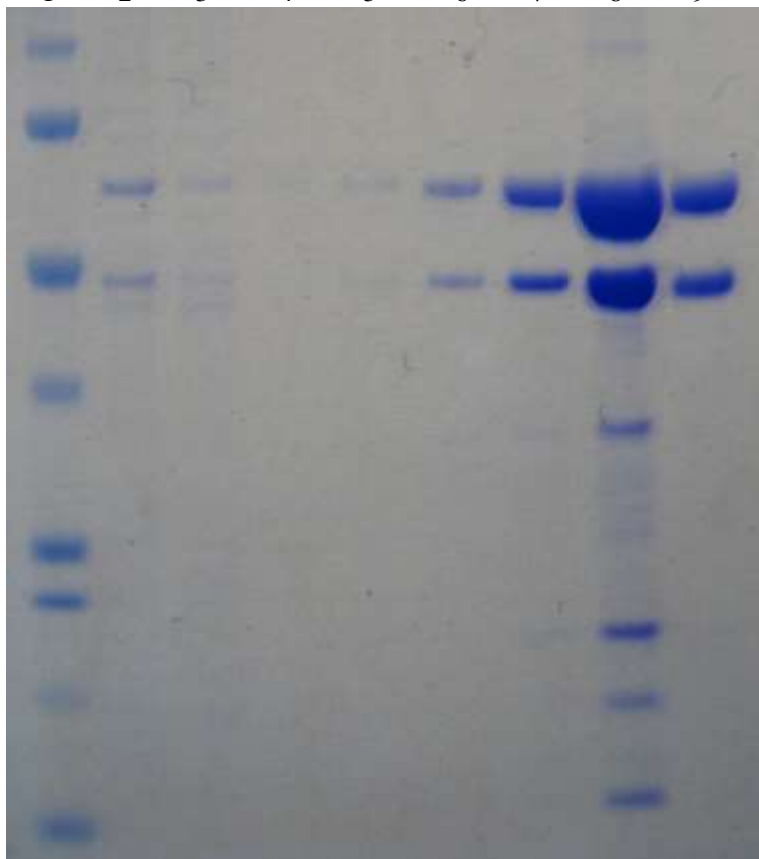

1- marker 2- soluble cell extract 3- Nickel column flow through  
4- Nickel column wash 1 5- Nickel column wash 2 6- Nickel column eluate  
7- eluate after PD10 desalting and concentration  
8- Final concentrated protein 9- CC398-1 purified protein marker

S. Saue\*D

CC873-1

Recombinant S. Saue\*D

GAG-6-GAT

e\*D clearly digests pUC19 so the ATPase assay was used as we knew the specificities of both TRDs.

Likely site: GAG-N<sub>x</sub>-GAT

GAG-4-GAT 2 sites in pUC19

GAG-5-GAT 0 sites in pUC19

GAG-6-GAT 2 sites in pUC19

GAG-7-GAT 0 sites in pUC19

| Oligonucleotide name | DNA sequence (5' to 3')                         |
|----------------------|-------------------------------------------------|
| e*D6for              | AGATGATGGAATCAATGCGAGTTCATGATGCCCTATACGATATAA   |
| e*D6rev              | TTATATCGTATAGGGCATCATGGAACCTCGCATTGATTCCATCATCT |
| e*D5for              | AGATGATGGAATCAATGCGAGTTCAGATGCCCTATACGATATAA    |
| e*D5rev              | TTATATCGTATAGGGCATCTGGAACCTCGCATTGATTCCATCATCT  |
| e*D4for              | AGATGATGGAATCAATGCGAGTTCAGATGCCCTATACGATATAA    |
| e*D4rev              | TTATATCGTATAGGGCATCTGAACTCGCATTGATTCCATCATCT    |

N=6 shows activity.

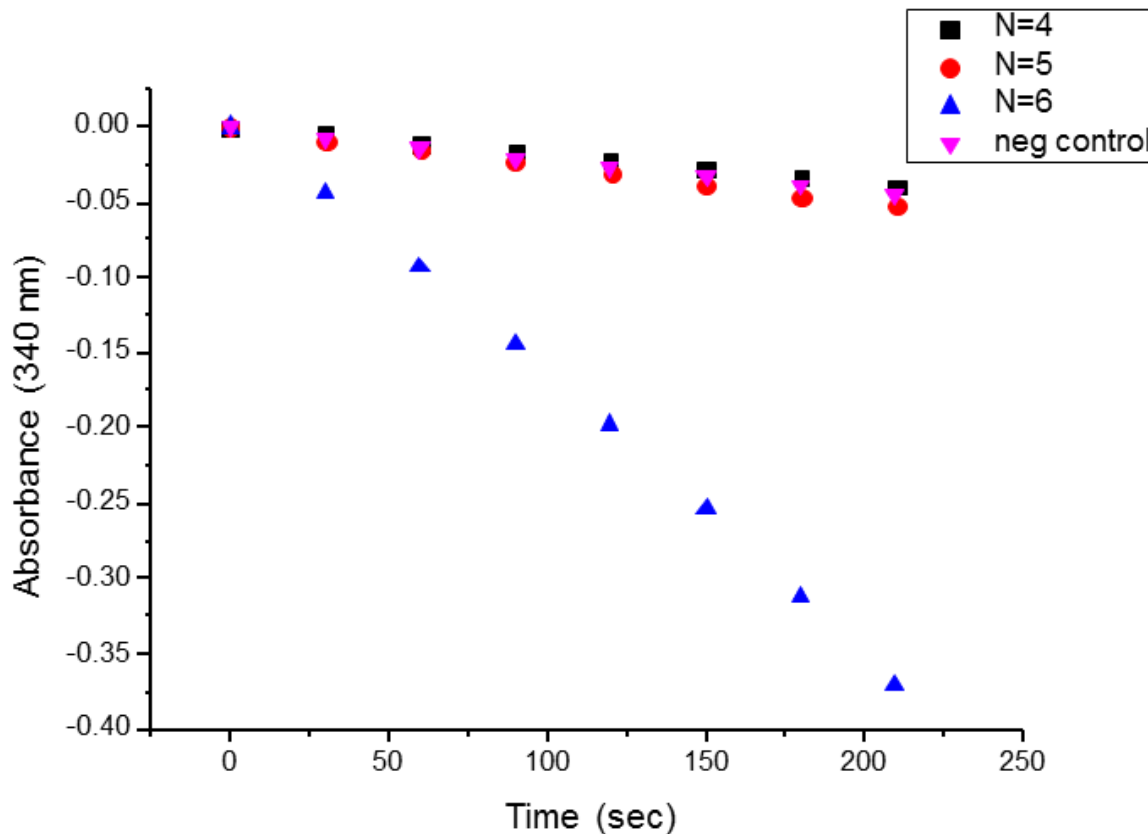

SMRT results for S. aureus strains LGA251 and NCTC13435

LGA251

SMRT® Portal Print

Reports for Job Dryden\_LGA\_Mods PACIFIC BIOSCIENCES™

SMRT Cells: 2    Movies: 2

| Motif Summary |                   |         |                   |                      |                       |                      |                     |               |
|---------------|-------------------|---------|-------------------|----------------------|-----------------------|----------------------|---------------------|---------------|
| Motifs        | Modified Position | Type    | % Motifs Detected | # Of Motifs Detected | # Of Motifs In Genome | Mean Modification QV | Mean Motif Coverage | Partner Motif |
| TCAYNNNNCTWC  | 3                 | m6A     | 100.0%            | 391                  | 391                   | 352.92               | 251.20              | GWAGNNNNRTGA  |
| GWAGNNNNRTGA  | 3                 | m6A     | 100.0%            | 391                  | 391                   | 349.86               | 243.53              | TCAYNNNNCTWC  |
| GTANNNNCTTC   | 3                 | m6A     | 99.59%            | 245                  | 246                   | 349.71               | 251.31              | GAAGNNNNNTAC  |
| GAAGNNNNNTAC  | 3                 | m6A     | 99.59%            | 245                  | 246                   | 349.91               | 237.85              | GTANNNNCTTC   |
| BTTGGTAVY     | 2                 | unknown | 26.29%            | 127                  | 483                   | 38.52                | 249.23              |               |

NCTC13435

SMRT® Portal Print    Close

Reports for Job Dryden\_NTCT\_Mods PACIFIC BIOSCIENCES™

SMRT Cells: 2    Movies: 2

| Motif Summary   |                   |      |                   |                      |                       |                      |                     |                |
|-----------------|-------------------|------|-------------------|----------------------|-----------------------|----------------------|---------------------|----------------|
| Motifs          | Modified Position | Type | % Motifs Detected | # Of Motifs Detected | # Of Motifs In Genome | Mean Modification QV | Mean Motif Coverage | Partner Motif  |
| CRAANNNNNGTC    | 4                 | m6A  | 100.0%            | 422                  | 422                   | 275.90               | 212.58              | GACNNNNNTTYG   |
| GACNNNNNTTYG    | 2                 | m6A  | 100.0%            | 422                  | 422                   | 315.18               | 220.50              | CRAANNNNNGTC   |
| GAAYNNNNNTAGA   | 3                 | m6A  | 100.0%            | 260                  | 260                   | 307.05               | 214.54              | TCTANNNNNR TTC |
| TCTANNNNNR TTC  | 4                 | m6A  | 100.0%            | 260                  | 260                   | 318.07               | 218.98              | GAAYNNNNNTAGA  |
| GGATG           | 3                 | m6A  | 100.0%            | 2818                 | 2818                  | 327.54               | 220.52              | CATCC          |
| CATCC           | 2                 | m6A  | 100.0%            | 2818                 | 2818                  | 324.65               | 220.07              | GGATG          |
| DNNNNNNASNGGATG | 9                 | m6A  | 26.07%            | 67                   | 257                   | 141.42               | 225.84              |                |

SUPPLEMENTARY INFORMATION FOR TABLES 5 AND 6.

SUPPLEMENTARY INFORMATION FOR TABLES 5 AND 6.

By combining all TRD 1 with all TRD 2 amino acid sequences and searching sequence databases, we found that some of our "artificial hybrids" described in Table 3 were actually present in real strains of *S. aureus*. We present several examples below.

**S. SauAU**

A plasmid expressing S.SauAU with the M subunit was prepared but not analysed further. The S.SauAU sequence matches that of the S subunit of the Type I RM system in *S. schweitzeri* FSA084.

>S.SauAU

```
MSNTQKKNVPELRFPGFEGEWEEKKLGDLTTKIGSGKTPKGGSENYTNKGIPFLRSQNIRNGKLN  
NDLVYISKDIDDEMKNRSTYYGDVLLNITGASIGRTAINSIVEIHANLNQHVCIIRLKKEYYYNFF  
GQYLLSRKGRKIFLAQSGGSREGLNFKEIANLKIFTPTIFEEQQKIGEFISKLDRQIELEEQKLE  
LLQQQKKGVMQKIFSQELRFKDENGEDYPDWEVTTIQNITKYTSSKKSSNQYADKDNSKGYPVYDA  
VQEIGKDSNYDIEESYISILKDGAGVGRNLNLRPGKSSVIGTMGYIQSNNVDIEFLYYRMKVVD  
FKKIIGSTIPHLYFKDYSKETLYIPSSIQEQAKIGMFISNLDKLIENKNLKNLCLKQLKQGLLQSMFI  
PGGSHHHHHH
```

**S. schweitzeri FSA084**

CLUSTAL O(1.2.1) multiple sequence alignment

```
FSA084      msn-tqkkvpelrfpgfegeweekklgevttkigsgktpkggse  
S.SauAU     MSNTQKKNVPELRFPGFEGEWEEKKLGDLTTKIGSGKTPKGGSE  
***      *:*****:*****:*****:*****:*****  
  
FSA084      ngklnlndlvvyiskdiddemknsrtyygdvllnitgasigrtainsivethanlnqhvci  
S.SauAU     NGKLNLDLVYISKDIDDEMKNRSTYYGDVLLNITGASIGRTAINSIVEIHANLNQHVCII  
*****:*****:*****:*****:*****:*****  
  
FSA084      irlkkeyyydffeqyllsrkgkrkiflaqsggsreglnfkeianlkiftstifeeqqkv  
S.SauAU     IRLKKEYYYNFFGQYLLSRKGRKIFLAQSGGSREGLNFKEIANLKIFTPTIFEEQQKIG  
***** *****:*****:*****:*****:*****:  
  
FSA084      kffskldrqielleeqklellqqqkkgvmqkifsqelrfkdengneypewkvtsiqdvtky  
S.SauAU     EFISKLDRQIELEEQKLELLQQQKKGVMQKIFSQELRFKDENGEDYPDWEVTTIQNITKY  
:*.*****:*****:*****:*****:*****:*****:  
  
FSA084      tsskkssnqyadkidskgyppydavreigkdsnydieesyisilkdgagvgrlnlrpeks  
S.SauAU     TSSKKSSNQYADKDNSKGYPVYDAVQEIGKDSNYDIEESYISILKDGAGVGRNLNLRPGKS  
***** :*****:*****:*****:*****:***** **  
  
FSA084      svigtmgylqannidleflyyrmkivdfkkyiigstiphlyfkdyketlyipssiqeqa  
S.SauAU     SVIGTMGYIQSNNVDIEFLYYRMKVVDFKKIIGSTIPHLYFKDYSKETLYIPSSIQEQA  
*****:*.**.*:*****:*****:*****:*****:*****:  
  
FSA084      kigkfisnldkmiengktrklnclqklqgllqgmfi-----  
S.SauAU     KIGMFISNLDKLIENKNLKNLCLKQLKQGLLQSMFI  
*** *****:****. *****:*****:*****.***
```

**S.SauJE GGA-6-RTGA**

**S.SauJE against subspecies 21262, a member of ST49**

HsdS sequences from strain 21262.

>EH091218 This has TRD R + f\*

```
MSNTQKKNVPELRFPGFEGEWEEKLGEVAKIYDGTHQTPKYTNEGIFLSVENIKTLNS
SKYISEEAFEKEFKIRPEFGDILMTRIGDIGTPNIVSSNEKFAYYVSLALLKTKNLNSYF
LKNLILSSSIQNELWRKTLHVAFPKKINKNEIGKIKINYPKKQEQQKIGQFFSKLDRQIE
LEEQKLELLQQQKGYMQKIFSQELRFKDENGEDYPDWKEKGLDITEQSMYGIGASATR
FDSKNIYIRITDIDEKSRKLNYNLTPDELNNKYKLRNDILFARTGASTGKSYIHKEE
KDIYNYFAGFLIKFEIDEQNNPLFIYQFTLTSKFNKWKVMSVRSVSGQPGINSEYAKLP
LVLPNKLEQQKIAEFLDRFDQQIELEKQKIEILQQQKGLLQSMFI
```

>EH092010 This has TRD J + E

```
MSNTQKKNVPELRFPGFEGEWEEKLEDIKVNNSGKDYKHLDKGDI PVYGTGGYMTSVSE
PLSEIDAVGIGRGTINKPYLLEAPFVTVDTLFYCTPKKETDILFILSLFRKINWKVYDE
STGVPSLSKQTINKINRFVPTNKEQQKIGKFFSKLDRQIELEEQKIELLQQQKGYIQKI
FSQELRFKDENGDDYPEWEETTIQEIQAINTGKKDKDAITNGSYDFYVRSPIVYKINTF
SYEGEAILTVGDG VGVGVGFHYVNGKFDYHQRVYKISDFKNYYGLLLFYFYSQNFLKETK
KYSAKTSVDSVRKDMVANMKVPRPIYIEQEKIGQFIKKVDNKIKIQQVIELLKQRKKAL
LQKMF I
```

CLUSTAL O(1.2.1) multiple sequence alignment

```
EH091218      msntqkknvpelrfpgfegeweeklgevakiydgthqtpkytnegikflsveniktlns
S.SauJE       MSNTQKKNVPELRFPGFEGEWEEKLGDLIKVNNSGKDYKHL-----EKGDIPVYGT
EH092010      msntqkknvpelrfpgfegeweeklediikvnsgkdykhl-----dkgdipvygt
                ***** :: *: .*.. . . :* . :

EH091218      skyiseeafekefkirpefgdilmtrigdigtpnivssnekfayyvslallk--tknlns
S.SauJE       GGYMTSVS-----EPLSEIDAVGIGRGTINKPYLLEAP---FWTVDTLfyctpkketDI
EH092010      ggymtsvs-----eplseidavgigrkgtinkpylleap---fwtvdtlfyctpkketdi
                . *::: . : * : : * * * .* :::: : * . : .*:::

EH091218      yflknlilsssiqnelwrkthlvafppkkinkneigkikinyppkkqeqqkigqffskldrq
S.SauJE       LF-----ILSLFRKINWKVYDESTGVPSLSKQTINKINRFVPSNKEQQKIGEFFIKLDRQ
EH092010      lf-----ilslfrkinwkvydestgvpslskqtinkinrfvptnkeqqkigkffskldrq
                * : * ::: * : . : ..*: * **: *.:*****:* *****

EH091218      ieleeqklellqqqkgyMQKIFSQELRFKDENGEDYPDWKEKGLDITEQSMYGIGAS-
S.SauJE       IELEEQKLELLQQQKGYMQKIFSQELRFKDENGKDYPEWEETTIKEIAQINTGKKDKTD
EH092010      ieleeqkiellqqqkgyiqkifsqelrfkdengddypeweettiqeiaqintgkkdktd
                *****:*****:*****:*****:***:***:..: :. :.

EH091218      atrfdskniyiritdideksrklnynltpdelnnkyklrndilfartgastgksyih
S.SauJE       AITNGSYDFYVRSPIV-YK-----INTFSYEGEAILTVGDG VGVGVGFHY
EH092010      aitngsydfyvrspiv-yk-----intfsyegeailtvgdgvgvgkvhfy
                * * :::* : * *... : : ** . *...** : :

EH091218      keekdiynnyfagflikfeideqnnplfiyqftltskfnkvwkmsvrsqpgpinseeya
S.SauJE       VNGK--FDYHQRVYKIS-DFKNYYGLLLFYF--SQNFLKETKYSAKTSVDSVRKDMIA
EH092010      vngk--fdyhrvykis-dfknnygllyfyf--sqnflketkysaktsvdsvrkdmva
                : * ::* : * :.: *:* * ::* * .* *.:. .... *

EH091218      klplvlpnkleqqkiaefldrfdqqielekqkieilqqqkglqsmfi-----
S.SauJE       NMKVPRPIYIEQKIGQFIKRVNDNKTIQKQVIELLKQRKKSLLQKMFIPGGSHHHHHH
EH092010      nmkvprpiyieqekigqfikkvndnkikiqkviellqkrkallqkmi-----
                :: : * :**:*:*:..:..: ::* **:*:*:*:*.*.*.*
```

**The above alignment shows that SauJE is identical to the EH092010 sequence from this strain.**



**S.SauJE GGA-6-RTGA**  
**Sub species 21262, a member of ST49**

CLUSTAL O(1.2.1) multiple sequence alignment  
TRD R and TRD f\* against EHO91218, the second HsdS in this strain.

```
CC80-3 -----  
EHO91218 msntqkknvpelrfpgfegeweekklgevakiydgthqtpkytnegikflsveniktlns  
CC72-1 MSNTQKKNVPELRFPGFEGEWEEKKLGEVAKIYDGTHQTPKYTNEGIFLSVENIKTLNS
```

```
CC80-3 -----  
EHO91218 skyiseeafekefkirpefgdilmtrigdigtpnivssnekfayyvslallktnlnsyf  
CC72-1 SKYISEEAFEKEFKIRPEFGDILMTRIGDIGTPNIVSSNEKFAYYVSLALLKTKNLNSYF
```

```
CC80-3 -----  
EHO91218 lknlilsssiqnelwrkthlvafppkkinkneigkikinyppkkqeqqkigqffskldrqi  
CC72-1 LKNLILSSSIQNELWRKTHLVAFPPKKINKNEIGKIKINYPKKQEQQKIGQFFSKLDRQIE
```

```
CC80-3 -----QELRFKDENGEDYPDWKEKKLGDITEQSMYGIGASATR  
EHO91218 leeqklellqqqkkgymqkifsqelrfkdengedydpdwkekklgditeqsmygigasatr  
CC72-1 LEEQKLELLQQQKKGYMQKIFS-----
```

```
CC80-3 FDSKNIYIRITDIDEKSRKLNQNLTPDELNNKYKLRNDILFARTGASTGKSYIHKEE  
EHO91218 fdskniyiritdideksrklnyqnlttpdelnnkyklkrndilfartgastgksyihkee  
CC72-1 -----
```

```
CC80-3 KDIYNYFAGFLIKFKINEQNSPLFIYQFTLTSKFNKWVKVMSVRSQPGINSEEYAKLP  
EHO91218 kdiynnyfagflikfeideqnnplfiyqftltskfnkwvkmsvrsqpginseeyaklp  
CC72-1 -----
```

```
CC80-3 LVLPNKLEQQKIAKFLDRFDRQIELEKQKIEILQQQKKGLLQSMFI  
EHO91218 lvlpnkleqqkiaefldrfdqqielekqkieilqqqkglqsmfi  
CC72-1 -----
```



**S.SauNQ ACC-5-RTGT**

**This TRD pair was found in strains KPL1845 (ST96) and 21343(ST88).**  
Subspecies 21343 contains SauNQ and a novel TRD (NOVEL 1) paired with TRD K.

**>EHQ67679 THIS IS TRD NOVEL 1 + TRD K**

MSNTQKKNVPELRFPGFEGEWEEKKLGEVATFAKGLGAKKDVSNQNGVPVILYGELYTKY  
GAIVSKIFSKTDIPENKLMMAKKNVDLIPSSGETAIDIATASCIYLNKGVAVGGDINILT  
PQKQDGRFISLSINGINKNELSKYAQGKTVVHLYNNDIKNLKIAFPSEFEEQVRIGNFFS  
KLDQRQIELEEQKLELLQQQKKGVMQKIFSQELRFKDENGNDYPKWEKKIEDIASQVYGG  
GTPNTKIKEFWNGDIPWIQSSDVKVNDLILQQCNKFISKNSIELSSAKLIPANSIAIVTR  
VGVGKLCIVEFDYATSQDFLSLSSLYDKLYSLYSLLYTMKKISANLQGTSIKGITKKEL  
LDSIIKIPHNLEEQQKIGDLFYKIDKYISFNKCKIEILKSLKQGLLKKMFI

**>EHQ71248 THIS IS TRD N+Q ACC-5-RTGT**

MSNTQTKNVPELKFPEFEGEWEEKKLGEFAGKVTKKNVDKKYIETLTNSAELGIISQKDY  
FDKEISNIDNIKKYYVVEENDFVYNPRISNYAPFGPVNRNKLKGGKGVMSPLYTVFKIQNI  
DLNFIEFYFKSSKWYRFMALNGDSGARADRFSIKNRTFMEMPLHIPCMDEQIKIGQFFSK  
LDRQIELEEQKLELLQQQKKGVMQKIFSQELRFKDENGNDYPEWEERRFADIFKFHNKLR  
KPIKENLRVKGSYPYGGATGIIDYVDDFIFDGNLYLLIGEDGANIITRSAPLVYLVNGKFW  
VNNHAHILSPLNGNIQYLYQVAELVNYEKYNTGTAQPKLNIQNLKIIISVVIISTNLEEQQK  
IGSFLSKLDRQIDLEEQKLELLQQRKKALLKSMFV

**SPECIES KPL1845 CONTAINS THREE *SauI* S SUBUNITS.**

**>ETD06224 THIS IS TRD N+Q ACC-5-RTGT**

MSNTQTKNVPELKFPEFEGEWEEKKLGEFAGKVTKKNVDKKYIETLTNSAELGIISQKDY  
FDKEISNIDNIKKYYVVEENDFVYNPRISNYAPFGPVNRNKLKGGKGVMSPLYTVFKIQNI  
DLNFIEFYFKSSKWYRFMALNGDSGARADRFSIKNRTFMEMPLHIPCMDEQIKIGQFFSK  
LDRQIELEEQKLELLQQQKKGVMQKIFSQELRFKDENGNDYPEWEERRFADIFKFHNKLR  
KPIKENLRVKGSYPYGGATGIIDYVDDFIFDGNLYLLIGEDGANIITRSAPLVYLVNGKFW  
VNNHAHILSPLNGNIQYLYQVAELVNYEKYNTGTAQPKLNIQNLKIIISVVIISTNLEEQQK  
IGSFLSKLDRQIDLEEQKLELLQQRKKALLKSMFV

**>ETD11204 THIS HAS TWO NOVEL TRDS, NOVEL 2 + NOVEL 3.**

MTEQINTPELRFPEFKNEWSYDLVSDVVTNKSCKFDPKKEEAKKDIELDSIEQNTGRLLD  
TYISNDFTSQKNKFNKGNVLYSKLRPYLNKYYYATIDGVCSSSEIWVNLNTLNKDVLANKFL  
YYFIQTNRFSVTNKSAGSKMPRADWELVKNIRLYKGSIEEQEKIGYFFSKLDRQIELEE  
KKLELLEQQKKGVMQKIFAQELRFKDENGNDYPDWVTKKLGDIGKVMNKRIYKNETTEN  
GEIPFYKIGNFGKNADTFITREKFDEYKEKYPYPNVGDILISASGSIGRTIEYTGEDAYY  
QDSNIVWLNHNDEVINKYLKYFYKIVKWSGIEGTTIKRLYNKNILNTKIELPTVEEQYKM  
ANFLSKLDKIIDIQIEKIELLKQRKQGLLQKMFV

**>ETD09130 THIS HAS A NOVEL TRD (NOVEL 4) PAIRED WITH TRD f\***

1MSNTQKKNVPELRFPEFEGEWKDVKFVSIQEVSNKTSDLAKYPLFSLTVEKGITPKTER  
61YKRDFLVKKSDFNKIVEPRDIVYNPMNVTLGAILSKYNYDIALSGYYHVMKIINSFNP  
121FISNFLKTEKMIHYKKIATGSLMEKQRVHFSEFKNIKKFPTNKEQQKIGDFFSKLDRQ  
181IELQVQKLELLQQQKKGVMQKIFSQELRFKDENGEDYPDWKEKKLGDITEQSMYGIGASA  
241TRFDSKNIYIRITDIDEKSRKLNQNLTPDELNNKYKLRNDILFARTGASTGKSYIHK  
301EEKDIYNYFYAGFLIKFEIDEQNNPLFIYQFTLTSKFNKWKVMSVRSQPGINSEYAK  
361LPLVLPNKLEQQKIAEFLDRFDQQIELEKQKIEILQQQKGLLQSMFI

**PROMALS ALIGNMENT OF TRD AMINO ACID SEQUENCES WITH SECONDARY STRUCTURE PREDICTIONS.**

"e" means beta strand and "h" means alpha helix in the consensus secondary structure.

PROMALS alignment of all first TRDs.

|               |                                                                           |    |
|---------------|---------------------------------------------------------------------------|----|
| Conservation: | 999876797999999798898665 5 5                                              |    |
| NOVEL_4_189_  | 1 M--TEQINTPELRFPEFKNEWSYDLVSDVVTNKSCKFDPPK-----EEAKKDIELDSIEQNTG         | 56 |
| Z_GAC_191_    | 1 MSNTQTKNVPPELRFPGFEGEYSLDIFGNLATNKSSEKFNPNQ-----ENASIDIELDCEQNTG        | 58 |
| NOVEL2_194    | 1 MSNTQKKNVPPELRFPEFEGEWKDVKFSVIFQEVSNKTSDLA-----KYPLFSLTVEKGIPTPKT       | 58 |
| NOVEL1_199    | 1 MSNTQKKNVPPELRFPGFEGEWEEKLGEVATFAKGLGAKK-----DVSQNGVPVILYGLYFKYK        | 61 |
| R_GARA_192    | 1 MSNTQKKNVPPELRFPGFEGEWEEKLGEVAKIYDGTHTPK-----YTNNEGIFLSDVENIKTLNS       | 60 |
| J_GGA_172     | 1 MSNTQKKNVPPELRFPEFEGEWEEKLGDILKVNKSGKDYKH-----LDKGDIPVYGTGGYMTS--       | 57 |
| N_ACC_198     | 1 MSNTQKKNVPPELRFPGFEGEWEEKLGEVATFAKGLGAKK-----IETLTNSAELGIIISQKDYFDKEI   | 65 |
| O_CAAC_195    | 1 MSNKQKKNVPPELRFPGFEGEWEEKLGEVGTFTSGGTPLKS-----KSEYWNWDIPWITTDGIHNIKR    | 63 |
| T_CAAG_199    | 1 MSNTQTKNVPPELRFPGFEGEWEEKLGEIIPQIIISGSTPLKSN-----KEFYENGINNWVKTDDLNNKSV | 64 |
| C_GWAG_206    | 1 MSNTQTKNVPPELRFPGFEGEWEEKQVGELELFEKNGLNKNGKE-----YFGSGSSIVNFKDVFNNRS    | 60 |
| M_CAG_203     | 1 MSNTQTKNVPPELRFPGFEGEWEEKLEDLGLFQKYSFSRA-----KEGNKTKHIIHYGDIHSEKFK      | 61 |
| X_TCTA_192    | 1 MSNTQKKNVPPELRFPGFEGEWEEKQFADFTKINQGLQIAINE-----RKTEYSPELYFYITNEFLRPN   | 64 |
| B_AGG_199     | 1 MSNTQKKNVPPELRFPGFEGEWEEKQLGDLTDRVIRKNKNLES-----KKPLTISQGLGLDQTEYFYSKV  | 65 |
| A_CCAY_203    | 1 MSNTQKKNVPPELRFPGFEGEWEEKQLGDLTTKIGSGKTPKGG-----SENYTNKGIIFLRSQNIIRNGKL | 64 |
| e*_GAG_190    | 1 MSNTQKKNVPPELRFPGFEGEWEEKSISFLKESKIKSGNSG-----HAKKLTVKLWKGKVVPPKET      | 61 |
| V_CNGA_210    | 1 MSNTGKMNVPPELRFPGFEGEWEEKLRELRLNPKDKYSYTGPGFSGDLKKSDDYTDGQWIIQLQYIGDGYF | 70 |
| b*_GGHA_200_  | 1 MSNTQKKNVPPELRFPEFEGEWEEKLEDLTFEIKDGTHTGTH-----ENVNWGPWLSAKNIKNKNI      | 61 |
| Consensus_ss: | eee eeeeeeeeeee eeeeeeeeeee                                               |    |

|               |                                                                            |     |
|---------------|----------------------------------------------------------------------------|-----|
| Conservation: | 5                                                                          |     |
| NOVEL_4_189_  | 57 RLLDITY-----ISNDFTSQKNKFNKGNVLYSKLRPY---LNKYYYATI---DGVCSSIEIWLNTLNK-D  | 113 |
| Z_GAC_191_    | 59 RLIIKIY-----NSKEFSSQKNKFNPNQVLYGKLRPY---LNKYYFTTK---SGVCSSEIWLKSTKE-D   | 115 |
| NOVEL2_194    | 59 ERYKRDFL-----VKKSDNFKIVEPRDIVYNPMNVT---LGAILDSKYN---YDIALSGYVHMKIIN---  | 115 |
| NOVEL1_199    | 62 AIVSK--IFS-KTDIPENKLMKAKKNDVLI PSSGETAIDIATASCIYLN--KGVAVGGDINILTPQ---- | 122 |
| R_GARA_192    | 61 SK-----YIS-EEAFKEKFKIRPEFGDILMTRIGDI---GTPNIVSSN--EKFAYVSVLALLKTK----   | 114 |
| J_GGA_172     | 58 -----VSEPLSEIDAVGIGRGTI---NKPYLLEA-----PFWTVDTLFYCTPEK----              | 99  |
| N_ACC_198     | 66 S-----NIDNKKYVVVEENDFVYNPRMSNYAPFPGVNRNKLK--KKGVMSPLYTVFKIQ----         | 118 |
| O_CAAC_195    | 64 ENITN--FIT-EKGLNESSAKLITNEALIAMYGQK--TRGMSAILNF---EATTNQACAIYQ-----T    | 120 |
| T_CAAG_199    | 65 THSKE--KIT-EYAMKSLKLLKLVKNSVLIAMYGGFN-QIGRTGLLK---IDATINQAIASALLMNH---  | 123 |
| C_GWAG_206    | 61 INTNNTGKV--NVNSKELKNYSVEKGDVFFTRTSEVIGEIGYSPVILNDP-ENTVFGSGLRGRPKSGID   | 128 |
| M_CAG_203     | 62 TVLDSD-GNI-PNIIIEKAVFELIQKGDIVFADASEDYSDLGKAVMIDFEP-NSLISGLHHLFRPLN---  | 125 |
| X_TCTA_192    | 65 QTKYF-----IENPPQSVIANKEDILMTRTGN---TGKVVTVN---FGAFHNNFPKIKFDKN---       | 115 |
| B_AGG_199     | 66 SSK-----NLENYTLIKNGEFAYNKYSNGYPLGAIKRLTRY--DSGVLSSSLYICFSIKS---         | 118 |
| A_CCAY_203    | 65 NLMDLV-YIS-KGIDDEMKNRSRTYGDVLLNITGAS---IGRTAINSIVE--THANLNQHVCIIRLKK--- | 125 |
| e*_GAG_190    | 62 F-----KDSDNTQYKRKAGQLMYGKLDLFL---NCAFIVPDS---LNNYESTIDSPSDFPT---        | 112 |
| V_CNGA_210    | 71 YNSNKV--FRS-NEKAEVLKSCNVFPGDIVIAKMADP---TARAIVPDNIIKGYLMSADGIRLSVDT--V  | 133 |
| b*_GGHA_200_  | 62 IISDDRKISESDYKIKYKYLEKGLDILLIVGTI---GRAAIVKNP--NNIAFQRSVAIKLTKA---      | 122 |
| Consensus_ss: | e eeeee eeeee eeeee eeeee eeeee                                            |     |

|               |                                                                             |     |
|---------------|-----------------------------------------------------------------------------|-----|
| Conservation: | 9 5 5 99 799 9999898998                                                     |     |
| NOVEL_4_189_  | 114 VLANKFLYYFIQTRNFSS-VTNKSAG---SKMPRADWELVKNIIRLYKGS-IEEQEKIGYFFSKLDRQIE  | 177 |
| Z_GAC_191_    | 116 KLLNLFLLYFIQTRKYSV-VASKSAG---SKMPRADWGLIENIRVYFPE-LCEQQKIGQFFSKLDRQIE   | 179 |
| NOVEL2_194    | 116 SFNPDFISNFKLTKEMIIHYKKIATGS--LMEKQRVHFSEFKNIKKFPPT-NKEQQKIGDFFSKLDRQIE  | 182 |
| NOVEL1_199    | 123 QDGRFISLSINGI-NKNELSKYAQG---KTVVHLYNNDIKNLKIAFPSEFEEQVRIGNFFSKLDRQIE    | 187 |
| R_GARA_192    | 115 NLNSYFLKLLLSSTQNELWRKTLHV---AFPKKINKNEIGKIKINYPK-KQEQKIGQFFSKLDRQIE     | 180 |
| J_GGA_172     | 100 EADILFILSLFRKINWKL---YDES---TGVPPLSKQITINKINRLVPT-NKEQQKIGEFFSKLDRQIE   | 160 |
| N_ACC_198     | 119 NIDLNFIEFYFKSSKRYRFMALNGDSGA-RADRFSIKDRTFMEMPLHIPC-MDEQIKIGDFFSKLDRQIE  | 186 |
| O_CAAC_195    | 121 NQININVFVQYFQR--LYEFLRSLNSNE---GSQKNLSLSLLKETTILNYPN-EQEQKIGDFFSKLDRQIE | 183 |
| T_CAAG_199    | 124 ETNPEFIQAFVNLQY-VKGWKRYAASS---RKDPNITTKDIEQFKVYVVS-INEQQKIGEFFSKIDHQIE  | 187 |
| C_GWAG_206    | 129 LINNNFKRVVFFNFSRFRKEMITKSSM---TTRALTSGTAINKMKVIYPVSAKEQKIGDFFSKLDRQIE   | 194 |
| M_CAG_203     | 126 NAISNFIIFYTKTSLYKFIROQGTG---ISVLGISKLLNVLNVLPRSELEQQKIGQFFSKLDRQIE      | 191 |
| X_TCTA_192    | 116 LYDRLFLVEVLNSSKIQNKILSLAGS---STIPDLNHSDFYSISSYPL-LREQQKIGKFFSKLDRQIE    | 180 |
| B_AGG_199     | 119 EMSKDFMEAYFDSTHWYREVSGIAGEVARNHGLLNVSVDNFFTTILIKYPS-LEEQQKIGKFFSKLDRQIE | 187 |
| A_CCAY_203    | 126 EYYYIFFGQYLLSRKGRKIFLAQSG---GSREGLNFKEIANLKIPTPTIFEEQQKIGKFFSKLDRQIE    | 191 |
| e*_GAG_190    | 113 NGDSKFLLEIRIKLSFYKFGDIANGS---RKAKRINQDFTLSLPLVFAFK-YDQLRIGEFFSKLDRQIE   | 178 |
| V_CNGA_210    | 134 HFNTKFLVLEICINRKSFRKVEDNSSG---STRMRIGLSTLGSLLTKTTT-LKEQQKIGQFFSKLDRQIV  | 198 |
| b*_GGHA_200_  | 123 TYDVGFIFQLFQTKYFKNLLLRQVQV---SAQFGLYLGDIRKIKISITNIEEQKIGIFFSKLDRQIE     | 188 |
| Consensus_ss: | hhhhhhhh hhhhhhhhh hhhhh ee hhhhhhhhhhhhhhhhh                               |     |

|               |                      |  |
|---------------|----------------------|--|
| Conservation: | 977899999899         |  |
| NOVEL_4_189_  | 178 LEEKKLELLEQQ 189 |  |
| Z_GAC_191_    | 180 LEEQKLELLEQQ 191 |  |
| NOVEL2_194    | 183 LQVQKLELLEQQ 194 |  |
| NOVEL1_199    | 188 LEEQKLELLEQQ 199 |  |
| R_GARA_192    | 181 LEEQKLELLEQQ 192 |  |
| J_GGA_172     | 161 LEEQKLELLEQQ 172 |  |
| N_ACC_198     | 187 LEEQKLELLEQQ 198 |  |
| O_CAAC_195    | 184 LEEQKLELLEQQ 195 |  |
| T_CAAG_199    | 188 LEEQKLELLEQQ 199 |  |
| C_GWAG_206    | 195 LEEQKLELLEQQ 206 |  |
| M_CAG_203     | 192 LEEQKLELLEQQ 203 |  |
| X_TCTA_192    | 181 LEEQKLELLEQQ 192 |  |
| B_AGG_199     | 188 LEEQKLELLEQQ 199 |  |
| A_CCAY_203    | 192 LEEQKLELLEQQ 203 |  |
| e*_GAG_190    | 179 LQKQKLELLEQQ 190 |  |
| V_CNGA_210    | 199 LEEQKLELLEQQ 210 |  |
| b*_GGHA_200_  | 189 LEEQKLELLEQQ 200 |  |
| Consensus_ss: | hhhhhhhhhh           |  |

PROMALS alignment of all second TRDs.

Conservation: 998979999799999989696797 9 5
NOVEL3\_205 1 KKGVMQKIFAQELRFKDENGNDYDPDWVTKKLGDIKGVAMNKRKYKNE-----TTENGEIPFYKIGNFG 63
S\_GCA\_200 1 KKGVMQKIFSQELRFKDENGNDYDPDWNERLGEVTTVTMGSQPKSVN-----YTDNSNDTVLIQGNADIE 65
d\*\_CYAA\_220 1 KKGVMQKIFSQELRFKDENGNDYDPWENVMQKVLKDKTEGIRKGPFGGALKKDFIVESGYAVYBQRNAI 70
a\*\_GAA\_208 1 KKGVMQKIFSQELRFKDENGNDYPEWENKRIEDIAIVNKGFTPSNTN-----NEYWDNNDKNWLSIAGNM 65
E\_TCA\_194 1 KKGVMQKIFSQELRFKDENGNDYPEWEETIIEIAQINXGKDKTKD-----AITNGSYDFYVRSPIV 62
W\_CRAA\_211 1 KKGVMQKIFSQELRFKDENGNDYDPWEKQGLGELSQIVRGASPRPIK---DPKWFNKESDIWGLRISDVT 67
Q\_ACAY\_197 1 KKGVMQKIFSQELRFKDENGEDYSEWEERRFADIFKFNHKLKRPIKE-----NLRVKGSGYPYVATGII 64
G\_ACA\_196 1 KKGVMQKIFSQELRFKDENGEYPEWENKFIKIDIFENNRKRKITS-----SLREKGLYPYVATGII 64
f\*\_GAA\_224 1 KKGVMQKIFSQELRFKDENGEDYDPWEKQGLGELSDIETQSMYIGASA-----TRFDSKNYIRITDID 62
L\_TTTA\_213 1 KKGVMQKIFSQELRFKDENGNDYPNWRTIELKNILENIVDNRGKTPD-----NAPSEKYPLELVNALG 63
Y\_CTA\_209 1 KKGVMQKIFSQELRFKDENGNDYDPWEKQGLGELSDIETQSMYIGASA-----NIYWNKGEYVWVTFDIN 65
U\_GAY\_193 1 KKGVMQKIFSQELRFKDENGEDYDPWEVTTIQNITKYTSKSSNQY-----ADKDNSKGYVYDAVQEI 65
I\_YTCA\_220 1 KKGVMQKIFSQELRFKDENGNDYDPWERIKFFDVIKDFRGRTPK---KLNMEWSDEGYLALSAVNVK 67
K\_GCA\_212 1 KKGVMQKIFSQELRFKDENGNDYPKWEKKEKEDIAASQVYGGGTPNTK-----IKEFWNGDIPWIOSSDVK 65
D\_ATC\_204 1 KKGVMQKIFSQELRFKDENGEDYPWENSKIEKYKERNERSDK-----GQMLSVTINSIGI 56
c\*\_GAY\_209 1 KKGVLQKIFSQELRFKDENGNDYPEWFRFARFKDFMYKPINIRPAINI-----SKSELLTVKLCHE 59
P\_AGG\_214 1 KKGVMQKIFSQELRFKDESGNDYDPWEKQGLGELSDIETQSMYIGASA-----KKPLTISGQLGLIDTEYF 66
F\_TTAA\_216 1 KKGVMQKIFSQELRFKDEEGKDYDPWKSISQEIFENKGGTALETE-----FNFDDGNYKVISIGSYS 62
H\_TAC\_206 1 KKCVIQKIFSQELRFKDEEGNYKQWGNKQKLDVLEFNSKRTINE-----NEYPVLTSRQGG 57
Consensus\_ss: hhhhhh eeeeeheeee eeeeeeeee

Conservation: 5 7
NOVEL3\_205 64 KNADTFITR--EKF---DEYKEKYPYPNVGD-ILISASG-----SIGRTIEYTG--EDA-YYQDSNIV 117
S\_GCA\_200 66 NGLINPR-----IYTREVTKLIQKDE-IILTVRA-----PVGKLAMAQIN-----ACIGRGVC 112
d\*\_CYAA\_220 71 YDISNFRYY-INEN---KYKEMQSFVQPNP-IIMSCSG-----TIGRLALIPH-NYTK-GIINQALI 126
a\*\_GAA\_208 66 QKLYL-KGN-KGIS---KDAAKNYMKVKNDT-LIMSFKL-----TIGKLAIVKAP-----LYTNEAIC 117
E\_TCA\_194 63 YK-----INTFSYEGEAILTVGDGV-----GVGKVFHYVNGK---FDYHQRVY 102
W\_CRAA\_211 68 NQNGKIYHLEQKLS---IEGQEKTRVLVTTTH-LLLSIAA-----SIGKPMVMNVK-----TGVDHDFL 121
Q\_ACAY\_197 65 DYV-----DDFIFDGNV-LIIGEDGANIITRSAPLVYLVNGK-----FWVNNHAH 108
G\_ACA\_196 65 DYV-----KDYLFNNEERLLIGEDGAK-WGQFETSSFIANGQ-----YWVNNHAH 108
f\*\_GAA\_224 63 EKSRLKNYQ-NLTT---PDELNNKYKIKLRND-ILFARTGA-----STGKSYIHKEEKDIYNYFAGFLI 121
I\_YTCA\_220 64 YRPAIKV-SKFSV-ENTYNNWFREHLKEND-ILFSTVG-----NTGIVSLMDNYK---AVIAQNI 120
Y\_CTA\_209 66 NSKNIESE-NKLT---QEGYKARQLPENT-LLVTCIA-----SIGKNAILRKQ-----GSCNQI 118
U\_GAY\_193 66 GK-----DSNYDIEESY-ISILKDG-----GVRNLNLRPGK-----SSVIGTM 104
I\_YTCA\_220 68 KGYIDFNVE-AKYGNLDLYTRWMRGNELYKQG-VLFTTEA-----PMGNVAQVPDNKG---YLSQRTI 126
K\_GCA\_212 66 VNDLILQCNKFIK--NSIELSSAKLIPANS-IAIVTRV-----GVGKLCVLEFD-----YATSQDFL 121
D\_ATC\_204 57 IKFSELDK--KDNS---SKNKSNYKVVRRND-IAYNSMRM-----WQGASGKSNYN---GIVSPAYT 109
c\*\_GAY\_209 60 KGIEK-ANI-NRVL---KLGATNYKRFEGQ-FYIGKQNF-----FNGAFDIVPKKFDG---LYSSDVP 115
P\_AGG\_214 67 SKSVS-----SKNLENYTLIKNGE-FAYNKSYSN---GYPLGAIKRLTRYDS---GVLSLYI 117
F\_TTAA\_216 63 INSTYNDQN-IRVN---KNKKEKYILSKGD-LAMVLNDKTKDGKIGRSIFIDKDNQ---YTYNQRT 123
H\_TAC\_206 58 LILQSDYKDRKTF---AESNIGYFILPKNH-ITYRSRS-----DDGIFKFNLMIDV-GIISKYYP 115
Consensus\_ss: ee eeeee eeeee eeee ee

Conservation: 6 5 7 98 76 7
NOVEL3\_205 118 WLNHND-EVINKYLYFYKI----VKWSGIEG---TTIKRLYNKLNILNTKIELPT-VEEQYKMANFLS 176
S\_GCA\_200 113 SIKG-----DKFLYFLEWFATQNKWIRFSQG---STFESISGNDIRNIHIIKIPV-EDERTKIIKLLN 171
d\*\_CYAA\_220 127 RFRTNH-KIRSEFFLIFMRSNQMKRILLEANPG---SAITNLVVPVKELKLIFFPLPV-KFEQDKISQFTH 191
a\*\_GAA\_208 118 HFIWVKNINTEFYIYYLNSL---NISITFGQA---VKGVTLNNDNSINSIIVKLPN-EEEQNIIAKFLI 179
E\_TCA\_194 103 KISDFK-NYYGLLFFYFSQN-FLKETKKSYSK---TSVDSVRKMIANMKVPRPI-YIEQKQKIGQFIK 165
W\_CRAA\_211 122 IFLKP--KFNLFMYYWLEYF--KDKWSKYGQP---GSQVNLNSEIVKSQTLNMPN-NHEQEKVQFPFN 182
Q\_ACAY\_197 109 ILSPL--NGNIQYLYQVAEL---VNYEKYNTG---TAQPKLNIQNLKIINVVISTNLEEQQKIGSFLS 168
G\_ACA\_196 109 VVKS--DHNLFMYYLNF---KELRAFVTG---NAPAKLTHANLNCINLKIIPC-LTEQDKVSALLK 167
f\*\_GAA\_224 122 KFKINE-QNSPLFIYQFTLTSKFNKWKVMSVR---SGQPGINSEYAKLPLVLPN-KLEQQKIAKFLD 185
L\_TTTA\_213 121 GLRVNN--NNLPSFYIYYMLSYKGNQKIKRIQMG---AVQPSVKVQKFIKYLVP-I-KDEQEKVAKLLI 184
Y\_CTA\_209 119 AVVPFE-NINIDYLYISDSL--STFMKSIAGK---TATQIVNKNTFENLEIYLAP-FEEQNKIADLIS 180
U\_GAY\_193 105 YIQSN--NVDIEFLYYRMKV---DFKYYIIG---STIPHLYFKDYKSKETLYIPSSIQEQAKIGMFS 164
I\_YTCA\_220 127 AFNSNE-KITDNFLASLLSSENVNDLKLCSG---ATAKGVSKNLLNRSYVTTIPHSISEQEEIAEFFF 191
K\_GCA\_212 122 SLSSLK--YDKLYSLSL--LYTMKKISANLQ---TSIKGITKKELLNSI IKIPHNLEEQQKIGDLYF 183
D\_ATC\_204 110 VLYPTQ-NTSSLFYGKFKTHRMIHKFKINSQGL---TSDTWNLKYLKLNINIDIPV-LEEQEKIGDFFK 175
c\*\_GAY\_209 116 AFEINTEKIEPNYFISYISRPSFYKSKKYSTG---TGSKRIHENTVNLNLSHLPC-LNEQLKIASFVC 180
P\_AGG\_214 118 CFSIKS-EMSKDFMEAYFDSTHWHYVSGIAVEGARNHGLNLSVNDFFTTILIKYPS-LEEQRKIGDFFI 185
F\_TTAA\_216 124 RLIPFA-ENDNKFLWFLMNTDLIRNKIKGMMQG---ATQVYINYSIKLISIQPL-LEEQQKIRGFLE 187
H\_TAC\_206 116 VFKGI--DANQYLLTHLNLQ-LKKEYIKYATG---TSQVLVSKQDLQNIKTKLPS-YEEQKIGDFFS 177
Consensus\_ss: eee hhhhhhhh hhhhhhhh hhhh ee hhhhhhhhhh

Conservation: 5 75 56 97 697 786
NOVEL3\_205 177 KLDKIIDIQIEKIELLKQRKQGLLQKMFV----- 205
S\_GCA\_200 172 SLDVLSNKTDLKIQNLKQRKQSLQLKQIFV----- 200
d\*\_CYAA\_220 192 IINRRIEQSEKKIESLKNRQKQGLQKLFV----- 220
a\*\_GAA\_208 180 EVDKTVNNQLVKTKLLKQRKQGLLQKMFV----- 208
E\_TCA\_194 166 RVDNKTQKQVIEILLKQRKQKALLQKMFV----- 194
W\_CRAA\_211 183 RNEKLIELOQEKIMYIKRCKQVLLQKMFV----- 211
Q\_ACAY\_197 169 KLDKQIDLEEQKLELLQQRKQKALLKSMFV----- 197
G\_ACA\_196 168 SIDNKMNQMNRIEILLKERRKELLQKMFV----- 196
f\*\_GAA\_224 186 RFDKQIELEKQKIEILQKQKGLLQKMFV----- 214
L\_TTTA\_213 185 EIDKLVNKLKIEILLQQRKQKALLKSMFV----- 213
Y\_CTA\_209 181 SLEELIEKQASKLIKMKSRKQGMQIMFV----- 209
U\_GAY\_193 165 NLDKLIENKLNKLNCLKQLKQGLLQKMFV----- 193
I\_YTCA\_220 192 KINQLVLELQYKIEHTSKQKQVFLQKMFV----- 220
K\_GCA\_212 184 KIDKYSFNKCKIEMLKSLKQGLLQKMFV----- 212
D\_ATC\_204 176 KMDILISKQKIKIEILEKEKQSFQKMFV----- 204
c\*\_GAY\_209 181 FLNRKIELELKERKIKYIKKQKQALLQKMFV----- 209
P\_AGG\_214 186 KLDKQIELEEQKLELLQQRKQKALLKSMFV----- 214
F\_TTAA\_216 188 VLSGITTKQLHKIDQLKERRKQKMFV----- 216
H\_TAC\_206 178 EIDRLVEKQSSKVGRLKVRKKEKLLQKMFV----- 206
Consensus\_ss: hhhhhhhhhhhhhhhhhhhhhhhhhhhhhhh

PROMALS alignment of all TRDs.

| Conservation:             | 799997576 | 6                       | 85                  | 5                      |                     |                    |    |
|---------------------------|-----------|-------------------------|---------------------|------------------------|---------------------|--------------------|----|
| CC80-3 f*                 | 1         | -----QELRFKDENGEDY      | PDWKEKKLGDITEQSMY   | GIGASA-----            | TRFDSKNIYIRITDI     | 51                 |    |
| CC45-1L                   | 1         | -----QELRFKDENGNDY      | PNWRTIELKNI         | LENIVDNRGKTP-----      | DNAPSEKYPLLEVNAL    | 52                 |    |
| CC97 c*                   | 1         | -----QELRFKDENGNDY      | PEWRFARFKDFMYKPI    | NIRPAIN-----           | ISKSELLTVKHLHCK-GI  | 52                 |    |
| CC22-1I                   | 1         | -----QELRFKNENGNDY      | PDWERIKFFDV         | DKVIDFRGRTPKK----      | LNMEWSDEGLYLA       | 56                 |    |
| CC873D                    | 1         | -----QELRFKDENGEDY      | PHWENSKIEKYLKERNERS | SDKGQM-----            | LSVTIN--SGIKFSEL    | 52                 |    |
| CC5-1D                    | 1         | -----QELRFKDENGEDY      | PDWENSKIEKYLKERNERS | SDKGQM-----            | LSVTIN--SGIKFSEL    | 52                 |    |
| CC30-1D                   | 1         | -----QELRFKDENSEDY      | PHWENSKIEKYLKERNERS | SDKGQM-----            | LSVTIN--SGIKFSEL    | 52                 |    |
| CC5-2H                    | 1         | -----QELRFKDEEGNY       | KGWNNKQLKDVLEF      | SNKRTINE-----          | NEYPVLTSSRQ         | 46                 |    |
| CC133-2fromED133 d*       | 1         | -----QELRFKDENGNDY      | PEWENVMLQKVLKDKTE   | GIKRPFPGG-ALKKDI       | FVSGYAVYEQRNA       | 59                 |    |
| CC72-2S                   | 1         | -----QELRFKDENGNDY      | PDWTNERLGEVTTVT     | MGQSPKSVN-----         | YTDNSNDTVLIQGNADI   | 54                 |    |
| CC93-3 a*                 | 1         | -----QELRFKDENGNDY      | PEWENKRIEDIANV      | NKGFPTSTNN-----        | NEYWDDNKNWLSIAGM    | 54                 |    |
| CC93-2K                   | 1         | -----QELRFKDENGNDY      | PKWEEKKIEDIASQ      | VYGGGTPNTK-----        | IKEFWNGDIPWIQSSDV   | 54                 |    |
| CC30-2K                   | 1         | -----QELRFKDENGNDY      | PNWEEKKIEDIASQ      | VYGGGTPNTK-----        | IKEFWNGDIPWIQSSDV   | 54                 |    |
| CC80-2W                   | 1         | -----QELRFKDENGNDY      | PDWEEKQLGELSQ       | IVRGASPRPIK----        | PKWFNKESDIGNWLRISDV | 56                 |    |
| CC75-2W                   | 1         | -----QELRFKDENGNDY      | PDWEEKQLGELSQ       | IVRGASPRPIK----        | PKWFNKESDIGNWLRISDV | 56                 |    |
| CC59Q                     | 1         | -----QELRFKDENGNDY      | SEWEERRFADIFK       | FHNKLRKPIK-----        | ENLRFVNGSYPYIGATGI  | 53                 |    |
| CC72-1Q                   | 1         | -----QELRFKDENGNDY      | PEWEERRFADIFK       | FHNKLRKPIK-----        | ENLRFVNGSYPYIGATGI  | 53                 |    |
| CC1-2G                    | 1         | -----QELRFKDENGNDY      | PEWENKRIEDIANV      | NKGFPTSTNN-----        | NEYWDDNKNWLSIAGM    | 54                 |    |
| ST425-1E                  | 1         | -----QELRFKDENGNDY      | PEWEETT             | IKELIAQINTGKDKTKD----- | AITNGSYDFYVRSPI     | 51                 |    |
| CC15TRD2E                 | 1         | -----QELRFKDENGNDY      | PEWEETT             | IKELIAQINXGKDKTKD----- | AITNGSYDFYVRSPI     | 51                 |    |
| CC133 771E                | 1         | -----QELRFKDENGDDY      | PEWEETT             | IKELIAQINTGKDKTKD----- | AITNGSYDFYVRSPI     | 51                 |    |
| CC398-1E                  | 1         | -----QELRFKDENGNDY      | PEWEETT             | IKELIAQINTGKDKTKD----- | AITNGSYDFYVRSPI     | 51                 |    |
| CC80-1Y                   | 1         | -----QELRFKDENGNDY      | PDWEEKKLEIACV       | YTGNTPSKKE-----        | NIYWNKGEYVWVTPDI    | 54                 |    |
| CC75-1U                   | 1         | -----QELRFKDENGEDY      | PDWEVTTIQNIT        | KYSSKSSNQY-----        | ADKDNSKGYPVYDAVQE   | 54                 |    |
| CC1-1F                    | 1         | KKGYMQKIFSQELRFKDEEGKDY | PDWKSQIQELFENKGG    | TALETE-----            | FNFDNGYKVISIGSY     | 61                 |    |
| CC873 e*                  | 1         | -MSNTQKKNVPELRFPGFE     | ----GEWEEKS         | ISSFLKESKIKGSNGS-----  | HAKKLTVKLWKGKGVV    | 56                 |    |
| CC80-2Z                   | 1         | -MSNTQTKNVPELRFPGFE     | ----GEYSLDIFGNL     | ATNKSEKFNPNQ-----      | ENASIDIELDCIEQNTG   | 58                 |    |
| CC80-3XS.Saul1819ORF2227P | 1         | -MSNTQKKNVPELRFPEFE     | ----GEWEEKQFADFT    | KINQGLQIAINE-----      | RKTEYSPELYFYITNEF   | 59                 |    |
| CC80-1X                   | 1         | -MSNTQKKNVPELRFPGFE     | ----GEWEEKQFADFT    | KINQGLQIAINE-----      | RKTEYSPELYFYITNEF   | 59                 |    |
| CC75-1T                   | 1         | -MSNTQTKNVPELRFPGFE     | ----GEWEEKELGEI     | FQIISGSTPLKSN-----     | KEFYENGINNWVKTDDL   | 59                 |    |
| ST130-1T                  | 1         | -MSNTQKKNVPELRFPGFE     | ----GEWEEKELGEI     | FQIISGSTPLKSN-----     | KEFYENGINNWVKTDDL   | 59                 |    |
| CC93-3M                   | 1         | -MSNTQTKNVPELRFPGFE     | ----GEWEEKLEDLGL    | FQKSYFSRA-----         | KEGNGKTKHIHYGDI     | 56                 |    |
| CC133 771-1strain32320Hsd | 1         | -MSNTQTKNVPELRFPGFE     | ----GEWEEKLEDLGL    | FQKSYFSRA-----         | KEGNGKTKHIHYGDI     | 56                 |    |
| CC133-2fromED133J         | 1         | -MSNTQKKNVPELRFPGFE     | ----GEWEEKLES       | IIKVN                  | SGKDYKH-----        | LDKGDIPYVGTGGY     | 54 |
| CC72-2J                   | 1         | -MSNTQKKNVPELRFPEFE     | ----GEWEEKQLGNI     | IKVN                   | SGKDYKH-----        | LDKGDIPYVGTGGY     | 54 |
| CC51TRD1J                 | 1         | -MSNTQTKNVPELRFPGFE     | ----GEWEEKLEDI      | IKVN                   | SGKDYKH-----        | LDKGDIPYVGTGGY     | 54 |
| CC30-2strainMRSa252HsdSJ  | 1         | -MSNTQTKNVPELRFPGFE     | ----GEWEEKLGD       | LIIKVN                 | SGKDYKH-----        | LEKGDIPYVGTGGY     | 54 |
| CC59-1J                   | 1         | -MSNTQKKNVPELRFPEFE     | ----GEWEERKLD       | LIIKVN                 | SGKDYKH-----        | LDKGDIPYVGTGGY     | 54 |
| CC72-1R                   | 1         | -MSNTQKKNVPELRFPGFE     | ----GEWEEKLGEV      | AKIYD                  | GTHQTPK-----        | YTNEGIKFLSVENI     | 55 |
| CC15TRD1O                 | 1         | -MSNKQKKNVPELRFPGFE     | ----GEWEEKLGEV      | GTF                    | SGGTPLKS-----       | KSEYWNWDIPWITGDI   | 58 |
| CC398-1strain398HsdSN     | 1         | -MSNTQKKNVPELRFPGFE     | ----GEWEEKLGEF      | AGKVT                  | QKNVDKDY-----       | IETLTSNSELGIISQKDY | 60 |
| ST425-1C                  | 1         | -MSNTQTKNVPELRFPGFE     | ----GEWEEKQVGE      | LLEF                   | KNGLNKGKE-----      | YFGSGSSIVNFKDV     | 55 |
| CC30-1strainMRSa252HsdSC  | 1         | -MSNTQTKNVPELRFPGFE     | ----GEWEEKVGE       | LLEF                   | KNGLNKGKE-----      | YFGSGSSIVNFKDV     | 55 |
| CC45-1strain3067HsdSC     | 1         | -MSNTQKKNVPELRFPGFE     | ----GEWEEKVGE       | LLEF                   | KNGLNKGKE-----      | YFGSGSSIVNFKDV     | 55 |
| CC97A                     | 1         | -MSNTQKKNVPELRFPGFE     | ----GEWEEKQLG       | DLTTK                  | IGSGKTPKGG-----     | SENYTNKGIPLFRSQNI  | 59 |
| CC1-2strainMW2HsdSA       | 1         | -MSNTQTKNVPELRFPGFE     | ----GEWEEKLGNL      | TTK                    | IGSGKTPKGG-----     | SENYTNKGIPLFRSQNI  | 59 |
| CC1-1strainMW2HsdSA       | 1         | -MSNTQKKNVPELRFPGFE     | ----GEWEEKLGNL      | TTK                    | IGSGKTPKGG-----     | SENYTNKGIPLFRSQNI  | 59 |
| CC5-2strainN315HsdSA      | 1         | -MSNTQTKNVPELRFPGFE     | ----GEWEEKLGNL      | TTK                    | IGSGKTPKGG-----     | SENYTNKGIPLFRSQNI  | 59 |
| CC75-2V                   | 1         | -MSNTGKMNPELRFPGFE      | ----GEWEEKLRE       | LRNPK                  | DYSYTG              | PGSDLKSDYTTDGIQI   | 65 |
| CC22-1strain5096HsdSB     | 1         | -MSNTQKKNVPELRFPGFE     | ----GEWEEKLGD       | LTD                    | RVIRKKNLES----      | KKPLTISGQLGLIDQTEY | 60 |
| CC51TRD2P                 | 1         | -----QELRFKDESNDY       | PDWEEKLGEVADR       | RVIRKKNLES----         | KKPLTISGQLGLIDQTEY  | 55                 |    |
| CC5-1strainN315HsdSB      | 1         | -MSNTQKKNVPELRFPGFE     | ----GEWEEKLGD       | LTD                    | RVIRKKNLES----      | KKPLTISGQLGLIDQTEY | 60 |
| CC93-2 b*                 | 1         | -MSNTQKKNVPELRFPEFE     | ----GEWEEKLED       | TLEF                   | IKDGTGTH-----       | ENVNNGPWLLSAKNI    | 56 |
| Consensus_ss:             |           | eeeeeeeeeeee            |                     |                        |                     | eeeeeee e          |    |

Conservation:

|                           |    |                                                                         |                                            |                       |                |
|---------------------------|----|-------------------------------------------------------------------------|--------------------------------------------|-----------------------|----------------|
|                           |    | 5                                                                       |                                            | 5                     |                |
| CC80-3 f*                 | 52 | DEKSRKLN-YQNLTP----                                                     | DELNNKYKLRNDILFARTGAST-----                | GKS-YIHKEEKDIYNYFAGFL | 110            |
| CC45-1L                   | 53 | GYRYPAYI-KVSKFVSE-NTYNNWFREHLKENDILFSTVGNT-----                         |                                            | GIV-SLMDN----         | YKAVIAQNI 109  |
| CC97 c*                   | 53 | EKANINRV-----                                                           | LKLGATNYKRFEGQFIYKQNFN----                 | GAF-DIVPKK--          | FDGLYSSSDV 104 |
| CC22-1I                   | 57 | KKGYIDFNVEAKYGNLD-LYTRMWRGNELYKQVLFTEAPM-----                           |                                            | GNV-AQVPD--           | NKGYILSQRT 115 |
| CC873D                    | 53 | DRKDN-----                                                              | SSKNKSNYKVVVRKNDIAYNSMRMQ-----             | GAS-GKSNY----         | NGIVSPAY 98    |
| CC5-1D                    | 53 | DRKDN-----                                                              | SSKDKSNYKVVVRKNDIAYNSMRMQ-----             | GAS-GKSNY----         | NGIVSPAY 98    |
| CC30-1D                   | 53 | DRKDN-----                                                              | SSKDKSNYKVVVRKNDIAYNSMRMQ-----             | GAS-GRSNY----         | NGIVSPAY 98    |
| CC5-2H                    | 47 | GLILQSD---YYKDRKT-FAESNIGYFILPKNHITYRSRSD-----                          |                                            | GIFKFNLNLM--          | IDVGIISKYY 104 |
| CC133-2fromED133 d*       | 60 | IYDISNF---RYYINE-NKYKEMQSFVQPNDIIMSCSGTI-----                           |                                            | GRL-ALIPHN--          | YTKGIINQAL 115 |
| CC72-2S                   | 55 | ENGL-----                                                               | INP-RIYTRVTKLIQKDEIILTVPAPV-----           | GKL-AMAQI----         | NACIGRGV 101   |
| CC93-3 a*                 | 55 | NQKYLK---GNKGIS---KDAAKNYMKVKNDTLIMSFKLTI-----                          |                                            | GKL-AIVKA----         | PLYTNEAI 106   |
| CC93-2K                   | 55 | KVNDLILQ-QCNKFISK-NSIELSSAKLIPANSIAIVTRVGV-----                         |                                            | GKL-CLVEF----         | DYATSQDF 110   |
| CC30-2K                   | 55 | KVNDLILR-QCNKFISK-NSIELSSAKLIPANSIAIVTRVGV-----                         |                                            | GKL-CLVEF----         | DYATSQDF 110   |
| CC80-2W                   | 57 | TNONGKIY-HLEQKLS---IEGQEKTRVLVTHLLLSIAASI-----                          |                                            | GKP-VMNFV----         | KTGVHDGF 110   |
| CC75-2W                   | 57 | TNONGKIY-HLEQKLS---IEGQEKTRVLVTHLLLSIAASI-----                          |                                            | GKP-VMNFV----         | KTGVHDGF 110   |
| CC59Q                     | 54 | IDYV-----                                                               | DDFIFDGNLYLLIGEDGA-NIITRSAPLVYLVNG-----    |                       | KFWVNNHA 97    |
| CC72-1Q                   | 54 | IDYV-----                                                               | DDFIFDGNLYLLIGEDGA-NIITRSAPLVYLVNG-----    |                       | KFWVNNHA 97    |
| CC1-2G                    | 54 | IDYV-----                                                               | DDFIFDGNLYLLIGEDGA-NIITRSAPLVYLVNG-----    |                       | KFWVNNHA 97    |
| CC1-2G                    | 54 | IDYV-----                                                               | DDFIFDGNLYLLIGEDGA-NIITRSAPLVYLVNG-----    |                       | KFWVNNHA 97    |
| ST425-1E                  | 52 | VYKI-----                                                               | NTFSYEGEAILTVGDGVGV-----                   | GKV-FHYVN---          | GKFDYHQRV 91   |
| CC15TRD2E                 | 52 | VYKI-----                                                               | NTFSYEGEAILTVGDGVGV-----                   | GKV-FHYVN---          | GKFDYHQRV 91   |
| CC133_771E                | 52 | VYKI-----                                                               | NTFSYEGEAILTVGDGVGV-----                   | GKV-FHYVN---          | GKFDYHQRV 91   |
| CC398-1E                  | 52 | VYKI-----                                                               | NTFSYEGEAILTVGDGVGV-----                   | GKV-FHYVN---          | GKFDYHQRV 91   |
| CC80-1Y                   | 55 | NNSKNY---ESENKLT---QEGYKARQLPENTLLVTCIASI-----                          |                                            | GKN-ALLRK---          | QSCNQQT 107    |
| CC75-1U                   | 55 | IGK-----                                                                | DSNYDIEESYISILKDGAGV-----                  | GRL-NLRPG---          | KSSVIGTM 93    |
| CC1-1F                    | 62 | SINSTYN--DQNRVN---KNKTEKYILSKGDLAMVLNDKTKDGKIIGRS-IFIDK---DNQYIYNQRT    |                                            |                       | 122            |
| CC873 e*                  | 57 | PKKETP-----                                                             | KGSDNTQYKRRAGQLMYGKLDLFLN-----             | CAF-GIVPD---          | SLNNYESTID 105 |
| CC80-2Z                   | 59 | RLIKIYN-----                                                            | SKEFSSQKNKFNPNVLYGKLRPYL-----              | NKY-YFTKK---          | SGVCSSEI 106   |
| CC80-3XS.Sau11819ORF2227P | 60 | LRPNS-----                                                              | QTKY-FIENPPQSVIANKEDILMTRTGNT-----         | GKV-VTNVF---          | GAFHNFF 108    |
| CC80-1X                   | 60 | LRPNS-----                                                              | QTKY-FIENPPQSVIANKEDILMTRTGNT-----         | GKV-VTNVF---          | GAFHNFF 108    |
| CC75-1T                   | 60 | NNSKVTH---SKEKITE-YAMKSLKLVKNSVLIAMYGGFNQI---GRT-GLLKI-----DATINQAI     |                                            |                       | 116            |
| ST130-1T                  | 60 | NNSKVTH---SKEKITE-YAMKSLKLVKNSVLIAMYGGFNQI---GRT-GLLKI-----DATINQAI     |                                            |                       | 116            |
| CC93-3M                   | 57 | HSKFKTV--LDSGNIP-NIEKAVFELIQKGDIVFADASEDYSDL--GKA-VMIDFE--PNSLISGLHT    |                                            |                       | 118            |
| CC133_771-1strain32320Hsd | 57 | HSKFKTV--LDSGNIP-NIEKAVFELIQKGDIVFADASEDYSDL--GKA-VMIDFE--PNSLISGLHT    |                                            |                       | 118            |
| CC133-2fromED133J         | 55 | MTS-----                                                                | VSEPLSEIDAVGIGRKGTI-----                   | NKP-YLLEA----         | PFWTVDTL 92    |
| CC72-2J                   | 55 | MTS-----                                                                | VSEPLSEIDAVGIGRKGTI-----                   | NKP-YLLEA----         | PFWTVDTL 92    |
| CC51TRD1J                 | 55 | MTS-----                                                                | VSEPLSEIDAVGIGRKGTI-----                   | NKP-YLLEA----         | PFWTVDTL 92    |
| CC30-2strainMRS252HsdSJ   | 55 | MTS-----                                                                | VSEPLSEIDAVGIGRKGTI-----                   | NKP-YLLEA----         | PFWTVDTL 92    |
| CC59-1J                   | 55 | MTS-----                                                                | VSEPLSEIDAVGIGRKGTI-----                   | NKP-YLLEA----         | PFWTVDTL 92    |
| CC72-1R                   | 56 | KTLNSS-----                                                             | KYISE-EAFEKEFKIRPEFGDILMTRIGDI-----        | GTP-NIVSS---          | NEKFAYYVSL 108 |
| CC15TRD1O                 | 59 | HNIKREN---ITNFITE-KGLNNESSAKLITNEAILIAMYGGKTR---GMS-ALNLF-----EATTNQAC  |                                            |                       | 115            |
| CC398-1strain398HsdSN     | 61 | FDKEIS-----                                                             | NIDNIKKYVVVEENDFVYNPRMSNYAPF--GPV-NRNKL--- | GKKGVMSPLY            | 112            |
| ST425-1C                  | 56 | FNNRSINT--NNLTGKVN-VNSKELKNYSVEKGDVFFTRTSEVIGEI--GYP-SVILND--PENTVFSGFV |                                            |                       | 118            |
| CC30-1strainMRS252HsdSC   | 56 | FNNRSINT--NNLTGKVN-VNSKELKNYSVEKGDVFFTRTSEVIGEI--GYP-SVILND--PENTVFSGFV |                                            |                       | 118            |
| CC45-1strain3067HsdSC     | 56 | FNNRSINT--NNLTGKVN-VNSKELKNYSVEKGDVFFTRTSEVIGEI--GYP-SVILND--PENTVFSGFV |                                            |                       | 118            |
| CC97A                     | 60 | RNGKLN--NDLVYISK-DIDDEMKNSTRYYGDVLLNITGASI-----                         |                                            | GRT-AINSIV--          | ETHANLNQHV 118 |
| CC1-2strainMW2HsdSA       | 60 | RNGKLN--NDLVYISK-DIDDEMKNSTRYYGDVLLNITGASI-----                         |                                            | GRT-AINSIV--          | ETHANLNQHV 118 |
| CC1-1strainMW2HsdSA       | 60 | RNGKLN--NDLVYISK-DIDDEMKNSTRYYGDVLLNITGASI-----                         |                                            | GRT-AINSIV--          | ETHANLNQHV 118 |
| CC5-2strainN315HsdSA      | 60 | RNGKLN--NDLVYISK-DIDDEMKNSTRYYGDVLLNITGASI-----                         |                                            | GRT-AINSIV--          | ETHANLNQHV 118 |
| CC75-2V                   | 66 | GDGYFYN--SNKVFTSN-EKAEVLKSCNVFPGDIVIAKMDAPI-----                        |                                            | ARA-AIVPDN--          | NIGKYLMSDG 125 |
| CC22-1strain5096HsdSB     | 61 | FSKSVS-----                                                             | SKNLENYTLIKNGEFAYNKSYNGYPL--GAI-KRLTR---   |                       | YDSGVLSL 111   |
| CC51TRD2P                 | 56 | FSKSVS-----                                                             | SKNLENYTLIKNGEFAYNKSYNGYPL--GAI-KRLTR---   |                       | YDSGVLSL 106   |
| CC5-1strainN315HsdSB      | 61 | FSKSVS-----                                                             | SKNLENYTLIKNGEFAYNKSYNGYPL--GAI-KRLTR---   |                       | YDSGVLSL 111   |
| CC93-2 b*                 | 57 | KNNKIIIS--SDDRKISESDYKIKYKLEKGDLLLTIVGTI-----                           |                                            | GRA-AIVKN---          | PNNIAFORSV 115 |

Consensus\_ss:

e ee eeeee eee eee eeee e

Conservation:

|                           |     |                                                                          |     |
|---------------------------|-----|--------------------------------------------------------------------------|-----|
| CC80-3 f*                 | 111 | IKFKINE---QNSPLFIYQFTLTSKFNKWKVMS---VRSQQPGINSEYAKLPLVLPN-KLEQQKIAK      | 172 |
| CC45-1L                   | 110 | VGLRVNN---NNLPSFIYMLSYKGNQKKIKRIQ---MGAVQPSVKVVSQFKFKIYLVPI-KDEQEKVAK    | 171 |
| CC97 c*                   | 105 | PAFEINT--EKIEPNYFISYISRPSFYKSKEKYS---TGTGSKRIHENTVNLNPSLHLPC-LNEQLKIAS   | 167 |
| CC22-1I                   | 116 | IAFNSNE---KITDNFLASLLSENVDLLKLC---SGATAKGVSQKLNLRLYVTI PHSISEQEETIAE     | 178 |
| CC873D                    | 99  | TVLYPTQ---NTSSLFIQYKFKTHRMHFKFKINSQ--GLTSDTWNLYKQKLNINIDIPV-LEEQQEKIGD   | 162 |
| CC5-1D                    | 99  | TVLYPTQ---NTSSLFIQYKFKTHRMHFKFKINSQ--GLTSDTWNLYKQKLNINIDIPV-LEEQQEKIGD   | 162 |
| CC30-1D                   | 99  | TVLYPTQ---NTSSLFIQYKFKTHRMHFKFKINSQ--GLTSDTWNLYKQKLNINIDIPV-LEEQQEKIGD   | 162 |
| CC5-2H                    | 105 | PVFKGI---DANQYLLTLHLNYQ-LKKEYIKYA---TGTSQLVLSQKDLQNIKTKLPS-YEEQQKIGD     | 164 |
| CC133-2fromED133 d*       | 116 | IRFRTNH---KIRSEFFLIFMRSNQMQRKILEAN---PGSAITNLVVKELKLIIPFPLPV-KFEQDKISQ   | 178 |
| CC72-2S                   | 102 | CSIKGD-----KFLYYFLEWFATQNKWIRFS---QGSTFESISGNDIRNIHIIKIPV-EDERTKIIK      | 158 |
| CC93-3 a*                 | 107 | CHFHWKV---NKINTEFIYYLNS---LNISTFGV---QAVKGVTLNNDINSINIVKLPN-EEEQNI IAK   | 166 |
| CC93-2K                   | 111 | LSLSSL---KYDKLYSLYSLLY--TMKKISANL---QGTSIKGITKKELLDSIIKI PHNLEEQQKIGD    | 170 |
| CC30-2K                   | 111 | LSLSSL---KYDKLYSLYSLLY--TMKKISANL---QGTSIKGITKKELLDSIIKI PHNLEEQQKIGD    | 170 |
| CC80-2W                   | 111 | LIFLNP---KFNLFMYWLEY--FKDKWSKYG---QPGSQVNLNTEIVKSTQLNMPN-NHEQEKVGG       | 169 |
| CC75-2W                   | 111 | LIFLKP---KFNLFMYWLEY--FKDKWSKYG---QPGSQVNLNTEIVKSTQLNMPN-NHEQEKVGG       | 169 |
| CC59Q                     | 98  | HILSPL---NGNIQYLYQVAEL----VNYEKYN---TGTAQPKLNIQNLKI INVVISNLEEQQKIGS     | 155 |
| CC72-1Q                   | 98  | HILSPL---NGNIQYLYQVAEL----VNYEKYN---TGTAQPKLNIQNLKI INVVISNLEEQQKIGS     | 155 |
| CC1-2G                    | 98  | HVVKSN---DHNLFMYNYLNF---KELRAFV---TGNAPAKLTHANLKNINLKI PC-LTEQDKVSA      | 154 |
| ST425-1E                  | 92  | YKISDFK---NYYGLLLFFYFYSQ-NFLKETKKYS---AKTSVDSVRKDMVANMKVPRPI-YIEQEKIGQ   | 152 |
| CC15TRD2E                 | 92  | YKISDFK---NYYGLLLFFYFYSQ-NFLKETKKYS---AKTSVDSVRKDMVANMKVPRPI-YIEQEKIGQ   | 152 |
| CC133_771E                | 92  | YKISDFK---NYYGLLLFFYFYSQ-NFLKETKKYS---AKTSVDSVRKDMVANMKVPRPI-YIEQEKIGQ   | 152 |
| CC398-1E                  | 92  | YKISDFK---NYYGLLLFFYFYSQ-NFLKETKKYS---AKTSVDSVRKDMVANMKVPRPI-YIEQEKIGQ   | 152 |
| CC80-1Y                   | 108 | NAVVPFE---NINIDYLYYISDS--LSTFMKSI A---GKTATQIVNKNTFENLEIY LAP-FEEQKNIAD  | 167 |
| CC75-1U                   | 94  | GHIQSN---NDVIEFLYYRMKV---VDFPKYI---IGSTI PHLYFKDYKSKETLIPSSIQEQKIGM      | 151 |
| CC1-1F                    | 123 | ERLIPFA---ENDNKFLWFLMNTDLIRNKIKGMM---QGATQVYINYSIKLISIQIQLPL-LEEQQKIRG   | 184 |
| CC873 e*                  | 106 | SPSDFPI---NGDSKFLLEKIKLKSFKYKFGDIA---NGSRKAKRINQDTPFLSIPVPAPK-YDEQRLRIG  | 168 |
| CC80-2Z                   | 107 | WVLKSTKE-DKLLNLFYFIQTKRYS-DVASKS---AGSKMPRADWGLIENIRVYFPE-LCEQDKVIGQ     | 169 |
| CC80-3XS_Sau11819ORF2227P | 109 | KIKFDKN---LYDRFLVEVLNSSKIQNKILSLA---GSSTIPDLNHSDFYSISSYPL-LREQQKIGK      | 170 |
| CC80-1X                   | 109 | KIKFDKN---LYDRFLVEVLNSSKIQNKILSLA---GSSTIPDLNHSDFYSISSYPL-LREQQKIGK      | 170 |
| CC75-1T                   | 117 | SALLMNH---ETNPEFIQAFNLNYQV-KGWKRYAA---SSRKDPNITKKDIEQKVPYVS-INEQQKIGK    | 177 |
| ST130-1T                  | 117 | SALLMNH---ETNPEFIQAFNLNYQV-KGWKRYAA---SSRKDPNITKKDIEQKVPYVS-INEQQKIGK    | 177 |
| CC93-3M                   | 119 | HLFRPLN---NAISNFIPIYTKTLSYKFFIRQQG---TGISVLGISKKSLNINLVLI PRSELEQQKIGQ   | 181 |
| CC133_771-1strain32320Hsd | 119 | HLFRPLN---NAISNFIPIYTKTLSYKFFIRQQG---TGISVLGISKKSLNINLVLI PRSELEQQKIGQ   | 181 |
| CC133-2fromED133J         | 93  | FYCTPKK---ETDILFILSLFRKIN---WKVYD---ESTGVPVSLSKQTINKINRFVPT-NKEQQKIGK    | 150 |
| CC72-2J                   | 93  | FYCTPKK---ETDILFILSLFRKIN---WKVYD---ESTGVPVSLSKQTINKINRFVPT-NKEQQKIGK    | 150 |
| CC51TRD1J                 | 93  | FYCTPKK---ETDILFILSLFRKIN---WKVYD---ESTGVPVSLSKQTINKINRFVPT-NKEQQKIGK    | 150 |
| CC30-2strainMRSA252HsdSJ  | 93  | FYCTPKK---ETDILFILSLFRKIN---WKVYD---ESTGVPVSLSKQTINKINRFVPT-NKEQQKIGK    | 150 |
| CC59-1J                   | 93  | FYCTPEK---EADILFILSLFRKIN---WKLYD---ESTGVPVSLSKQTINKINRNVPT-NKEQQKIGK    | 150 |
| CC72-1R                   | 109 | ALLKTK---NLNSYFLKNLILSSSIQNELWRKT---LHVAFPKKINKNEIGKIKINYPK-KQEQQKIGQ    | 170 |
| CC15TRD1O                 | 116 | AIYQTN---QININVFQYFQK--LYEFRLSLS---NEGSQKNLSLSLKEITLNYPN-EQEQQKIGD       | 173 |
| CC398-1strain398HsdSN     | 113 | TVFKIQ---NIDLNFIEFYFKSSKWRFMALNGD-SGARADRFSIKDRTFMEMPLHIPC-MDEQIKIGQ     | 176 |
| ST425-1C                  | 119 | LRGRPKSGIDLINNNFKRYVFFTNSFRKEMITKS---SMTTRALTSGTAINKMKVIY PVSACEQKIGD    | 184 |
| CC30-1strainMRSA252HsdSC  | 119 | LRGRPKSGIDLINNNFKRYVFFTNSFRKEMITKS---SMTTRALTSGTAINKMKVIY PVSACEQKIGD    | 184 |
| CC45-1strain3067HsdSC     | 119 | LRGRPKSGIDLINNNFKRYVFFTNSFRKEMITKS---SMTTRALTSGTAINKMKVIY PVSACEQKIGD    | 184 |
| CC97A                     | 119 | CIIRLKK---EYNYFFGQYLLSRKGRKRIFLAQ---SGGSREGLNFKEIANLKI FTPTTIFEEQQKIGK   | 181 |
| CC1-2strainMW2HsdSA       | 119 | CIIRLKK---EYNYFFGQYLLSRKGRKRIFLAQ---SGGSREGLNFKEIANLKI FTPTTIFEEQQKIGK   | 181 |
| CC1-1strainMW2HsdSA       | 119 | CIIRLKK---EYNYFFGQYLLSRKGRKRIFLAQ---SGGSREGLNFKEIANLKI FTPTTIFEEQQKIGK   | 181 |
| CC5-2strainN315HsdSA      | 119 | CIIRLKK---EYNYFFGQYLLSRKGRKRIFLAQ---SGGSREGLNFKEIANLKI FTPTTIFEEQQKIGK   | 181 |
| CC75-2V                   | 126 | IRLSVDT---VHFNTKFVLECI NRKSFRRKVEDNS---SGSTRMIRGLS TLGSLTLTKTT-LKEQQKIGQ | 188 |
| CC22-1strain5096HsdSB     | 112 | ICFSIKS---EMSKDFMEAYFDSTHWYREVSGIAVEGARNHGLLNVSVDNFFTILIKYPS-LEEQQKIGK   | 177 |
| CC51TRD2P                 | 107 | ICFSIKS---EMSKDFMEAYFDSTHWYREVSGIAVEGARNHGLLNVSVDNFFTILIKYPS-LEEQRKIGD   | 172 |
| CC5-1strainN315HsdSB      | 112 | ICFSIKS---EMSKDFMEAYFDSTHWYREVSGIAVEGARNHGLLNVSVDNFFTILIKYPS-LEEQQKIGK   | 177 |
| CC93-2 b*                 | 116 | AILKTKA---TYDVGFIFQLFQTKYFKNLLLRKQ---VVSAPGLYLGDIRKIKISITNIEEQRKIGI      | 178 |

Consensus\_ss:

eeee hhhhhhhh hhhhhhhh hhhhh ee hhhhhhhh
